# Title: High-resolution African HLA resource uncovers *HLA-DRB1* expression effects underlying vaccine response

## Authors

Alexander J. Mentzer<sup>1,2\*</sup>, Alexander T. Dilthey<sup>1,3,4</sup>, Martin Pollard<sup>5</sup>, Deepti Gurdasani<sup>5</sup>, Emre Karakoc<sup>5</sup>, Tommy Carstensen<sup>5</sup>, Allan Muhwezi<sup>6</sup>, Clare Cutland<sup>7</sup>, Amidou Diarra<sup>8</sup>, Ricardo da Silva Antunes<sup>9</sup>, Sinu Paul<sup>9</sup>, Gaby Smits<sup>10</sup>, Susan Wareing<sup>11</sup>, HwaRan Kim<sup>12</sup>, Cristina Pomilla<sup>5</sup>, Amanda Y. Chong<sup>1</sup>, Debora Y.C. Brandt<sup>13</sup>, Rasmus Nielsen<sup>13</sup>, Samuel Neaves<sup>14,15</sup>, Nicolas Timpson<sup>15,16</sup>, Austin Crinklaw<sup>9</sup>, Cecilia S. Lindestam Arlehamn<sup>9</sup>, Anna Rautanen<sup>1</sup>, Dennison Kizito<sup>6</sup>, Tom Parks<sup>1,17</sup>, Kathryn Auckland<sup>1</sup>, Kate E. Elliott<sup>1</sup>, Tara Mills<sup>1</sup>, Katie Ewer<sup>18</sup>, Nick Edwards<sup>18</sup>, Segun Fatumo<sup>6,19</sup>, Sarah Peacock<sup>20</sup>, Katie Jeffery<sup>11</sup>, Fiona R.M. van der Klis<sup>10</sup>, Pontiano Kaleebu<sup>6</sup>, Pandurangan Vijayanand<sup>9</sup>, Bjorn Peters<sup>9,21</sup>, Alessandro Sette<sup>9,21</sup>, Nezhil Cereb<sup>12</sup>, Sodiomon Sirima<sup>8</sup>, Shabir A. Madhi<sup>7</sup>, Alison M. Elliott<sup>6,22</sup>, Gil McVean<sup>2</sup>, Adrian V.S. Hill<sup>1,18†</sup>, Manjinder S. Sandhu<sup>23†\*</sup>

## Affiliations

<sup>1</sup>Wellcome Centre for Human Genetics, University of Oxford, UK

<sup>2</sup>Big Data Institute, Li Ka Shing Centre for Health Information and Discovery, University of Oxford, Oxford, UK

<sup>3</sup>Institute of Medical Microbiology and Hospital Hygiene, University Hospital of Düsseldorf, Heinrich Heine University Düsseldorf

<sup>4</sup>Genome Informatics Section, Computational and Statistical Genomics Branch, National Human Genome Research Institute, Bethesda, Maryland, USA

<sup>5</sup>Wellcome Sanger Institute, Hinxton, Cambridge, UK

<sup>6</sup>Medical Research Council/Uganda Virus Research Institute and London School of Hygiene & Tropical Medicine Uganda Research Unit, Entebbe, Uganda

<sup>7</sup>South African Medical Research Council Vaccines and Infectious Diseases Analytics Research Unit, University of the Witwatersrand, Johannesburg, South Africa

<sup>8</sup>Groupe de Recherche Action en Santé (GRAS) 06 BP 10248 Ouagadougou, Burkina Faso

<sup>9</sup>Division of Vaccine Discovery, La Jolla Institute for Immunology, La Jolla, California, USA

<sup>10</sup>National Institute for Public Health and the Environment, Bilthoven, The Netherlands

<sup>11</sup>Microbiology Department, John Radcliffe Hospital, Oxford University NHS Foundation Trust, Oxford, UK

<sup>12</sup>Histogenetics, New York, USA

<sup>13</sup>Department of Integrative Biology, University of California at Berkeley, California, USA

<sup>14</sup>Avon Longitudinal Study of Parents and Children at University of Bristol, Bristol, UK

<sup>15</sup>Population Health Sciences, Bristol Medical School, University of Bristol, Bristol, UK

<sup>16</sup>MRC Integrative Epidemiology Unit, University of Bristol, Bristol, UK

<sup>17</sup>Department of Infectious Disease, Imperial College London, UK

40 <sup>18</sup>The Jenner Institute, University of Oxford, UK

41 <sup>19</sup>The Department of Non-communicable Disease Epidemiology, London School of Hygiene and  
42 Tropical Medicine London, London, UK

43 <sup>20</sup>Tissue Typing Laboratory, Cambridge University Hospitals NHS Foundation Trust,  
44 Cambridge, UK

45 <sup>21</sup>University of California San Diego, La Jolla, CA, USA

46 <sup>22</sup>Department of Clinical Research, London School of Hygiene & Tropical Medicine, London,  
47 UK

48 <sup>23</sup>Department of Epidemiology & Biostatistics, School of Public Health, Imperial College  
49 London, UK

50 \*Correspondence to: Alexander J Mentzer [alexander.mentzer@ndm.ox.ac.uk](mailto:alexander.mentzer@ndm.ox.ac.uk) and Manjinder  
51 S Sandhu [m.sandhu@imperial.ac.uk](mailto:m.sandhu@imperial.ac.uk)

52 †These authors contributed equally to this work

53  
54

## 55 **Abstract**

56 How human genetic variation contributes to vaccine immunogenicity and effectiveness is

57 unclear, particularly in infants from Africa. We undertook genome-wide association

58 analyses of eight vaccine antibody responses in 2,499 infants from three African countries

59 and identified significant associations across the human leukocyte antigen (HLA) locus for

60 five antigens spanning pertussis, diphtheria and hepatitis B vaccines. Using high-resolution

61 HLA typing in 1,706 individuals from 11 African populations we constructed a continental

62 imputation resource to fine-map signals of association across the class II HLA observing

63 genetic variation explaining up to 10% of the observed variance in antibody responses.

64 Using follicular helper T-cell assays, *in silico* binding, and immune cell eQTL datasets we

65 find evidence of *HLA-DRB1* expression correlating with serological response and inferred

66 protection from pertussis following vaccination. This work improves our understanding of

67 molecular mechanisms underlying HLA associations that should support vaccine design and

68 development across Africa with wider global relevance.

## 69 **Teaser**

70 High-resolution typing of HLA diversity provides mechanistic insights into differential

71 potency and inferred effectiveness of vaccines across Africa.

72 **MAIN TEXT**

73  
74 **Introduction**

75 Vaccination is one of the most cost-effective methods for preventing disease caused by  
76 infections world-wide<sup>1</sup>. The strategy has been successful for eradicating smallpox, and also  
77 reducing morbidity and mortality associated with other infections, many of which were  
78 commonplace in the pre-vaccination era<sup>2</sup>. Such diseases include diphtheria (a toxin-mediated  
79 disease caused by *Corynebacterium diphtheriae*), pertussis (another toxin-mediated disease  
80 caused by *Bordetella pertussis*) and measles, all of which have vaccines delivered in infancy as  
81 part of the expanded programme on immunisation (EPI).

82 Despite the unquestionable success of vaccination, significant challenges remain both for  
83 maintaining control of vaccine-preventable diseases, and in the development of vaccines against  
84 other diseases that are more challenging to target in successful vaccination strategies. For  
85 example, epidemics of pertussis are being increasingly reported in vaccinated communities<sup>3</sup>. The  
86 incidence of these vaccine failures appears to have increased since the move away from whole-  
87 cell, to acellular (multi-antigen) pertussis preparations, a decision largely made on the basis of  
88 increased reactogenicity following whole-cell vaccination<sup>4</sup>. However, the specific mechanisms  
89 underlying the increase in rates of failures remain unclear, and several countries (particularly in  
90 Africa) continue to use whole-cell preparations. Furthermore, it is well recognised that several  
91 infectious diseases pose particular problems for vaccine development including tuberculosis<sup>5</sup>,  
92 malaria<sup>6</sup>, human immunodeficiency virus<sup>7</sup>, and even SARS-CoV-2 where increasing reports of  
93 vaccine breakthrough infection are being reported as early as six months following two doses of  
94 vaccine<sup>8</sup>. Amongst the multitude of challenges posed in these diverse development efforts, two  
95 distinct challenges are common amongst both the vaccine-preventable and more challenging  
96 diseases. Firstly, the antigens to target and the ideal components of the immune response to  
97 stimulate to induce protection – so called correlates of protection – are often difficult to define<sup>9</sup>.

98 Secondly, given the necessary world-wide scope of delivery required for many vaccines and the  
99 diversity of factors that may influence immune response to vaccination, understanding  
100 population differences in risks of vaccine failure is important, particularly in low-to-middle  
101 income countries where reporting of failures may not be effectively captured, and where the  
102 burden of vaccine preventable diseases is frequently the highest.

103 One feature of population differences that has been under-studied to date is human genetic  
104 variation. It has been recognised for decades that variation across the major histocompatibility  
105 complex (MHC), known in humans as the human leukocyte antigen (HLA) locus, is associated  
106 with differential response and failure to respond to the hepatitis B surface antigen (HBsAg)  
107 vaccine<sup>10</sup>, as well as responses against tetanus toxin (TT)<sup>11</sup> and measles vaccines (MV)<sup>12</sup>. These  
108 findings are in keeping with the well-known association of the locus with susceptibility to  
109 multiple other infectious and autoimmune diseases<sup>13-15</sup>. We have recently found evidence that  
110 carriage of specific *HLA* gene product alleles (HLA-DQB1\*06 in particular) may improve  
111 SARS-CoV-2 vaccine immunogenicity and reduce the risk of breakthrough infection with  
112 COVID-19 post-vaccination<sup>16</sup>. Despite the recognition of these associations, it has not been  
113 possible to elucidate the precise underlying causal mechanisms. The presence of *HLA* genes  
114 across this locus leads to the speculation that differential peptide binding is responsible.  
115 However, the high concentration of genes in the region, the high levels of genetic diversity and  
116 epistatic interactions among *HLA* loci within long stretches of linkage disequilibrium pose  
117 substantial challenges to fine-mapping any association signals reliably. Any mapping and  
118 downstream mechanistic interpretation is particularly challenging in populations hitherto under-  
119 represented in global genetic studies. Despite statistical and computational advances for *HLA*  
120 biology using methods such as *HLA* imputation applied to common autoimmune diseases  
121 including multiple sclerosis<sup>17</sup> and inflammatory bowel disease<sup>18</sup> and a limited number of  
122 infectious agents such as HIV-1<sup>19</sup>, progress has largely been restricted to populations of

123 European ancestry. Given the worldwide, standardised delivery of vaccines, studying vaccine  
124 response heterogeneity in African populations offers the opportunity to not only understand the  
125 influence of host genetics in this diverse, infection burdened and vulnerable set of populations,  
126 but also to improve our understanding of mechanisms of vaccine response and thus open avenues  
127 for vaccine development for other infectious diseases of importance.

128 Here we present our findings from a set of genome-wide association studies of diverse vaccine  
129 responses in African infants. We find associations across the HLA with five of eight measured  
130 antigens delivered as part of the EPI programme. In order to understand the implications and  
131 mechanisms underlying these associations we developed a comprehensive high-resolution HLA  
132 reference panel for imputation and a suite of expression quantitative trait loci (eQTL) resources  
133 for HLA. Alongside of peptide binding and immunological assays we highlight *HLA-DRB1*  
134 expression as a possible factor associated with differential inferred protection against pertussis as  
135 well as antibody responses against both pertussis and diphtheria antigens. This study highlights  
136 the importance of accounting for genetic diversity in vaccine design, deployment and universal  
137 effectiveness and provides a framework to support optimal population-adjusted vaccine design  
138 and development across Africa and worldwide.

## 139 140 141 **Results**

### 142 *HLA associations with diverse vaccine responses in African infants*

143 Given limited understanding of the contribution of host genetics to variation in response and  
144 effectiveness of the most widely delivered vaccines in the world, and the need to understand  
145 such responses in under-represented populations of the world, we tested for association between  
146 vaccine antigen responses and genetic variants (17 million variants typed and imputed with the  
147 merged 1000 Genomes – 1000Gp3 – and African Genome Diversity Project – AGDP – reference  
148 panel<sup>20</sup>) in 2,499 infants recruited from three African countries (Burkina Faso (BF), South Africa  
149 (SA) and Uganda (UG) defined as the *VaccGene* cohorts, **Fig. 1A**). The vaccine responses

150 included were immunoglobulin G (IgG) antibody levels against eight vaccine antigens  
151 (diphtheria toxin (DT); pertussis toxin (PT), filamentous haemagglutinin (FHA), and pertactin  
152 (PRN); tetanus toxin (TT); *Haemophilus influenzae* type b (Hib); measles virus (MV); and  
153 hepatitis B surface antigen (HBsAg)). The demographics of the *VaccGene* populations are  
154 described in **Table S1** and a summary of the participating individuals and stringent quality  
155 control is provided in **Fig. S1A**, Methods and **Tables S2** and **S3**. The IgG traits were normalised  
156 (using inverse normal transformation, with distributions represented in **Fig. S1B**) and association  
157 testing was performed with time between last vaccine and blood sample included as a fixed  
158 effect covariate which was shown to be inversely correlated with all traits with response to DT  
159 as an exemplar in **Fig. S1C**. A genetic relatedness matrix was included in the association model  
160 as a random effect covariate using a pooled linear mixed model<sup>21</sup>. We identified significant  
161 evidence of association within the HLA region for five vaccine responses including pertussis  
162 toxin (PT), pertussis filamentous haemagglutinin (FHA), pertussis pertactin (PRN), diphtheria  
163 toxin (DT) and HBsAg (**Fig. 1B** and **Additional Data Table 1**). The patterns of pooled  
164 association statistics were different across each of the tested traits but all index variants with the  
165 smallest *P*-value were centred on the class II HLA region and particularly the *HLA-DRB1*  
166 (rs73727916 for PT, beta=0.33,  $P=1.9 \times 10^{-27}$ ; rs34951355 for DT, beta=-0.56,  $P=1.5 \times 10^{-26}$ ;  
167 rs6914950 for HBsAg, beta=0.35,  $P=9.0 \times 10^{-13}$ ) and *HLA-DQ* (rs1471103672 for FHA, beta=-  
168 0.30,  $P=9.8 \times 10^{-16}$ ; rs147857322 for PRN, beta=0.37,  $P=4.2 \times 10^{-23}$ ) gene loci. No associations  
169 were observed outside of the HLA either at an individual or pooled cohort level for any trait and  
170 no associations were observed across the genome for MV or TT responses (**Figs. S1D** and **S1E**).  
171 This is the first report to our knowledge that demonstrates the importance of genetic variation in  
172 influencing the response to vaccine antigens in African infants.

174 *High resolution HLA typing across Africa*

175 In order to move towards an increased understanding of the mechanisms underlying the HLA  
176 associations observed with the vaccine antigens we first sought to determine the relationship  
177 between the typed and imputed genetic variants in our studied African infants and HLA allele  
178 diversity across the African continent. HLA alleles are known to vary across populations and  
179 there has traditionally been a bias towards cataloguing class I allele diversity owing to  
180 recognised associations with multiple traits including malaria and HIV. We therefore performed  
181 high resolution typing for three class I and eight class II *HLA* genes in a total of 1,706  
182 individuals from African and admixed African-American populations. 832 individuals were  
183 included from the 3 *VaccGene* populations, alongside 634 individuals from 6 African  
184 populations (Esan in Nigeria (ESN), Gambian in Western Division, The Gambia – Mandinka  
185 (GWD), Luhya in Webuye, Kenya (LWK), Maasai in Kinyawa, Kenya (MKK), Mende in Sierra  
186 Leone (MSL), and Yoruba in Ibadan, Nigeria (YRI)) and 131 from 2 admixed African  
187 populations (African Caribbean in Barbados (ACB), and African Ancestry in Southwest USA  
188 (ASW)) from the 1000 Genomes project<sup>21</sup>. Newly sequenced individuals from the MKK  
189 population were included in this analysis with sample identifiers provided **Table S4**. With the  
190 exception of the new *VaccGene* populations and MKK individuals, all other individuals were  
191 selected on the basis of availability of DNA for classical HLA typing and whole-genome DNA  
192 variant calls available through genotype or whole-genome sequence data.

193 As summarised in **Fig 1C** (with a breakdown of numbers of individuals from each population  
194 with genotype, whole genome sequence, and diverse HLA type information available on each  
195 platform provided in **Table S5**), we employed three separate typing platforms to ensure the  
196 highest quality HLA allele calls, to protein coding level of resolution, possible for the continent.  
197 Our first objective was to ensure that any HLA calls derived from a short-read (MiSeq) next-  
198 generation sequencing platform was equivalent to traditional Sanger based typing, that has

199 traditionally been considered the Gold Standard in clinical facilities. Using 47 randomly selected  
200 individuals from Uganda (discussed in **Supplementary Text**) we found all calls derived from  
201 Sanger based typing were also made using MiSeq and thus quality was considered equivalent.  
202 However, the ability to distinguish *cis/trans* strand state with the MiSeq platform reduced the  
203 number of potential ambiguous calls when two heterozygous alleles occurred in an individual  
204 and thus when considering the potential scalability and cost-effectiveness for large-scale typing  
205 we elected to proceed with MiSeq for the next stage of validation. Our second objective of this  
206 phase of the project was to determine the number of novel protein coding HLA alleles detectable  
207 in our tested African populations, some of which are historically poorly characterised. We used  
208 long-read PacBio technology to sequence exons of HLA genes in up to 836 individuals where  
209 MiSeq data was also available across all populations. With the exception of individuals from BF,  
210 all tested populations were found to possess at least one novel allele at one locus using one or  
211 other of the sequencing methods, although overall frequencies of novel allele detection were low,  
212 with less than 5% of all typed individuals possessing novel protein coding alleles detectable at  
213 any locus (**Fig 1D**). However, some populations did exhibit higher proportions of novel alleles  
214 than others with over 4% of MKK individuals possessing novel alleles detectable by either  
215 MiSeq or PacBio typing methods at HLA-A, HLA-DPA1 and HLA-DQB1 loci, and novel HLA-  
216 DPA1 alleles were detected in all except the West African BF and MSL populations. Overall,  
217 there was little advantage in applying PacBio to detect novel alleles compared to MiSeq for the  
218 purposes of novel protein coding allele detection and therefore MiSeq was used for all further  
219 downstream analyses. Together these results serve to highlight the importance of understanding  
220 the distribution of novel alleles in populations traditionally under-represented in genomic studies  
221 to date, especially in relation to complex regions of the genome such as HLA.

222 In order to understand allelic diversity in this dataset, and thus the importance of including  
223 representatives from all tested populations across the continent, we calculated pairwise



224 population differentiation estimates (using  $G_{ST}$ ) between the tested populations using 6-digit ‘G’  
225 coding of allelic variation ( $G_{ST}$  explicitly accounts for multi-allelic sites and is therefore  
226 preferred over  $F_{ST}$  in such scenarios). We noted some loci to be substantially differentiated  
227 across the continent, as already known, including HLA-B, HLA-C and HLA-DRB1 (**Fig. 1E**).  
228 However, we also noted that there was significant differentiation at the HLA-DPB1 locus with  
229 some estimates  $>0.5$ , equivalent to HLA-B, which has rarely been described in Africa and is  
230 even clearly observed at the lower 2-digit (1 field) level of resolution as shown in the pie-charts  
231 matched to population geography in **Fig. 1F**. However, most of the high levels of differentiation  
232 observed in HLA-DPB1 were linked with the MKK individuals who also appeared to have a  
233 preferential differentiation of HLA-C, and HLA-DP loci compared to other populations (**Fig.**  
234 **1E**). Otherwise, differentiation was high ( $>0.4$ ) for HLA-B, HLA-C and HLA-DRB1 loci in a  
235 non-specific population way supporting the inclusion of as many different continental  
236 populations as possible in the African HLA imputation reference panel.

### 237 *An HLA imputation reference panel for Africa*

238 We next combined these high resolution 3-field (6-digit ‘G’) resolution HLA types derived  
239 from MiSeq with genotype data from 1,597 individuals across the same 11 African populations  
240 to generate a large, comprehensive HLA imputation reference panel available for African  
241 populations (**Fig. 2A**; see Data Availability in Methods). Variant calls across the region were  
242 available either from direct array genotyping or next-generation sequence (NGS) data. It is  
243 unclear whether differences in platform typing technology adversely affect imputation  
244 performance, therefore we first merged the variant calls determined using either dataset by only  
245 including variants that had a very high ( $r^2 > 0.999$ ) level of concordance between overlapping  
246 array and NGS calls. For this first validation step we elected to use HLA\*IMP:02 for  
247 imputation given the explicit design to handle missing data and the reported high performance  
248 in populations of African descent<sup>22</sup>. We found that there was very little difference in allele  
249 concordance estimates between calls derived from either NGS or genotype in populations

250 where we had both calls available (ACB, ASW and YRI) (**Fig. 2B**). Therefore we proceeded to  
251 build the imputation panel and algorithm based on HLA\*IMP:02, using the merged  
252 genotype/NGS variant calls and accounting for higher resolution HLA allele calls. We called  
253 this new system HLA\*IMP:02G. We then compared the performance of three algorithms for  
254 imputation compared to MiSeq typing as Gold Standard and using a five-fold cross-validation  
255 approach. The compared algorithms and reference panels were HLA\*IMP:02G (the new  
256 system using MiSeq HLA calls and variant calls derived from genotyping and NGS), the  
257 original HLA\*IMP:02 algorithm using a multi-ethnic reference panel, and a recently developed  
258 multi-ethnic imputation reference panel (the Broad multi-ethnic (ME) HLA panel)<sup>23</sup>. Only calls  
259 to 2-field (4-digit) resolution were available for HLA\*IMP:02 and overall we observed a  
260 significant improvement in calling at all loci with the new HLA\*IMP:02G algorithm compared  
261 to HLA\*IMP:02 (**Fig. 2C** with performance statistics available in **Additional Tables 2 and 3**).

262 The exceptions to this were HLA-A in Burkinabe individuals, as well as HLA-DRB4 and -  
263 DRB5 across all populations which are known to be minimally polymorphic. In keeping with  
264 our observation of increased differentiation at HLA-DP loci, we observed the greatest increase  
265 in performance for HLA-DPB1 where the mean concordance using HLA\*IMP:02 was 0.42,  
266 increasing to 0.92 with HLA\*IMP:02G. In contrast, for our comparison with the Broad ME-  
267 HLA panel we compared 6-digit ‘G’ resolution calls and although we still observed consistent  
268 improvements with HLA\*IMP:02G, some alleles were called as effectively using the ME-HLA  
269 panel (such as HLA-A, HLA-B, and HLA-DRB1, **Fig. 2D** with statistics available in  
270 **Additional Table 4**). The most significant improvements between algorithms were again seen  
271 for HLA-DPB1 (mean with ME-HLA 0.74 vs 0.92), HLA-DPA1 (0.79 vs 0.97) and HLA-  
272 DQB1 (0.80 vs 0.96). These results support not only the inclusion of diverse populations in  
273 African-specific reference panels to substantially improve the performance of population-  
274 specific HLA allele imputation, but also highlight the benefit of targeted typing in some

275 individuals to further refine population-specific signals. Our results also demonstrate that it is  
276 possible to incorporate genotype variants of differing technology backgrounds that may be used  
277 for imputation without adversely affecting imputation quality.

### 278 *Fine-mapping HLA association results with vaccine antigen responses*

279 We used our imputed HLA results to test for association between the 71,297 variants, 164 HLA  
280 alleles and 2,809 HLA amino acid residues with a minor allele frequency >0.01 before  
281 employing step-wise fine-mapping to identify 12 statistically significant ( $P_{\text{pooled}} \leq 5 \times 10^{-9}$ )  
282 novel associations with each of the vaccine traits mapping to multiple HLA class II loci.

283 Stepwise conditional regression results are shown in **Figs. S2A-S2C** and the final results after a  
284 combination of manual and automated regression modelling are provided in **Fig. 3** with the  
285 statistics provided in **Table S7** and with evidence of heterogeneity provided in **Table S8**. We  
286 observed that each of the traits exhibited multiple, independent association signals that were  
287 best explained by either HLA alleles, SNPs or amino acids each in different HLA genes. For  
288 diphtheria, for example, we found that the same SNP as identified in the first round of analysis  
289 (rs34951355) provided the smallest  $P$ -value and explained the association most

290 parsimoniously. In contrast, PT was best explained by two independent associations: the same  
291 SNP as identified in the genotype-only GWAS (rs73727916), and the presence of the amino  
292 acid glutamine at position 74 of HLA-DRB3 (DRB3-Gln,  $\beta_{\text{univariate}}=-0.31$ ,  $P_{\text{univariate}}=4.2 \times 10^{-25}$ )  
293 which exhibited effects in opposite directions. The FHA association was best explained by  
294 two HLA alleles (HLA-DRB1\*15:03:01G and HLA-DRB1\*08:04:01), whereas both PRN and  
295 HBsAg were explained by four independent associations spanning HLA-DRB1, and HLA-DQ  
296 and HLA-DP amino acids respectively. For those primary associations where there was little  
297 evidence of heterogeneity we found that individuals carrying HLA-DRB1\*08:04:01 had 1.5x  
298 greater FHA antibody levels than those who did not carry this allele (geometric mean titre 6.30  
299 EU/ml (95% confidence interval 5.14-7.73) compared to 4.24 EU/ml (4.04-4.46)). We also  
300 observed that individuals carrying HLA-DRB1\*11:02:01 had 1.8x greater PRN antibody levels

301 than those who did not (22.98 EU/ml (17.31-30.51) vs 12.97 EU/ml (12.27-13.71)), and  
302 individuals carrying DRB1-74Arg had 0.6x less HBsAg antibody than those not carrying the  
303 allele (69.21 mIU/ml (50.94-94.21) vs 106.84 mIU/ml (97.48-117.09)).

304 To put our association findings in the context of public health we used other data available  
305 from the African infants to understand the impact of genetic variation on vaccine  
306 immunogenicity compared to other important variables available from our datasets. We  
307 explored the proportion of variance explained by variables including time between vaccination  
308 and sampling (included as a covariate in all GWAS models), sex, weight-for-length z-score at  
309 birth, and HIV status for each cohort and vaccine response where available, and compared  
310 these to the proportion of variance explained by the HLA genetic variants for each antibody  
311 trait (**Fig. 4A**). We found that the contribution of genetic associations consistently outweighed  
312 the impact of other variables except that of the time between vaccination and sampling.

313 Overall we observed little effect of sex or weight-for-length on the variance when measured at  
314 the time in our study, and although the proportion of variance explained by HIV status across  
315 each of the populations was minimal, the small number of individuals infected with HIV at  
316 birth in Uganda did have significantly lower levels of antibody against all tested vaccine  
317 responses with the exception of FHA (**Fig. 4B**). The mean proportion of variance explained by  
318 the HLA variants across the three tested populations was 5.7% (range 1.5%-10.9%) for PT,  
319 6.1% (1.6%-13.8%) for FHA, 10.4% (9.3%-11.4%) for PRN, 4.3% (1.2%-7.0%) for DT and  
320 7.1% (5.2%-9.1%) for HBsAg emphasising the importance of genetics impacting overall  
321 response to multiple vaccines in infancy.

### 322 *Correlating vaccine immunogenicity and effectiveness through genetic associations*

323 Given the observed impact of genetic variants on antibody response, we next aimed to  
324 understand these genetic associations in the context of vaccine effectiveness. Genetic analyses  
325 of cohorts of vaccine failures are rarely available, largely attributable to the success of

326 vaccines and the challenges in identifying, recruiting and sampling individuals with recorded  
327 vaccine failure. A large independent case-control genetic association study of self-reported  
328 pertussis (defined as the characteristic whooping cough) is, however, available and was  
329 undertaken using data from vaccinated adolescents and young adults in the United Kingdom  
330 who had received pertussis vaccine<sup>24</sup>. Comparing our pertussis antigen vaccination genetic  
331 association results to those from this pertussis GWAS, we found strong evidence of a negative  
332 correlation between the effect estimates for both SNPs (**Fig. S3A**) and amino acid residues  
333 (**Fig. 5A**) on antibody responses to PT, and susceptibility to pertussis (for amino acid residues,  
334 where more complete data were available, Pearson's  $r=-0.83$ ,  $P_{perm}<1\times 10^{-8}$  after  $10^8$   
335 permutations (**Fig. 5B**)). No such correlation was observed for either SNPs (**Figs. S3B** and  
336 **S3C**) or amino acid residues (**Figs. S3D-S3G**) in association testing with the other two  
337 pertussis antigen responses in our study: PRN (amino acid  $r=-0.02$ ,  $P_{perm}=0.57$ ) or FHA  
338 (amino acid  $r=-0.01$ ;  $P_{perm}=0.91$ ). The observed amino acid correlation persisted after stringent  
339 correction for LD (**Fig. S3H**).

340 Since the majority of participants in the UK-based pertussis analysis were likely to have  
341 received a pertussis vaccine, these data provide evidence that i) both PT-specific antibody  
342 responses and risk of post-vaccination pertussis exhibit significant associations with genetic  
343 variation, ii) the genetic architecture of PT responses and pertussis are negatively correlated  
344 and thus iii) it is likely that PT is a key correlate of efficacy in pertussis and iv) these effects  
345 are consistent across populations of diverse ancestry. Although the variants identified as most  
346 relevant for PT in our study in African children were not all available in the pertussis study,  
347 the most significantly associated risk variant in the pertussis analysis (an arginine at position  
348 233 in HLA-DRB1) had an odds ratio of 1.38. The same variant alone accounts for 6.1% of  
349 variance of PT antibody response in the UG cohort demonstrating the potential importance of  
350 genetic variation on both antigen immunogenicity and vaccine effectiveness. This allele is

351 common, with a frequency of 35% of the UK population, and 48% in our tested African  
352 populations suggesting that, if confirmed, the effects could be significant in most populations  
353 of the world.

#### 354 *Testing effects of HLA associations on follicular-helper T-cells*

355 In comparison to autoimmune conditions where HLA associations are recognised but the  
356 driving antigens are less well defined, our observed HLA associations with vaccine responses  
357 offer the opportunity to explore the underlying mechanisms of genetic associations given the  
358 explicit knowledge of driving antigens. We first sought to test whether we could confirm the  
359 observed association between HLA and PT response in an independent cohort and whether we  
360 could provide evidence that this effect persisted through the relevant antigen presentation-T cell  
361 axis. To achieve this, we elected to use a genetic variant that was known to affect both PT  
362 response and pertussis susceptibility and would be readily available through HLA typing.  
363 However, we had to decide between an HLA-DRB3 variant that was most associated in our  
364 antibody analysis but was not present in the published analysis of pertussis, and an HLA-DRB1  
365 variant that was both typed and found significantly associated with the tested traits in both  
366 studies. We therefore accessed a component of the individual-level pertussis GWAS data  
367 (Avon Longitudinal Study of Parents and Children; ALSPAC) and performed dedicated  
368 imputation of HLA-DRB3 in this cohort. We found that although a negative correlation was  
369 still observed across HLA-DRB1 amino acids in this cohort ( $r=-0.55$ ,  $P_{\text{perm}} < 1 \times 10^{-5}$ ), there was  
370 no such signal across HLA-DRB3 ( $r=0.13$ ,  $P_{\text{perm}}=0.16$ ). Thus, allowing for the assumption that  
371 the genetic architectures of PT response and pertussis susceptibility are linked functionally,  
372 these results from our multi-ethnic multi-phenotype analyses suggest that the functional variant  
373 is most likely to reside in HLA-DRB1. The most significantly associated HLA-DRB1 variant in  
374 both studies is the aforementioned position 233, which may be either an arginine (DRB1-  
375 233Arg) as described earlier, or a threonine (DRB1-233Thr). Arginine is found in this position  
376 in alleles such as HLA-DRB1\*11:02:01 ( $P_{\text{pooled}}=3.2 \times 10^{-7}$ , beta -0.32, SE 0.06 from our African

377 vaccine GWAS of PT response) and the threonine in allele groups such as HLA-  
378 DRB1\*15:03:01G, ( $P_{\text{pooled}}=4.3 \times 10^{-11}$ , beta 0.30, SE 0.05), associated with lower and higher  
379 antibody responses respectively. We therefore stratified individuals from an independently  
380 recruited set of individual from studies in the United States (hereafter referred to as the ‘Sette  
381 studies’) into two groups based on whether they carried an arginine or a threonine at this  
382 position 233 in HLA-DRB1. We compared levels of antigen-specific follicular-helper T-cells  
383 ( $T_{\text{FH}}$ )<sup>25</sup> between individuals in the Sette studies homozygous for alleles encoding either residue  
384 at this HLA-DRB1 position (**Fig. S3I and Table S9**). We found that individuals carrying a  
385 threonine had, on average, a 1.2 fold greater ratio of pertussis:tetanus toxin specific  $T_{\text{FH}}$   
386 compared to individuals carrying arginine (one-tailed Mann-Whitney  $P=0.007$ ; **Fig. 5C**).  
387 Despite these associations, we found no evidence of differences in the affinity (**Fig. 5D**) or  
388 breadth (**Table S10**) of PT peptide binding defined by residues at position 233 of HLA-DRB1  
389 using *in silico* peptide-binding methods. Thus, these data provide evidence in favor of the  $T_{\text{FH}}$ -  
390 B cell axis being a key pathway involved in differential pertussis vaccine response and  
391 protective efficacy mediated through the HLA-DRB1 locus although these data go against the  
392 model of improved antigen-specific peptide binding driving these effects.

### 393 *HLA expression quantitative trait loci in Africa correlating with vaccine responses*

394

395 Given, firstly, the observations that, for PT, HLA binding may not be the predominant  
396 mechanism driving an activation of antigen-specific T-cells, and secondly, for DT, the signal  
397 was almost exclusively explained by a SNP (rs34951355) alone with no obvious link to  
398 peptide-binding, we next aimed to test the hypothesis that HLA gene expression may play a  
399 role in driving these traits. We developed two expression quantitative trait loci (eQTL)  
400 resources to test this hypothesis. The first resource was designed as a well-powered tool,  
401 representative of African population immune cells. We combined available HLA-wide  
402 genotypes with RNA sequence data derived from immortalized lymphoblastoid cell lines

403 from many of the same individuals included from our imputation reference panel from  
404 1000Gp3 (n=655 from 6 African populations with the significance of SNPs on *cis*-expression  
405 of genes provided in **Fig. 6A** and **Additional Data Table 5**). Such an analysis has  
406 traditionally been challenging owing to difficulty mapping polymorphic reads to a single  
407 European ancestry reference genome but our method of using a personalized reference  
408 sequence with high resolution data allowed a sensitive detection of eQTLs across 4 genes in  
409 particular: *HLA-A*, *HLA-C*, *HLA-DRB1* and *HLA-DPB1*. Secondly, to allow an improved  
410 understanding of the cell-specific impact of variants we applied the same bioinformatics  
411 pipeline to a published *ex vivo* cell-specific eQTL dataset<sup>26</sup> including 13 cell types (naïve and  
412 activated lymphocytes and monocytes and NK cells). Inspecting the correlation between *P*-  
413 values for variants modulating expression of *HLA-DRB1* between cell types (those with –  
414  $\log_{10}(P) \geq 3$ , **Fig 6B**) we see a high level of correlation for some cell types (stimulated CD4  
415 and CD8 T-cells  $\rho = 0.93$ , and monocytes and naïve B-cells  $\rho = 0.78$  as examples), whereas  
416 for others the correlation was poor (monocytes and NK cells  $\rho = -0.12$ ). Using these  
417 datasets, we first inspected the DT associated variant which was a nucleotide substitution  
418 located within intron 1 of *HLA-DRB1* with the minor allele associated with reduced DT  
419 antibody levels. The index variant itself was not called with high confidence across all  
420 populations in our eQTL datasets, and therefore we assessed the impact of another variant in  
421 LD (rs545690952,  $r^2 = 0.80$  located in intron 2 of *HLA-DRB1*,  $P_{pooled} = 3.0 \times 10^{-27}$ ,  $\beta = -0.49$ ,  
422  $SE = 0.05$  from the African infant DT GWAS) on expression of *HLA* transcripts. We found  
423 that the alternate guanine allele of rs545690952 was associated with statistically significant  
424 downregulated expression of *HLA-DRB1* ( $P_{meta} = 1.6 \times 10^{-4}$ , **Fig. 6C**) and *HLA-DQB1*  
425 ( $P_{meta} = 3.9 \times 10^{-5}$ ) suggesting that variation in DT response may be mediated by changes in  
426 *HLA* gene expression. In the cell specific datasets, we found the only significant effect of  
427 rs545690952 on *HLA-DRB1* expression was in monocytes in the same direction ( $P = 6.3 \times 10^{-3}$ ,



428 **Fig. 6D**) consistent with a cell-specific effect in one of the most critical antigen presenting  
429 cells present in the circulation. A non-significant trend of association in the same direction  
430 was observed with naïve B-cells which is consistent with our observed signature correlations,  
431 the derivation of lymphoblastoid cell lines from B-cells, and the known antigen presentation  
432 ability of this cellular subset.

433 For PT, we aimed to test the hypothesis of gene expression in the independent peak that we  
434 had shown earlier was associated with T-cell activation in the absence of binding effects and  
435 where HLA-DRB3 was unlikely to play a functional role. In the cluster of associated variants,  
436 the nucleotide most associated with PT was rs72851029 ( $P_{\text{pooled}}=6.6 \times 10^{-25}$ ) where the  
437 alternate thymine allele was associated with decreased PT antibody response (**Fig. 6E**),  
438 decreased *HLA-DRB1* expression in the African lymphoblastoid cell lines ( $P_{\text{meta}}=1.25 \times 10^{-22}$ )  
439 and decreased *HLA-DRB1* expression in monocytes in our cell-specific analysis in pattern  
440 consistent with a recessive inheritance ( $P=5.0 \times 10^{-4}$  **Fig. 6F**). Altogether these data provide  
441 further evidence that *HLA-DRB1* expression may play a major role in influencing pertussis  
442 and diphtheria antibody responses, as well as potentially in risk of pertussis following  
443 vaccination with acellular pertussis vaccine.

## 445 **Discussion**

446 Vaccines are one of the most successful public health interventions of the modern era.  
447 Despite their effectiveness spanning multiple infectious diseases, many challenges remain in  
448 ensuring their continued success. Exemplar challenges include understanding the mechanisms  
449 of breakthrough infections occurring despite vaccination, following pertussis vaccination for  
450 example, in addition to the challenges with developing vaccines against infections including  
451 TB and HIV. Here we investigated the impact of human genetic variation on vaccine  
452 immunogenicity and effectiveness for key vaccines integral to the EPI in African infants. We

453 found that genetic variation across the HLA is strongly associated with variable antibody  
454 responses against five of the eight vaccine antigens measured in our study. We then  
455 developed a dedicated HLA imputation resource using accurate high-resolution MiSeq typing  
456 and fine mapped the signals of association to a variety of HLA variants and alleles. Using a  
457 variety of approaches we found evidence that variants in HLA-DRB1 are associated with  
458 increased PT-specific T<sub>FH</sub> activity and, thus, in turn increased antibody production and  
459 ultimately protection against whooping cough. However, we found less evidence of an effect  
460 mediated through predicted binding but instead, more evidence of an effect mediated through  
461 *HLA* gene expression, which was also found for DT antibody responses.

462 Together, our results provide substantial evidence of an influence of human genetic variation  
463 on multiple vaccines delivered to infants worldwide that until now have only been  
464 appreciated reproducibly for vaccinations targeting hepatitis B<sup>27,28</sup>, meningitis C<sup>11</sup> and  
465 measles<sup>29</sup>, although only hepatitis B has well characterised associations across the HLA. The  
466 mechanisms underlying such associations have always been elusive and traditionally have  
467 been suspected to be predominantly driven by peptide binding<sup>30</sup>. To attempt to understand  
468 potential mechanisms in more detail we typed HLA alleles in as many individuals as possible  
469 to improve confidence in direct allele calling and downstream imputation in African  
470 populations. Although we observed a significant level of novelty in protein coding alleles we  
471 did not observe these to occur at levels greater than 5% meaning that imputation and  
472 association testing for common alleles was still an appropriate method of analysis. Overall,  
473 however, given the significant differentiation of alleles across the continent, there remained  
474 substantial benefit to including individuals from as many populations as possible to improve  
475 imputation performance. As was expected by using allele calls derived within our test dataset,  
476 the performance of imputation using our HLA\*IMP:02G algorithm and reference panel was  
477 excellent, however it is worthwhile to note that a newly available imputation resource<sup>23</sup>

478 performed equivalently at multiple loci of anticipated medical importance.

479 Having access to the high-resolution HLA calls not only had benefits for imputation and fine-  
480 mapping the associated variants, but also for generating high confidence calls of eQTLs  
481 across the locus for *HLA* genes. Differential expression of *HLA-C* has been linked with  
482 susceptibility to HIV disease progression but there are limited datasets available for  
483 characterising HLA expression at multiple points across the locus. Our multi-population,  
484 personalised, multi-gene and multi-cell type HLA eQTL resource highlights the potential  
485 importance of this mechanism for vaccine responses that may act on its own or  
486 synergistically alongside peptide binding or other peptide processing defects in a number of  
487 traits as is already being recognised in autoimmunity<sup>31</sup>.

488 The clinical relevance of our work is multi-fold. Firstly, if further shown to be true, our  
489 results would suggest that expression of *HLA* genes may be a significant driver in differential  
490 vaccine response. Adjuvantation is well recognised to boost immune responses that may in  
491 part be due to increased expression of *HLA* genes<sup>32</sup> but the cell-specific effect of such  
492 methods are poorly characterised. It may be that more appropriate targeting of adjuvantation  
493 for vaccines such as pertussis may help boost universal protection and reduce risks of  
494 breakthrough. Secondly, although population scale differences are unlikely with pertussis  
495 (because the frequencies of the linked alleles in UK and African populations were very  
496 similar), it is highly plausible that HLA associations could have greater relevance for some  
497 populations more than others. Risks of breakthrough infection may be more common in some  
498 populations owing to genetic differences and thus consideration of these differences may be  
499 important for future vaccine delivery. Finally, if the impact of genetic variation on the  
500 effectiveness of vaccination was higher for vaccines other than pertussis or diphtheria (HIV  
501 for example), then it would be even more important to identify these associations *a priori*  
502 before making statements about individual level, or population-scale vaccine effectiveness.

503 The potential limitations of our work include the varied nature of both the methods used for  
504 HLA typing or inference and the heterogeneous nature of the cohorts used for the vaccine  
505 response genetic association studies, which could all affect the interpretation of our results.  
506 We explicitly designed the study to allow cross-correlation between HLA allele calls defined  
507 by Sanger sequence, short-read MiSeq and long-read PacBio sequencing methods. Even in  
508 these relatively understudied populations our results are in agreement with all work  
509 undertaken in other populations demonstrating that most inconsistencies between platforms  
510 would be explained by differential exon coverage and that when described to exonic  
511 sequence level, most alleles had already been reported. Thus, the short-read MiSeq offered  
512 the most cost-effective scalable method to type large numbers of individuals to a consistent  
513 standard. Given the possibility of expression effects modulating functional responses, the  
514 future exploration of intronic variants, which are more likely to directly regulate expression,  
515 will be substantially improved by long-read sequencing technologies. As reference databases  
516 accumulate more long-range sequences, the full contribution of coding and non-coding  
517 variants to downstream functional effects will become more apparent. Our findings highlight  
518 the importance of the HLA-DP locus in particular. These were not only observed to be  
519 significantly differentiated worldwide, but were also found to be significantly associated with  
520 HBsAg in line with several previous reports<sup>27,33,34</sup>. Together with increasing reports of an  
521 HLA-DP association with other viral infections including SARS-CoV2<sup>35</sup>, these results  
522 highlight the growing importance of understanding the diversity and cellular function of this  
523 locus in multiple populations. Finally, although the cohorts included in the vaccine response  
524 GWAS were selected to represent diverse geographical and environmental exposure  
525 backgrounds, many of the effect estimate signals were remarkably homogeneous with the  
526 best example being the HLA-DRB1 signals observed for HBsAg. Significant heterogeneity  
527 was observed for some association signals including the index HLA-DR signal observed with

528 PT where a null association was observed for the SA cohort. This absence of association  
529 could be related to the use of an acellular as opposed to a whole-cell vaccine in South Africa  
530 which is the only obvious difference in vaccine delivery, or could be as a result of a yet  
531 unidentified genetic or other population cause of heterogeneity. These issues also highlight  
532 the ongoing challenges with reliably fine-mapping association signals clearly across such  
533 diverse populations. As demonstrated for pertussis, the most likely causal variant from our  
534 *VaccGene* cohort statistically was an HLA-DRB3 amino acid residue, but, when combining  
535 our data with that of a related phenotype from a UK dataset, we found near-equivalent  
536 evidence that the signal was instead linked to an HLA-DRB1 variant that could equally alter  
537 peptide binding or gene expression. Given many acknowledged challenges of fine mapping in  
538 this complex locus, our work demonstrates that further understanding will only come from  
539 improved resource availability and a multiplicity of technical approaches to reliably pin-point  
540 the underlying mechanism.

541 In conclusion, our results demonstrate that variation of HLA gene expression is likely to play  
542 a role as part of a multi-faceted set of mechanisms influencing important biological  
543 processes. Resources such as our collective African genetic and transcriptomic datasets may  
544 be key to understanding multiple genetic associations across the HLA with traits of  
545 importance across Africa within a functional context.

#### 546 **Acknowledgments**

547 We thank all sample donors who contributed to this study and staff involved in consenting,  
548 sample and data collection and preparation includes interviewers, computer and laboratory  
549 technicians, clerical workers, research scientists, volunteers, managers, receptionists and nurses.

550 **Funding:** This project has received funding from the European Research Council (ERC) under  
551 the European Union's [Seventh Framework Programme (FP7/2007-2013)] (grant agreement No  
552 294557).

553 This work was supported by the Wellcome Trust grant numbers 064693, 079110, 095778,  
554 217065, 202802 and 098051.

555 AJM was supported by an Oxford University Clinical Academic School Transitional Fellowship  
556 and a Wellcome Trust Clinical Research Training Fellowship reference 106289/Z/14/Z and the  
557 National Institute for Health Research (NIHR) Oxford Biomedical Research Centre (BRC).

558 NJT is a Wellcome Trust Investigator (202802/Z/16/Z), is the PI of the Avon Longitudinal Study

559 of Parents and Children (MRC & WT 217065/Z/19/Z), and is supported by the University of  
560 Bristol NIHR Biomedical Research Centre (BRC-1215-2001), the MRC Integrative  
561 Epidemiology Unit (MC\_UU\_00011) and works within the CRUK Integrative Cancer  
562 Epidemiology Programme (C18281/A19169).

563 Computation used the BMRC facility, a joint development between the Wellcome Centre for  
564 Human Genetics and the Big Data Institute supported by the NIHR Oxford BRC.

565 Financial support was provided by the Wellcome Trust Core Award Grant Number  
566 203141/Z/16/Z.

567 Computational support and infrastructure was also provided by the “Centre for Information and  
568 Media Technology” (ZIM) at the University of Düsseldorf (Germany).

569 The UK Medical Research Council and Wellcome (Grant ref: 217065/Z/19/Z) and the  
570 University of Bristol provide core support for ALSPAC.

571 This publication is the work of the authors and NJT will serve as guarantor for the contents of  
572 this paper. GWAS data for ALSPAC was generated by Sample Logistics and Genotyping  
573 Facilities at Wellcome Sanger Institute and LabCorp (Laboratory Corporation of America) using  
574 support from 23andMe. The cellular immunology studies were supported by National Institute of  
575 Health grants U19 AI118626 (AS) and U01 AI141995 (AS/BP).

576 The views expressed are those of the author(s) and not necessarily those of the NHS, the NIHR or  
577 the Department of Health.

578

#### 579 **Author contributions:**

580 Conceptualization: AJM, DG, BP, AS, RN, AME, GM, AVSH, MSS

581 Methodology: AJM, DG, BP, AS, RN, AME, GM, AVSH, MSS

582 Analyses: AJM, ATD, MP, DG, DB, EK, TC, RdSA, SP, GS, SW, HK, CSLA,  
583 AR, DK, TP, KA, KE, TM. KE, NE, SP

584 Resource generation and data curation: AJM, MP, DG, TC, AM, CC, AD, HK, CP,  
585 NC

586 Funding and Supervision: AJM, KJ, FRMvdK, PK, BP, AS, NC, RN, SS, SM,  
587 AME, GM, AVSH, MSS

588 Writing—original draft: AJM, ATD, MP, DG, DB, EK, TC, GM, AVSH, MSS

589 Writing—review & editing: all authors

590

591 **Competing interests:** Authors declare no competing interests.

592

593 **Data and materials availability:** All data are available in the main text or the  
594 Supplementary Materials or in the European Genome-Phenome Archive under accession:  
595 EGAS00001000918.

596

597

## Figures

### Fig. 1. HLA associations with diverse vaccine responses in African infants and the diversity of HLA alleles across Africa.

(A) A schematic of the experimental design for the VaccGene project genotyping DNA from 2,499 infants across three African sites and testing for association with eight vaccine antibody responses. (B) A regional association plot of pooled genetic association statistics of imputed and directly genotyped variants tested for association with five vaccine antigen responses demonstrating unique patterns of association across the class II HLA region. Points are coloured by linkage disequilibrium ( $r^2$ ) with the index variant in each analysis across all three populations: red (0.8-1), orange (0.6-0.8), green (0.4-0.6), blue (0.2-0.4) and grey (<0.2). (C) Schematic of experimental design to call HLA allelic diversity using DNA from 1,597 individuals across nine sites in Africa and two admixed African-American populations. (D) The proportion of individuals in each population with novel alleles confidently called using either MiSeq or PacBio calling pipelines. Total numbers of typed individuals can be found in **Table S5**. (E) Measures of differentiation between African populations for eight *HLA* genes across class I and II loci. Estimates, in  $G_{ST}$ , are between pairs of populations with the first population represented as the colour and the second as a shape allowing a determination of the combination of populations through colour and shape. (F) Pattern of differentiation of HLA-DPB1 2-digit alleles with frequencies plotted as pie-charts by population across Africa. ACB: African Caribbean in Barbados; ASW: African Ancestry in Southwest USA; BF: Burkina Faso; ESN: Esan in Nigeria; GWD: Gambian in Western Division, The Gambia – Mandinka; LWK: Luhya in Webuye, Kenya; MKK: Maasai in Kinyawa, Kenya; MSL: Mende in Sierra Leone; SA: South Africa; UG: Uganda; YRI: Yoruba in Ibadan, Nigeria.

624

625

**Fig. 2. Imputing HLA alleles in African populations using a continental reference panel.**

626

627

628

629

630

631

632

633

634

635

636

637

638

639

640

641

(A) Schematic of approach to build and test a novel reference panel and adapted algorithm for imputation of HLA alleles in Africa. (B) The first stage involved testing for differences in imputation performance (using the original HLA\*IMP:02 algorithm) with individuals from four African populations with variant data called by array genotyping or next-generation sequence data (NGS). Points are concordance estimates between imputed and MiSeq called HLA alleles for each gene locus. The box plot centre line represents the median; the box limits, the upper and lower quartiles; and the whiskers are the 1.5x interquartile range. (C) HLA imputation performance (measured as locus-specific concordance between alleles called to 2-field (4-digit) resolution) in the VaccGene populations using the traditional method and reference set (HLA\*IMP:02) clustering by locus and population. Results are compared to the performance of our enhanced high-resolution algorithm and reference data-set (HLA\*IMP:02G) using the same individuals divided into validation and test groups using a five-fold cross-validation approach. Means of performance and 95% confidence intervals are plotted for each comparison. Full statistics are available in **Additional Data Tables 2, 3 and 4**. (D) HLA imputation performance comparing results from the Broad multi-ethnic reference panel to that from HLA\*IMP:02G called to 6-digit 'G' resolution.

642

643

644

ACB: African Caribbean in Barbados; ASW: African Ancestry in Southwest USA; LWK: Luhya in Webuye, Kenya; YRI: Yoruba in Ibadan, Nigeria.



645

646 **Fig. 3 HLA associations with vaccine responses fine-mapped to HLA variants.**

647 Forest plots of effect estimates (points) for fine-mapped variants for each trait colored by  
648 population (Uganda as red, South Africa blue and Burkina Faso green) with 95% confidence  
649 intervals (bars) and corresponding distributions for the pooled linear mixed model ('Pooled' –  
650 solid black horizontal line) and fixed effects meta-analyses ('Fixed Meta'). Variants were deemed  
651 to be independently associated with each trait using combined manual and automated regression  
652 approaches. Dashed vertical black lines represent no effect (beta=0) and solid vertical red lines  
653 cross the beta estimate of the Pooled model as a reference. The originating locus of association is  
654 represented by solid arrowed lines colored by trait indicating the relevant region of association on  
655 chromosome 6. Associations demonstrating significant evidence ( $PQ \leq 1 \times 10^{-3}$ ) of heterogeneity  
656 are highlighted with a red asterisk (\*). Pertactin was not administered to South African infants  
657 hence there are no measured effects for this population. PT: pertussis toxin, FHA: pertussis  
658 filamentous hemagglutinin; PRN: pertussis pertactin; DT: diphtheria toxin; HBsAg, hepatitis B  
659 surface antigen.

660

661

662

663

**Fig. 4 Assessing the impact of genetics and other exposures on magnitude of vaccine response in VaccGene.**

664

665

666

667

668

669

670

671

672

(A) The proportion of variance explained ( $r^2$ ) by genetic variants (those fine mapped to be most relevant as in Fig 3 for each antibody trait), time in weeks between last vaccine and sampling for antibody assay, sex (male vs female), HIV status (uninfected (U), exposed (E) or infected (I) at birth) and z weight-for-length score at birth, were available in each tested cohort. (B) Distributions of antibody responses stratified by HIV status at birth in Ugandan (UG) and South African (SA) individuals with differences tested between strata using the Wilcoxon rank test. The box plot centre line represents the median; the box limits, the upper and lower quartiles; and the whiskers are the 1.5x interquartile range. \*  $P < 0.05$ ; \*\*  $P < 0.01$ ; \*\*\*  $P < 0.001$ .

673

674 **Fig. 5 Mechanisms associated with HLA-mediated responses and vaccine failure.**

675 (A) The beta effect estimates for association between HLA amino acid residues and PT  
676 antibody response in the VaccGene infants are plotted against the equivalent estimates from a  
677 case-control association study of self-reported pertussis. Residues are colored by HLA gene  
678 (light green HLA-A; rose HLA-B; lavender HLA-C, orange HLA-DQA1; dark green HLA-  
679 DQB1 and gold HLA-DRB1). (B) Distributions of Pearson's  $r$  coefficient following 100,000  
680 permutations to measure the significance of correlation between effect estimates of HLA amino  
681 acids pruned by LD comparing responses against PT and against the pertussis GWAS. Pearson  
682 correlation coefficients were calculated after relabelling of the whooping cough GWAS variants  
683 generating the null distribution. The correlation coefficients determined using the true datasets  
684 are represented with a vertical arrow. (C) Ratio of circulating pertussis:tetanus toxin (PT:TT)  
685 specific  $T_{FH}$  in donors of known HLA-DRB1 type divided by the index HLA-DRB1 variant  
686 associated with PT antibody response and pertussis self-report. Antigen- specific  $T_{FH}$  cells are  
687 represented as a proportion of all cells categorized as Antigen Inducible Marker (AIM+) cells.  
688 (D) Predicted affinities for top PT-derived peptides predicted to bind to alleles with those  
689 containing a threonine at position 233 of HLA-DRB1 ('DRB1-233Thr') compared to those with  
690 an arginine ('DRB1-233Arg') calculated from the immune epitope database. The box plot  
691 center line represents the median; the box limits, the upper and lower quartiles; and the  
692 whiskers are the 1.5x interquartile range. \*\*  $P < 0.01$ ; NS not significant  
693

694  
695  
696  
697  
698  
699  
700  
701  
702  
703  
704  
705  
706  
707  
708  
709  
710  
711  
712  
713  
714  
715  
716

**Fig. 6 Mapping cis-eQTLs across the HLA in diverse immune cells.**

(A) Variants with evidence of being *cis*-expression quantitative trait modulators are plotted by position across the HLA against evidence of significance of impacting expression of four *HLA* transcripts. Only variants with significant evidence ( $P < 5 \times 10^{-8}$ ) are colored by gene with the remainder in grey. RNA sequence data from lymphoblastoid cell lines were mapped to personalized *HLA* gene sequences derived from high-resolution typing. (B) The correlation in *P*-value estimates for variants predicted to be *cis*-eQTL variants in different cell types from the DICE dataset. 10 of 13 cell types are presented with scatter plots in the lower half of the table and Spearman rho estimates in the upper half. (C) Effect of a variant in LD with the index DT-associated variant on levels of *HLA-DRB1* in four populations (ESN, GWD, LWK, MKK) with more than a single observation in each genotype category. A plot of the data from the pooled set of four populations is shown for each gene. The x-axes numbers refer to the number of copies of the minor G allele compared to the major T in each group of individuals per population. (D) The effect of this same variant on *HLA-DRB1* expression in circulating monocytes, naïve B-cells, naïve CD4 and CD8 T-cells and natural killer (NK) cells from the DICE study demonstrating a consistent direction of effect in monocytes. (E) The effect of alternate T alleles of rs72851029 on PT antibody response in the African infant GWAS with significance tested in a recessive model. (F) The effect of rs72851029 on *HLA-DRB1* expression in monocytes with significance tested using a recessive model. The box plot center line represents the median; the box limits, the upper and lower quartiles; and the whiskers are the 1.5x interquartile range. \*\*  $P < 0.01$ , \*\*\*  $P < 0.001$ , NS: not significant.

## 717 **Materials and Methods**

### 718 *Experimental Design and Study populations*

719 The objectives of this study were to 1) test for association between genetic variation and antibody  
720 response to eight vaccine antigens delivered in infancy, 2) characterise the major *HLA* genes in a  
721 large collection of African populations using a range of sequence technologies, 3) use this  
722 resource to develop and test a population-specific HLA imputation panel, 4) use the high-  
723 resolution characterization to understand the likely functional mechanisms underlying these  
724 measured vaccine responses. The African populations included in this study include seven  
725 populations characterized as part of the 1000 Genomes phase 3 (1000Gp3) project, the Maasai  
726 from the HapMap collection, and three other populations recruited as part of the *VaccGene*  
727 initiative. The analyses used genotype data, described in more detail below, derived from array-  
728 based and / or next-generation sequence data alongside HLA allele information for all included  
729 populations. Association analyses were undertaken using only *VaccGene* populations  
730 incorporating array-derived genotype data alongside HLA allele types, vaccine antibody  
731 responses and clinical demographic data.

### 732 *1000 Genomes Phase 3 and HapMap Collections*

733  
734 The collection, genotyping and sequencing of the seven 1000Gp3 African populations have  
735 already been described (36) and all data are publically available  
736 (<http://www.internationalgenome.org/>). These populations include individuals from African  
737 Caribbeans in Barbados (ACB), Americans of African Ancestry in Southwest USA (ASW), Esan  
738 in Nigeria (ESN), Gambian in Western Divisions in the Gambia (GWD) of Mandinka ethnicity,  
739 Luhya in Webuye, Kenya (LWK), Mende in Sierra Leone (MSL) and Yoruba in Ibadan, Nigeria  
740 (YRI)). DNA was extracted from samples of publically available immortalized lymphoblastoid  
741 cell lines (LCLs) selected from unrelated individuals from these 1000Gp3 populations and from  
742 the Maasai in Kinyawa, Kenya (MKK) derived from the HapMap project<sup>37</sup>. The resultant DNA  
743

744 was used for short and long read HLA gene sequencing and typing. DNA from the MKK was also  
745 sequenced across the genome using short-read sequencing with all methods described in further  
746 detail below.

#### 748 [VaccGene populations](#)

749 Participants included in the *VaccGene* study were recruited from three African countries selected  
750 partly due to their geographic dispersal across the continent and partly due the availability of high  
751 quality metadata and biological samples relevant to infant vaccination. These sites were in  
752 Uganda, South Africa and Burkina Faso. Individuals from each of the cohorts were included if  
753 their dates of birth, vaccination and blood sampling were available and if it was confirmed that  
754 they had received three doses of vaccines including diphtheria toxin (DT), tetanus toxin (TT),  
755 pertussis antigens, *Haemophilus influenzae* (Hib), and hepatitis B surface antigen (HBsAg) and a  
756 single dose of measles virus (MV) vaccine. The receipt of vaccines was confirmed through  
757 referencing the vaccination cards of infant participants or documented administration of vaccines  
758 by the research teams where relevant. Beyond exclusion criteria involved in preliminary  
759 recruitment of the individuals, no further exclusion occurred based on gender, ethnicity, HIV  
760 exposure or any other health status. A range of clinical and demographic metadata were collected  
761 from the three cohorts including the number of illnesses during the first year of life, details  
762 regarding the pregnancy and parental occupations and self-reported ethnicities (**Table S1**). A  
763 more detailed description of each of these populations follows below.

765 *Uganda: The Entebbe Mother and Baby Study (EMaBS)*: EMaBS is a prospective birth  
766 cohort that was originally designed as a randomized controlled trial to test whether anthelmintic  
767 treatment during pregnancy and early infancy was associated with differential response to  
768 vaccination or incidence of infections such as pneumonia, diarrhea or malaria  
769 (<http://emabs.lshtm.ac.uk/>)<sup>38</sup>. EMaBS originally recruited 2,507 women between 2003 and 2006;

770 2,345 livebirths were documented and 2,115 children were still enrolled at 1 year of age. Pregnant  
771 women in the second or third trimester were enrolled at Entebbe Hospital antenatal clinic if they  
772 were resident in the study area, planning to deliver in the hospital, willing to know their HIV  
773 status and willing to take part in the study. They were excluded if they had evidence of possible  
774 helminth-induced pathology (severe anemia, clinically apparent liver disease, bloody diarrhea), if  
775 the pregnancy was abnormal, or if they had already enrolled during a previous pregnancy. The  
776 mothers and infants underwent intensive surveillance during the first year of infant life. Blood  
777 samples were taken and stored from both mother and cord blood around the time of birth.  
778 Samples, including whole blood, were then obtained from the child annually.<sup>39</sup>. All infants under  
779 follow up had a sample of whole blood collected annually on or around their birthday (2-5 ml  
780 depending on the age). The child's samples were subsequently divided into plasma and red cell  
781 pellets as described in more detail below. Infants were included in the present study if 1) receipt  
782 of three doses of DTwP/Hib/HBV (at approximately 6, 10 and 14 weeks of age) and one dose of  
783 MV vaccine (at 9 months of age) could be confirmed as being administered by the research team  
784 or from their vaccination records 2) DNA could be extracted from stored red cell pellets 3)  
785 plasma samples were available from the 12 month age point of sampling. Informed written  
786 consent was re-acquired from the mothers or guardians, and where appropriate consent from the  
787 child and assent from the guardian or mother, specifically for the genetic component of this study.  
788 Ethical approval was provided locally by the Uganda Virus Research Institute (reference  
789 GC/127/12/07/32) and Uganda National Council for Science and Technology (MV625), and in  
790 the UK by London School of Hygiene and Tropical Medicine (A340) and Oxford Tropical  
791 Research (39-12 and 42-14) Ethics Committees.

792  
793 *South Africa: The Soweto Vaccine Response Study:* Six-month infants born in Chris Hani  
794 Baragwanath Hospital living in the Soweto region of Johannesburg, South Africa were identified

795 from screening logs and databases of participants involved in vaccine clinical trials<sup>40</sup> coordinated  
796 by the Vaccine and Infectious Diseases Analytics (Wits-VIDA) Unit (<https://wits-vida.org>).  
797 Mothers of the infants were approached if the infants had received all of their vaccines up to six  
798 months of age (DTaP/Hib/HBV at approximately 4, 8 and 12 weeks of age). After receiving  
799 information about the study the mothers were consented in accordance with ethical approval from  
800 the University of Witwatersrand Human Research Ethics Committee (reference M130714) and  
801 the Oxford Tropical Research Ethics Committee (1042-13 and 42-14). The infants were sampled  
802 prospectively at six months of age and at 12 months after receipt of MV vaccine at 9 months.  
803 Single whole blood samples were collected and prepared using a similar protocol to that used in  
804 Entebbe to extract DNA from cell pellets and plasma for antibody assays.

805

806 *Burkina Faso: The VAC050 ME-TRAP Malaria Vaccine Trial:* Infants between the ages of 6  
807 and 18 months living in the Banfora region of Burkina Faso were recruited into a Phase 1/2b  
808 clinical trial to test the safety, immunogenicity and efficacy of an experimental heterologous  
809 viral-vectored prime-boost liver-stage malaria vaccine<sup>41</sup>. These infants were all expected to  
810 receive their EPI vaccines (DTwP/Hib/HBV) as part of the usual national schedule at 4, 8 and 12  
811 weeks of age. Infants were precluded from participating in the trial if they were found to have  
812 clinical or hematological (venous hemoglobin less than 8 g/dL) evidence of severe anemia,  
813 history of allergic or neurological disease or malnutrition. Of a total of 730 infants that were  
814 recruited into the study following informed and written consent from the mother, samples suitable  
815 for extraction of DNA were collected and stored from 400 infants (350 vaccine recipients and 50  
816 recipients of a control rabies vaccine). Samples of plasma were available from the infants at  
817 multiple time-points following the experimental vaccine receipt. Samples from individuals taken  
818 at time points as close to the 12-month age as possible were prioritized for EPI vaccine response  
819 measurements. The infants underwent intensive clinical history and examination during screening



820 and follow-up. The mothers of the participating infants provided consent for their children to be  
821 enrolled in the clinical trial and for subsequent genetic studies to be undertaken for all vaccines  
822 received in accordance with ethical approval from the Ministere de la Recherche Scientifique et  
823 de l'Innovation in Burkina Faso (reference 2014-12-151) and the Oxford Tropical Research  
824 Ethics Committee (41-12).

825

#### 826 [Avon Longitudinal Study of Parents and Children](#)

827 Genotype data was available from ALSPAC as described previously<sup>24,42,43</sup> and selected using the  
828 fully searchable data dictionary and variable search tool

829 (<http://www.bristol.ac.uk/alspac/researchers/our-data/>). Consent for biological samples was collected  
830 in accordance with the Human Tissue Act (2004) and ethical approval for the study was obtained  
831 from the ALSPAC Ethics and Law Committee and the Local Research Ethics Committees.

832

#### 833 *Laboratory methods*

##### 834 [1000Gp3 and HapMap DNA extraction](#)

835 Commercially available plates of DNA extracted from LCLs (ACB: MGP00016; ASW:  
836 MGP00015; ESN: MGP00023; GWD: MGP00019; LWK: MGP00008; MSL: MGP00021; YRI:  
837 MGP00013) and individual aliquots of DNA from cell lines of MKK samples (**Table S4**) were all  
838 acquired from Coriell Institute for Medical Research (New Jersey, USA).

839

##### 840 [VaccGene blood sampling and preparation](#)

841 Whole blood was sampled into vacutainer tubes (BD, Becton Dickinson and Company, New  
842 Jersey, USA) containing ethylenediaminetetraacetic acid (for the Ugandan and South African  
843 studies) or lithium heparin (Burkinabe) as an anticoagulant. Following centrifugation the samples  
844 were separated into their constituent parts (plasma, buffy coat and red cell / erythrocyte layers)  
845 and stored at -80°C until downstream analysis in batches. DNA was extracted from the  
846 erythrocyte layer in the Ugandan study and from the buffy coat in South African and Burkinabe

847 studies. DNA from all cohorts was extracted from the relevant samples using Qiagen QIAamp  
848 DNA Mini or Midi Kits (Qiagen, Hilden, Germany) using recommended protocols. Whole blood  
849 was also sampled into serum separator tubes (SST; BD, New Jersey USA) in the Ugandan study  
850 and serum was isolated and stored according to the recommended protocols.

851

### 852 [HLA classical allele typing](#)

853 6-digit ‘G’ resolution HLA typing was performed for all African samples using a commercial  
854 platform developed by Histogenetics (Ossining, New York, USA). Whole gene long-read  
855 sequencing was performed using PacBio technology for a subset of African individuals and loci.  
856 A more detailed description of exons typed and nomenclature can be found in the  
857 **Supplementary Text**. Exon targeted MiSeq (Illumina, California, USA) sequencing was  
858 performed by Histogenetics (Ossining, New York, USA) following preparation of libraries from  
859 individual DNA according to MiSeq protocols with two amplification rounds tagging adaptor and  
860 index sequences followed by sequencing on a MiSeq machine according to manufacturer  
861 protocols. The resultant fastq files were processed and typed using proprietary HistoS and  
862 HistoTyper softwares (Histogenetics, New York, USA)<sup>44</sup> using IMGT/HLA Release 3.25.0 July  
863 2016. Gene-targeted PacBio sequencing was undertaken by HistoGenetics on the RS II using  
864 standard protocols with a FastQ file produced from the SmartAnalysis pipeline. Subsequent  
865 typing results were generated using the proprietary HistoS and HistoTyper reporting softwares<sup>44</sup>.  
866 Sequence reads achieved a depth of at least 100x coverage of the targeted exons. A subset of 90  
867 individuals from Uganda were also typed using Sanger-sequence based HLA typing performed by  
868 an accredited tissue typing laboratory at Addenbrooke’s Hospital, Cambridge University  
869 Hospitals NHS Foundation Trust using the proprietary uTYPE software version 7 (Fisher  
870 Scientific, Pittsburgh, USA). The list of possible ambiguous calls were minimized by using the  
871 ‘allele pair’ export function in this software which lists all possible and permissible allele pair  
872 possibilities for each locus for each individual. Alleles were defined using the IMGT/HLA

873 Release: 3.22.0 October 2015. Best-call allele pairs for each locus in each individual were  
874 determined based on local guidelines prioritizing alleles that were ‘Common and Well-  
875 Documented’ (CWD)<sup>45</sup> but any genotype inconsistencies were highlighted and inspected  
876 manually for potential evidence of novel mutation. In a subset of the 1000Gp3 populations, allele  
877 calls were available from a previous round of lower resolution (4-digit or 2-field) typing using  
878 Sanger sequencing<sup>46</sup>. These calls were used to test reliability of typing and estimate reductions in  
879 ambiguity calls for African, CHS and GBR individuals.

880

### 881 [Quantitative vaccine response antibody assays](#)

882 Three validated multiplex immunoassays were used to measure antibody concentrations against a  
883 number of vaccine antigens in the three *VaccGene* populations. Briefly, this method measures  
884 total IgG against each respective antigen including functional (e.g. neutralizing) as well as non-  
885 functional antibodies. Antibodies against DT, TT, pertussis toxin (PT), pertactin (PRN),  
886 filamentous haemagglutinin (FHA), and MV were determined in the MDTaP assay which is a  
887 combination of two previously described assays<sup>47,48</sup>. Antibodies against Hib polysaccharide were  
888 determined in the HiB assay<sup>49</sup>. For MV and DT the correlation of the multiplex immunoassay to  
889 gold standard functional assays is high<sup>50,51</sup>. The immunoassay uses Luminex technology  
890 (Luminex Corporation, Austin, Texas, USA) that depends on conjugation of commercially  
891 available or in-house developed antigens to fluorescent carboxylated beads using a two-step  
892 carbo-diimide reaction to covalently link each antigen to a uniquely fluorescing bead. For the  
893 MDTaP assay, serum samples were diluted 1/200 and 1/4000 in phosphate buffered saline  
894 (PBS)/Tween-20/3% bovine serum albumin and incubated with the beads to allow the binding of  
895 any antibody present in the medium whilst minimizing background in a manner similar to a  
896 monoplex solid-phase enzyme-linked immunosorbent assay (ELISA). The bead-antigen-antibody  
897 complexes were then separated from remaining plasma or serum through the use of a vacuum  
898 manifold before washing with PBS and incubating with a further anti-human IgG antibody

899 conjugated to R-phycoerythrin (R-PE), and washing again prior to detection in the Luminex flow  
900 cytometer. The HiB assay was performed similarly, with the exception that samples were diluted  
901 1/100 in 50% antibody depleted human serum (ADHS). The cytometer was used to firstly detect  
902 the identity of the fluorescently labelled bead (and therefore antigen bound), and then secondly to  
903 detect the fluorescence intensity of R-PE (related to the concentration of primary antibody in  
904 solution) bound to each bead passing through the detection channel<sup>48</sup>. The final concentration of  
905 bound antibody was calculated by determining the median fluorescence intensity of the antigen-  
906 specific beads and using diluted standards to calculate the concentration in international units for  
907 each antigen. ELISA results were available for MV vaccine and TT antibody responses from a  
908 subset of the Entebbe participants as performed as part of the early investigation undertaken in the  
909 Ugandan cohort<sup>38</sup>. Hepatitis B surface antigen (HBsAg) responses were measured using the anti-  
910 HBs kit on the ABBOTT Architect i2000 using recommended protocols (Abbott Laboratories,  
911 Chicago IL, USA).

912

### 913 [Genome-wide genotyping](#)

914 SNP Genotyping was undertaken for the three *VaccGene* populations using the Illumina  
915 HumanOmni 2.5M-8 ('octo') BeadChip array version 1.1 (Illumina Inc., San Diego, USA),  
916 performed by the Genotyping Core facilities at the Wellcome Sanger Institute (WSI). Genomic  
917 DNA underwent whole genome amplification and fragmentation before hybridization to locus  
918 specific oligonucleotides bound to 3µm diameter silica beads. Fragments were extended by single  
919 base extension to interrogate the variant by incorporating a labelled nucleotide enabling a two-  
920 color detection (Illumina, 2013). Genotypes were called from intensities using two clustering  
921 algorithms (Illuminus and GenCall) in GenomeStudio (Illumina Inc., San Diego, USA)  
922 incorporating data from proprietary pre-determined genotypes.

923

## 924 Whole-genome sequencing of MKK

925 Whole-genome sequencing to a 30x coverage was undertaken for the MKK using the Illumina  
926 HiSeq X platform using a PCRfree library preparation with a PhiX control spike-in on a barcoded  
927 tag. Basecalling was performed on the instrument by using Illumina's sequencing control software  
928 (SCS version 3.3.76) and the realtime analysis (RTA) software. The resulting basecalls were  
929 converted directly to unmapped BAM format using the WSI's BAMBI software (version 0.9.4)  
930 for injection into our mapping pipeline. The mapping pipeline first removes any adaptor sequence  
931 from the SEQ portion of the read and annotates it as an AUX tag to be replaced in the SEQ after  
932 mapping as a soft clipped sequence. A spatial filter was next generated for the lane to remove any  
933 bubble induced artefacts from the flowcell by mapping the Phi-X sequence to the reference using  
934 BWA MEM (version 0.7.15-r1140) and using this to create a mask to remove any contiguous  
935 blocks of spatially oriented INDELs using our spatial filter program (pb\_calibration  
936 version 10.27) after alignment. Meanwhile the human data was mapped to HS38dh using BWA  
937 MEM (version 0.7.15-r1140). The output from this process was then converted from SAM to  
938 BAM using scramble (version 1.14.8); headers were corrected using samtools reheader  
939 (version 1.3.1-npg-Sep2016); and then the data was sorted and had duplicates marked using  
940 biobambam (version 2.0.65). Any stray PhiX reads were removed using AlignmentFilter (version  
941 1.19) and the resulting CRAM file was delivered to our core IRODS facility for storage and  
942 transfer to the EGA.

943  
944 Single sample variant calling to GVCF format was performed using GATK HaplotypeCaller  
945 (version 3.8-0-ge9d806836). GVCFs were combined into a single GVCF using  
946 GATK CombineGVCFs (version 2017-11-07-g45c474f) and then the final VCF callset was  
947 created using GATK GenotypeGVCFs and genomic coordinates lifted over to build 37 using  
948 LiftOver.

## RNA sequencing of 1000Gp3 lymphoblastoid cell lines

A custom RNA-Seq read alignment approach was used to identify expression quantitative trait loci (eQTLs) for the *HLA* genes. The HLA region presents a major challenge in determining RNA-Seq based gene expression quantification due to the abundance of paralog sequences that are highly polymorphic. We therefore aligned the short RNA-Seq reads to a reference sequence defined per individual, complemented with alternative HLA alleles in order to improve the mapping of the reads. The eQTL analysis involved the quantification of expression of the following 9 *HLA* genes: HLA-A, HLA-B, HLA-C, HLA-DQA1, HLA-DQB1, HLA-DPA1, HLA-DPB1, HLA-DRB1 and HLA-DRB5.

RNA sequencing was undertaken using existing LCLs from 600 unrelated samples from five African populations in the 1000 Genomes Project, including the 97 LWK, 84 MSL, 112 GWD, 99 ESN, 42 YRI from 1000Gp3 as well as 166 MKK from the HapMap project. Cell lines were retrieved from Coriell in pre-assigned batches. In order to reduce batch effects the samples were divided into batches for sequencing representative of all six populations. Cell cultures were expanded and  $1 \times 10^7$  cells/line were pelleted, treated with RNAProtect (Qiagen) and stored at  $-80^\circ\text{C}$  until shipment. Following further randomization, RNA extraction from the entire pellets was performed by Hologic/Tepnel Pharma Services using the RNeasy PLUS mini kit (Qiagen). Library preparation was then performed using the standard automated Kapa stranded mRNA library preparation protocol, followed by RNA sequencing on the HiSeq 2500 using paired end sequencing with 75bp reads. The sequencing was carried out at the Wellcome Sanger Institute where 12 samples, randomised across populations, Coriell batches and Hologic RNA extraction batches were sequenced over two lanes to ensure adequate coverage to quantify gene expression whilst minimising systematic bias.

## 975 Follicular helper T-cell assay

976 An Antigen Inducible Marker (AIM) method was used to measure and compare proportions of  
977 circulating antigen-specific T<sub>FH</sub> cells in the circulating blood of donors defined by HLA-DRB1  
978 allele carriage. The AIM assay uses flow-cytometry to detect proportions of antigen-specific  
979 follicular helper T (T<sub>FH</sub>) cells defined as co-expressing CD25, OX40 and CXCR5 markers  
980 following *ex-vivo* antigen stimulation of PBMC<sup>25</sup>. Based on HLA-DRB1 allele type, 1x10<sup>6</sup>  
981 PBMCs were selected from stored samples collected from consenting participants recruited into  
982 studies coordinated by the laboratory of Professor Alessandro Sette investigating  
983 immunodominant peptides associated with responses against pertussis<sup>52</sup>, tuberculosis<sup>53</sup>, dengue  
984<sup>54</sup>, and IgE allergy<sup>55</sup>. The samples were thawed and cultured with 30µg/ml PT (Reagent proteins,  
985 USA), 5µg/ml DT (Reagent proteins, USA), 5µg/ml TT (List Biological Laboratories Inc.,  
986 Campbell, CA), 10 µg/ml phytohaemagglutinin (PHA, Sigma, St Louis, MO, USA), or toxoid  
987 diluent (water) at 37°C for 24 hours. The cells were then washed, labelled with an antibody panel  
988 for 15 minutes at 4°C before being fixed with paraformaldehyde (Sigma, St Louis, MO, USA) and  
989 acquired on an LSRII (Becton, Dickinson and Company, New Jersey, USA). The antibody panel  
990 was as follows: CCR7-PerCP-Cy5.5 (G043H7), OX40-PE-Cy7 (BerACT35), CXCR5-Brilliant  
991 Violet 605 (J252D4) all from Biolegend, San Diego, USA; CD45RA-eFluor450 (HI100), CD4-  
992 APC-eFluor780 (RPA-T4) from eBioscience, San Diego, USA; CD25-FITC (M-A251), CD14-  
993 V500 (M5E2), CD19-V500 (HIB19), CD8-V500 (RPA-T8) from BD Biosciences, San Jose,  
994 USA; LIVE/DEAD Aqua stain (Thermo-Fisher Scientific, Waltham, USA). Data derived from  
995 the gating strategy was analysed using FlowJo Software version 10 (FlowJo LLC, Oregon, USA)  
996 and either one-tailed Wilcoxon rank sum or linear regression statistical tests were performed in R.  
997 All participating donors were known either to have received DT and TT, and either whole cell  
998 (wP together known as DTwP) or acellular pertussis (aP, together as DTaP) as part of a vaccine  
999 study undertaken in the Sette lab, or self-reported having received standard vaccines during  
1000 childhood.

1001

1002 **Cell-specific HLA-wide eQTL analyses**

1003 HLA typing was performed on DNA extracted from the Database of Immune Cell eQTLs (DICE)

1004 dataset<sup>56</sup> using the same Histogenetics MiSeq protocol described above.

1005

1006 *Analytical methods*

1007 **SNP quality control (QC)**

1008 SNP QC was performed separately for each genotyped *VaccGene* cohort using identical steps and

1009 using SNPs mapped to Human Genome Build 37. Low quality variants that mapped to multiple

1010 regions within the human genome or did not map to any region were removed. Samples with a

1011 call rate of less than 97% and heterozygosity greater than 3 standard deviations around the mean

1012 were filtered sequentially. Sex check was performed in PLINK (v1.7) using default F values of

1013 <0.2 for males and >0.8 for females<sup>57</sup>. Samples with discordance between reported and genetic

1014 sex were removed. Genetic variant filtering was performed across the remaining samples and sites

1015 called in <97% samples were removed from each population. Identity-by-descent (IBD) was

1016 measured within each population. Only samples with IBD >0.9 not known to be twins were

1017 removed using a custom algorithm that removed the sample from the pair with the lower variant

1018 call rate. Sites in Hardy Weinberg disequilibrium ( $P < 10^{-8}$ ) were also excluded from future analysis

1019 in all individuals, calculated using individuals with IBD <0.05 (hereafter designated ‘founders’).

1020 Following the above quality control steps, principal component analysis (PCA) was performed in

1021 EIGENSOFT v4.2<sup>58</sup> for each population and combined with populations representative of other

1022 parts of Africa (the ‘AGV dataset’<sup>20,59</sup>) or global populations including 1000 Genomes<sup>60</sup> (‘Global

1023 + AGV dataset’). PCA was carried out after LD pruning to a threshold of  $r^2 = 0.5$  using a sliding

1024 window approach with a window size of 50 SNPs sliding 5 SNPs sequentially. Regions of long

1025 range LD were removed from the analysis. Individuals with values of the first 10 principal

1026 components more than six standard deviations around the mean of other samples in each

1027 population were removed.



1028

1029 [Genotype imputation](#)  
1030 Haplotype phasing was undertaken in each *VaccGene* population separately using SHAPEIT2<sup>61,62</sup>  
1031 with standard parameters and the advised effective population size of 17,469. We subsequently  
1032 used IMPUTE2 to estimate unobserved genotypes using a combined reference panel consisting of  
1033 the 1000Gp3 reference panel<sup>60</sup> combined with data from the African Genomes Variation Project<sup>20</sup>  
1034 and a 4x whole genome sequence coverage dataset of another Ugandan population of 2000  
1035 individuals entitled the UG2G dataset: 1000G/AGVP/UG2G<sup>20</sup>.

1036

1037 [Cohort genotype variant merging](#)  
1038 A high quality set of autosomal genotype calls free of batch effects were required for a number of  
1039 downstream analyses. Variant calls derived from a combination of array genotyping (Illumina  
1040 omni2.5M passing QC in the *VaccGene* and some 1000Gp3 cohorts) and next-generation  
1041 sequencing (NGS) for other 1000Gp3 populations (using only calls at sites intersecting with  
1042 omni2.5M typed locations) were defined. A comparison of variant calls between array and NGS  
1043 platforms was undertaken for a subset of 1000Gp3 individuals who had data from both platforms  
1044 using concordance. Only those sites with concordance estimates of  $r^2 > 0.99$  were taken forwards  
1045 for further analyses. Variants typed on the omni2.5M array were called in all individuals using  
1046 array genotypes as first priority (where data was available from both array and NGS platforms)  
1047 and then using NGS data (if array data was not available). Once variant calls were available for  
1048 all individuals, these variants were used to calculate principal components and ADMIXTURE  
1049 analysis across all autosomes to ensure that there was minimal evidence of batch variation caused  
1050 by a differential use of NGS or array variants across individuals and populations.

1051

1052 [Measuring differentiation of HLA alleles across African and global populations](#)  
1053  $G_{ST}$  was calculated for each locus using alleles described in 2-, 4- and 6-digit resolution using the  
1054 ‘diveRsity’ package in R<sup>63</sup>.  $G_{ST}$  and Jost’s  $D$  statistic<sup>64</sup> are statistics explicitly designed for multi-

1055 allelic residues. Both statistics were calculated but given the close correlation between the two  
1056 outputs, the availability of  $G_{ST}$  statistics in other studies of HLA in Africa<sup>65</sup> made this the statistic  
1057 of choice. Allelic richness was calculated in diveRsity using bootstrap sampling (1000 samples)  
1058 with replacement to estimate the average number of alleles observed with standard errors given  
1059 the differing number of individuals observed in each population and the likelihood of observing  
1060 rare alleles.

#### 1061 [Vaccine antibody response normalization](#)

1062 Measured antibody responses were normalized using both logarithmic and inverse normalization  
1063 (INT) in R version 3.5.1. Inverse normalized traits were tested for association with a variety of  
1064 available metadata endpoints to determine covariates to include in the final regression model to  
1065 increase power in the quantitative analysis<sup>66</sup>. Endpoints included time between vaccination and  
1066 sampling, sex, age, weight-for-length z score at birth, number of illnesses, socio-economic status  
1067 and HIV status (if known). Only time between vaccination and sampling was used in the final  
1068 models. INT trait measures were used throughout our analyses and all results reported as such.

#### 1070 [Intra-cohort genotype association testing and meta-analysis](#)

1071 Multiple software packages are available that can account for population structure and cryptic  
1072 relatedness in genomic association studies through the use of mixed model approaches<sup>67</sup>.  
1073 However, until recently only a handful of these algorithms could simultaneously account for  
1074 probabilities of imputation accuracy in large datasets. We therefore applied a mixed model in our  
1075 association analyses implemented in the GEMMA software<sup>68</sup> that explicitly accounts for imputed  
1076 genotypes. We calculated the relatedness matrices using only those autosomal variants directly  
1077 typed in each population. Inclusion of the first 10 principal components did not affect the  
1078 association statistics for any tested phenotype in any cohort as would be expected given that these  
1079 models explicitly account for population structure and relatedness and so these PCs were not  
1080

1081 included in any downstream association testing. The METASOFT software was used to undertake  
1082 fixed and random effect meta-analysis to test for shared signals of association across  
1083 populations<sup>69</sup>.

1084

#### 1085 [HLA imputation and HLA reference panel construction](#)

1086 The HLA\*IMP:02 software was used for imputing classical HLA alleles to 2- and 4-digit  
1087 resolution at all 11 loci in *VaccGene* individuals with available genotype data<sup>22</sup>. HLA\*IMP:02  
1088 was used preferentially above other software including SNP2HLA<sup>70</sup> and HIBAG<sup>71</sup> because of 1)  
1089 the inclusion of individuals of West African ancestry in the reference panel of HLA\*IMP:02 and  
1090 reported accuracies of imputation of individuals from diverse population backgrounds<sup>22</sup>, 2) the  
1091 explicit handling of missingness of types between individuals and 3) the adaptability of the  
1092 algorithm by our team to allow for higher resolution types and amino acid imputation. Imputation  
1093 of HLA alleles in the African and UK (ALSPAC) populations was performed a) using the March  
1094 2016 release of the HLA\*IMP:02 reference panel using default settings to establish a baseline for  
1095 accuracy and b) using an African-specific reference panel with algorithmic modifications,  
1096 described below. The ‘best-guess’ call was defined for each diploid allele in every individual  
1097 using the output from the algorithm in the presence or absence of an imposed threshold for calling  
1098 using the posterior probability of 0.7. It has been proposed that imposing this threshold improves  
1099 the quality of the total number of calls at the expense of reducing the total number of available  
1100 calls. In downstream association analyses, this posterior probability was used as variant dosages  
1101 to account for probabilities in regression analyses.

1102

1103 The African-specific reference panel was built using only variants (derived from publically  
1104 available array genotype or whole-genome sequence data for 1000Gp3 and MKK populations or  
1105 array genotypes for the *VaccGene* populations as described above) and 6-digit ‘G’ calls from the  
1106 1,705 typed individuals. Five-fold cross validation, comprising five random splits of the reference

1107 dataset into training (four-fifths of the data) and validation (one-fifth of the data) sets, was carried  
1108 out to evaluate expected imputation accuracy on African samples. For each split, accuracy in the  
1109 validation set was assessed using the metrics described below. All imputations used for  
1110 association analyses were based on the complete reference panel.

1111

1112 Comparisons between imputed vs typed calls were undertaken at the 4-digit (i.e. 2-field) level of  
1113 resolution. If an available call at a single allele locus included several potential higher resolution  
1114 alleles (i.e. a list of potential ambiguities) only the first available allele call from either platform  
1115 (adhering to a CWD priority) were used for comparison. In the cases of comparing imputed HLA  
1116 calls to typed calls, any 6-digit 'G' type calls were reduced to 4-digit and treated as the 'truth' set.  
1117 By comparing each individual allele in turn it was possible to define calls of the test platform that  
1118 were:

- 1119 • True positives (*TP*)
- 1120 • False positives (*FP*); called by the test platform as that allele when it was in fact another  
1121 allele according to the truth)
- 1122 • False negatives (*FN*; called by the test platform as another allele when it was in fact this  
1123 allele)
- 1124 • True negatives (*TN*).

1125 Thus at the level of an individual allele various metrics could be calculated. Sensitivity was  
1126 defined as:

$$1127 \quad TP / (TP + FN)$$

1128 Specificity was defined as:

$$1129 \quad TN / (TN + FP)$$

1130 Positive predictive value (PPV) was defined as:

$$1131 \quad TP / (TP + FP)$$

1132 Negative predictive value (NPV) was defined as:

$$1133 \quad TN / (TN + FN)$$

1134 Accuracy was defined as:

$$1135 \quad (TP + TN) / (TP + FP + FN + TN)$$

1136

1137 Concordance was calculated at the level of the locus. For every pair of chromosomes with data  
1138 available in both truth and test sets the number of identical allele calls between platforms was  
1139 calculated and divided by the total number of alleles, equivalent to the positive predictive value  
1140 (PPV). Any individual with missing alleles on either or both chromosomes on either platform  
1141 were excluded from these calculations.

1142

1143 HLA imputation using the Broad Multi-Ethnic panel was performed using the Multi-Ethnic HLA  
1144 reference panel (version 1.0 2021) available on the Michigan imputation server using  
1145 recommended settings<sup>23</sup>.

1146

#### 1147 [Pooled linear mixed model and HLA variant association testing](#)

1148 In order to undertake conditional analyses including all genotyped and imputed genotype variants  
1149 across the HLA locus in addition to HLA allele and amino acid variants across all three  
1150 populations we leveraged the intra-cohort normalized, quantitative nature of the antibody  
1151 responses and combined all individual level genetic data from individuals in all three *VaccGene*  
1152 populations maintaining imputation dosages where appropriate. For HLA alleles and amino acids,  
1153 posterior probabilities were used to infer imputation dosages at each allele. We calculated a  
1154 relatedness matrix using only directly genotyped autosomal variants from the three populations  
1155 and we then undertook association testing using dosages in GEMMA to account for imputation  
1156 probabilities in the context of both imputed genotypes and HLA alleles and amino acid variants.  
1157 The resultant *P*-value association statistics were then compared to output from the fixed effects

1158 meta-analysis approach determined using METASOFT using the Pearson correlation coefficient.  
1159 Step-wise forward conditional modelling was used for each trait including the index SNP dosages  
1160 as fixed effect covariates in the model to assess for evidence of interdependence whilst taking  
1161 differential LD patterns into account across all populations.

1162

### 1163 [Fine-mapping HLA associations with each trait](#)

1164 An approach similar to that used by Moutsianas and colleagues investigating the effect of HLA in  
1165 multiple sclerosis<sup>72</sup> was used to compare and contrast the results of both manual and automated  
1166 step-wise linear modelling approaches. First, stepwise conditional modelling was performed using  
1167 the pLMM approach in GEMMA for each trait to identify independently associated loci achieving  
1168 a significance threshold of  $P \leq 5 \times 10^{-9}$ . This approach resulted in a range of SNPs, HLA alleles or  
1169 amino acids likely to be independently associated with each trait, frequently spanning multiple  
1170 loci across the class II region. The gene origins of these ‘independent index’ variants were  
1171 determined (SNP or amino acid residues in HLA-DRB1 for example) and the dosages of all  
1172 variants were then incorporated in a manual modelling approach. For this manual approach, a  
1173 refined number of unrelated individuals (IBD<0.2) were selected and models of association were  
1174 tested using additive dosage probabilities for imputed genotype, classical allele and bi-allelic  
1175 amino acid residues across all 11 loci with a population average minor allele frequency (MAF<sub>AV</sub>)  
1176 greater than 0.01. Null models were defined for each trait by including the first five genetic  
1177 principal components and the ‘time between sampling most recent vaccination’ covariate.  
1178 Independent index variants discovered through the pLMM analyses were assessed both in  
1179 *univariate* (i.e. single SNP, HLA allele or bi-allelic amino acid residue variable) models or  
1180 *multivariable* (i.e. defining more than one single SNP, HLA allele or amino acid residue) models.  
1181 Models were rationally tested and compared based on the known associations between amino acid  
1182 residues and classical alleles. For example, an arginine at position 74 in the HLA-DRB1 protein  
1183 (designated DRB1-74Arg) is only found in alleles in the 2-digit HLA-DRB1\*03 allele group.

1184 Using the 6-digit ‘G’ resolution the only allele groups therefore containing DRB1-74Arg include  
1185 HLA-DRB1\*03:02:01 and HLA-DRB1\*03:01:01G. Each model defined using this framework  
1186 was tested and compared. Using the given example, univariate models comparing the DRB1-  
1187 74Arg and HLA-DRB1\*03 variants, and a conditional model including both HLA-  
1188 DRB1\*03:02:01 and HLA-DRB1\*03:01:01G would be compared. All models included the same  
1189 principal components and time covariates as defined in the null model for each trait. The models  
1190 were compared to the null using the likelihood ratio test (LRT) if the models were nested, or  
1191 using the Bayesian Information Criterion (BIC) otherwise. Models with lower BIC values were  
1192 interpreted to explain the variance in the observed data most parsimoniously.

1193

1194 Finally, any prior knowledge from the associations derived from the LMM associations were  
1195 removed and automated bidirectional stepwise model selection based on the BIC was undertaken.  
1196 This modelling was designed to test whether models incorporating amino acid residues or  
1197 classical alleles best explained each trait at each locus and also to determine whether any other  
1198 variants should be considered in a final model other than those identified using the manual  
1199 approach above. A consensus model was then determined based on the results of the manual and  
1200 automated approaches for each trait. Manual and automated modelling steps were performed in R  
1201 3.5.1.

1202

1203 Given the relatively small size of the dataset compared to existing efforts for other diseases  
1204 including multiple sclerosis<sup>17</sup> and inflammatory bowel disease<sup>18</sup> only additive models of  
1205 association were tested. Deviation from additivity or interaction between HLA variants was not  
1206 assessed because our study was likely to have insufficient power to detect such effects.

1207

## 1208 RNA Sequencing and eQTL Analysis

1209 RNA sequencing reads were inspected using the FastQC tool for quality control. Reads were  
1210 trimmed using Cutadapt for polyA and adaptors prior to mapping. The merged set of whole-  
1211 genome genotypes derived from a combination of array and sequencing data from VaccGene,  
1212 1000Gp3 and Hapmap samples was used for the eQTL data analysis. All samples with RNA-Seq  
1213 data available also had genotype data available. Variant calls from both genotype and sequence  
1214 data for these samples were included in eQTL analyses. After accounting for QC of the RNA  
1215 sequence data, there was a total of 558 samples available for the eQTL analysis: ESN (99), GWD  
1216 (112), LWK (97), MKK (126), MSL (83), and YRI (41).

1217  
1218 The RNA-Seq data set was mapped to a custom genome reference sequence that consisted of the  
1219 non-HLA containing human reference sequence (hg38) and HLA containing reference sequence  
1220 unique to each individual. The HLA-containing reference was generated based on the 6-digit ‘G’  
1221 type results of the samples in our dataset. We extracted a total of 285 HLA alleles: 47 HLA-A, 73  
1222 HLA-B, 35 HLA-C, 11 HLA-DPA1, 39 HLA-DPB1, 8 HLA-DQA1, 25 HLA-DQB1, 45 HLA-  
1223 DRB1 and 2 DRB5 nucleotide sequences of exons from the international ImMunoGeneTics/HLA  
1224 database v3.33.0 at the European Bioinformatics Institute. For each HLA allele, we generated a  
1225 sequence where the exons of the respective allele were merged with 200 bases of spacers (N) as  
1226 introns. The exons that were not typed in the ImMunoGeneTics/HLA database for each HLA  
1227 allele were filled using the closest allele. The resulting HLA containing reference contained 285  
1228 HLA gene structures with the corresponding exons and the introns of N characters. We generated  
1229 an annotation file for the HLA-containing reference in the form of a GTF file as well as the exon-  
1230 exon junction file for the mapping. Non-HLA containing reference was generated from the human  
1231 reference sequence (hg38) excluding the alternative haplotype contigs where the 9 HLA genes in  
1232 the reference were removed from the reference sequence by hard masking. We used the  
1233 corresponding Ensemble gene annotation (v83) for the Non-HLA reference sequence. The custom



1234 reference sequence for the RNA-Seq data mapping was generated by merging the non-HLA  
1235 containing reference sequences with the HLA containing reference sequences. The annotations  
1236 and the exon-exon junctions were merged to generate the final gene annotation GTF file for the  
1237 mapping.  
1238  
1239 Alignment was performed using the STAR alignment tool<sup>74</sup> in two-pass mode. Our custom  
1240 reference sequence and the custom gene annotations were used for the indexing of the reference  
1241 sequence for the mapping. During the second pass we used the novel exon-exon junctions as well  
1242 as the exon-exon junctions we generated for the HLA containing reference. The quantification of  
1243 RNA transcripts was strongly affected by reads that mapped to multiple locations in the custom  
1244 reference sequence. Since we had 285 HLA alleles with high similarity in our reference and the  
1245 default maximum number of multiple alignments in STAR aligner is 10 we increased the  
1246 maximum number of multiple alignments to 300 for the RNA-Seq mapping. We counted the  
1247 number of reads mapping to the HLA haplotypes using a custom method using the htlib for  
1248 accessing the alignment files in bam format. We used two criteria to count the reads: 1) If the  
1249 reads were mapped to the multiple HLA haplotypes, but no other regions in the genome, we  
1250 counted these reads as single mapping, 2) If the reads were mapped to a unique HLA allele, the  
1251 reads were counted for that allele. After verifying the reads were mapping to their correctly typed  
1252 HLA alleles, we quantified the gene expression for each HLA gene as the sum of these counts.  
1253 The read counts for the other genes were calculated with htseq-count v0.9.1, using the gene  
1254 annotations from Ensembl as the features. The counts were merged to include the whole set of  
1255 gene counts. Normalization was performed using the DESeq2 tool with the variance stabilized  
1256 transformation<sup>75</sup>. The variance-stabilized transformation was performed after the library size and  
1257 dispersion estimation. Normalization was performed for each population separately.  
1258

1259 eQTL mapping was performed for the 5Mb region that included the nine HLA genes of interest.  
1260 We restricted our search to cis-eQTLs by selecting variants within 1Mb of each gene's start and  
1261 end positions. Per population, cis-eQTLs were identified by linear regression where normalized  
1262 gene expression was regressed on variant dosage correcting for covariates using Matrix eQTL<sup>76</sup>.  
1263 Covariates included population principal components calculated from genotype data, meta-data  
1264 on known technical variables and unobserved confounding variables detected using Surrogate  
1265 Variable Analysis (SVA). Per population for each variant we calculated the *P*-values that are  
1266 corrected using the Benjamini-Hochberg procedure and the beta values. The results of the eQTL  
1267 analysis for six populations were then combined using a fixed effects model implemented by  
1268 METASOFT.

1269  
1270 The same methods were used for the individual cell types using the DICE dataset. This dataset  
1271 included 14 cell types in which the effect of a single variant (rs545690952) was explored. The  
1272 overall significance of association with each cell type was as follows: naïve B-cells (*P*=0.19),  
1273 naïve CD4 T-cells (0.59), stimulated CD4 T-cells (0.36), naïve CD8 T-cells (0.99), stimulated  
1274 CD8 T-cells (0.53), monocytes ( $8.6 \times 10^{-3}$ ), natural killer cells (0.19), T<sub>FH</sub> (0.27), Th1 (0.86), Th2  
1275 (0.68), Th17 (0.07), Th\* (0.42), Tregmem (0.83), Tregnaive (0.56).

1276  
1277 To test the reproducibility of our approach, we replicated a well-characterized eQTL for HLA-C  
1278 associated with differential control of HIV-1<sup>77</sup> in the 1000Gp3 dataset. We observed a strong  
1279 effect of rs2395471 on HLA-C expression in the African populations (*P*= $1.14 \times 10^{-12}$ ) in the same  
1280 direction as reported previously.

1281

## 1282 Trait and genetic correlation

1283 Correlation between normally distributed continuous variables or traits were tested using  
1284 Pearson's correlation coefficient. Equivalent testing for variables or traits not considered

1285 continuous or sufficiently normalized were undertaken using Spearman rank. Testing for the  
1286 significance of correlation between HLA amino acid residues derived from the present study and  
1287 a historical GWAS of self-reported pertussis<sup>24</sup> was performed using permutation. The null  
1288 distribution was calculated by randomly assigning different SNP identities to the calculated beta  
1289 coefficients from the pertussis GWAS and recalculating Pearson's  $r$  between 100,000 to  
1290 100,000,000 times (dependent on whether a  $P$ -value could reliably be calculated). The  $P_{\text{perm}}$  value  
1291 was calculated as the frequency at which a Pearson's  $r$  value calculated from permutation was  
1292 observed to surpass the  $r$  from the true data. These calculations were undertaken using both  
1293 complete variant datasets and datasets pruned by LD (keeping only the top associated SNP and  
1294 those SNPs with  $r^2 < 0.35$ ).

1295

#### 1296 [Peptide binding assays](#)

1297 The Immune Epitope Database (IEDB<sup>78</sup>) was used to test whether the affinity or breadth of  
1298 peptides derived from specific protein sequences differed by groups of HLA alleles defined as  
1299 being associated with increased or decreased antibody responses. The output from the binding  
1300 prediction algorithm included a binding affinity prediction ( $IC_{50}$  - measured in nM) and a  
1301 percentile rank generated by comparing the predicted  $IC_{50}$  against scores of 5,000,000 random 15-  
1302 mers selected from the SWISSPROT database<sup>79</sup>. The percentile rank scores of 15-mer peptides  
1303 derived from PT (GenBank accession ALH76457), DT (BAL14546) and TT (WP\_011100836)  
1304 were compared. The highest affinity peptide per protein and allele was defined using the peptide  
1305 with the lowest percentile score. To increase power to identify differences between groups of  
1306 alleles, all HLA-DRB1 alleles present in the IMGT database were divided into groups dependent  
1307 on their sequences and whether they possessed an excess of residues associated with either  
1308 increased (defined as 'DRB1-233Thr' alleles for PT) or decreased (defined as 'DRB1-233Arg'  
1309 alleles) antibody responses. The definition of these alleles for PT vaccine responses was  
1310 undertaken as follows. Firstly the number of residue positions found to be significantly ( $P < 0.05$ )

1311 associated with either PT (n=39) responses were determined and then alleles were defined as to  
1312 whether they had an excess (>1.5x) of residues associated with either a positive beta or those with  
1313 an excess (>1.5x) of negative beta effect estimates. The distributions of affinities of the top-  
1314 predicted binding peptides for each of the alleles classified as such were then compared and tested  
1315 for differences using a two-tailed Mann-Whitney U test. The breadth of antigen-specific peptide  
1316 binding by class II HLA alleles was defined by measuring the proportion of peptides predicted to  
1317 bind within the top 5th percentile of all peptides from each peptide per allele of interest, compared  
1318 across antigens and allele groups.

1319

1320 *Data availability*

1321 All direct genotypes from *VaccGene* individuals post-quality control alongside imputed data and  
1322 raw and curated HLA sequence data and calls have been submitted to the European Genome-  
1323 Phenome Archive under accession EGAS00001000918. Summary statistics for the genome-wide  
1324 association tests of imputed data for eight vaccine antibody levels are available on Zonodo  
1325 (<https://doi.org/10.5281/zenodo.7357687>).

1326

1327

1328

1329

## 1330 References

- 1331 1. Ozawa, S. *et al.* Return On Investment From Childhood Immunization In Low- And  
1332 Middle-Income Countries, 2011–20. <https://doi.org/10.1377/hlthaff.2015.1086> **35**, 199–  
1333 207 (2017).
- 1334 2. Pollard, A. J. & Bijker, E. M. A guide to vaccinology: from basic principles to new  
1335 developments. *Nat. Rev. Immunol.* 2020 212 **21**, 83–100 (2020).
- 1336 3. Cherry, J. D. Epidemic pertussis in 2012--the resurgence of a vaccine-preventable disease.  
1337 *N Engl J Med* **367**, 785–787 (2012).
- 1338 4. JD, C. The 112-Year Odyssey of Pertussis and Pertussis Vaccines-Mistakes Made and  
1339 Implications for the Future. *J. Pediatric Infect. Dis. Soc.* **8**, 334–341 (2019).
- 1340 5. LK, S., J, V., N, D., DM, L. & OF, O. The status of tuberculosis vaccine development.  
1341 *Lancet. Infect. Dis.* **20**, e28–e37 (2020).
- 1342 6. MB, L. The Promise of a Malaria Vaccine-Are We Closer? *Annu. Rev. Microbiol.* **72**, 273–  
1343 292 (2018).
- 1344 7. DR, B. Advancing an HIV vaccine; advancing vaccinology. *Nat. Rev. Immunol.* **19**, 77–78  
1345 (2019).
- 1346 8. Keehner, J. *et al.* Resurgence of SARS-CoV-2 Infection in a Highly Vaccinated Health  
1347 System Workforce. <https://doi.org/10.1056/NEJMc2112981> (2021).  
1348 doi:10.1056/NEJMC2112981
- 1349 9. Plotkin, S. A. Correlates of protection induced by vaccination. *Clin Vaccine Immunol* **17**,  
1350 1055–1065 (2010).
- 1351 10. Kwok, A. J., Mentzer, A. & Knight, J. C. Host genetics and infectious disease: new tools,  
1352 insights and translational opportunities. *Nature Reviews Genetics* **22**, 137–153 (2021).
- 1353 11. O'Connor, D. *et al.* Common Genetic Variations Associated with the Persistence of  
1354 Immunity following Childhood Immunization. *Cell Rep.* **27**, 3241-3253.e4 (2019).
- 1355 12. Ovsyannikova, I. G. *et al.* A large population-based association study between HLA and  
1356 KIR genotypes and measles vaccine antibody responses. *PLoS One* **12**, e0171261 (2017).
- 1357 13. Trowsdale, J. & Knight, J. C. Major histocompatibility complex genomics and human  
1358 disease. *Annu Rev Genomics Hum Genet* **14**, 301–323 (2013).
- 1359 14. Chapman, S. J. & Hill, A. V. S. Human genetic susceptibility to infectious disease. *Nature*  
1360 *Reviews Genetics* **13**, 175–188 (2012).
- 1361 15. Blackwell, J. M., Jamieson, S. E. & Burgner, D. HLA and infectious diseases. *Clin*  
1362 *Microbiol Rev* **22**, 370–85, Table of Contents (2009).
- 1363 16. Mentzer, A. J. *et al.* Human leukocyte antigen alleles associate with COVID-19 vaccine  
1364 immunogenicity and risk of breakthrough infection. *Nat. Med.* (2022).  
1365 doi:10.1038/S41591-022-02078-6
- 1366 17. Consortium, T. I. M. S. G. Class II HLA interactions modulate genetic risk for multiple  
1367 sclerosis. *Nat Genet* **47**, 1107–1113 (2015).
- 1368 18. Goyette, P. *et al.* High-density mapping of the MHC identifies a shared role for HLA-  
1369 DRB1\*01:03 in inflammatory bowel diseases and heterozygous advantage in ulcerative  
1370 colitis. *Nat Genet* **47**, 172–179 (2015).
- 1371 19. Ramsuran, V. *et al.* Elevated HLA-A expression impairs HIV control through inhibition of  
1372 NKG2A-expressing cells. *Science (80-. )*. (2018). doi:10.1126/science.aam8825
- 1373 20. Gurdasani, D. *et al.* Uganda Genome Resource Enables Insights into Population History  
1374 and Genomic Discovery in Africa. *Cell* **179**, 984-1002.e36 (2019).
- 1375 21. Methods, S. Materials and methods are available in STAR methods.
- 1376 22. Dilthey, A. *et al.* Multi-population classical HLA type imputation. *PLoS Comput Biol* **9**,  
1377 e1002877 (2013).
- 1378 23. Luo, Y. *et al.* A high-resolution HLA reference panel capturing global population diversity  
1379 enables multi-ancestry fine-mapping in HIV host response. *Nat. Genet.* 2021 5310 **53**,

- 1380 1504–1516 (2021).
- 1381 24. McMahon, G., Ring, S. M., Davey-Smith, G. & Timpson, N. J. Genome-wide association  
1382 study identifies SNPs in the MHC class II loci that are associated with self-reported history  
1383 of whooping cough. *Hum. Mol. Genet.* **24**, 5930–5939 (2015).
- 1384 25. Dan, J. M. *et al.* A Cytokine-Independent Approach To Identify Antigen-Specific Human  
1385 Germinal Center T Follicular Helper Cells and Rare Antigen-Specific CD4+ T Cells in  
1386 Blood. *J Immunol* **197**, 983–993 (2016).
- 1387 26. Schmiedel, B. J. *et al.* Impact of Genetic Polymorphisms on Human Immune Cell Gene  
1388 Expression. *Cell* **175**, 1701–1715.e16 (2018).
- 1389 27. Zhang, Z. *et al.* Host Genetic Determinants of Hepatitis B Virus Infection. *Front. Genet.*  
1390 **10**, 696 (2019).
- 1391 28. Akcay, I. M., Katrinli, S., Ozdil, K., Doganay, G. D. & Doganay, L. Host genetic factors  
1392 affecting hepatitis B infection outcomes: Insights from genome-wide association studies.  
1393 *World Journal of Gastroenterology* **24**, 3347–3360 (2018).
- 1394 29. Haralambieva, I. H. *et al.* Genome-wide associations of CD46 and IFI44L genetic variants  
1395 with neutralizing antibody response to measles vaccine. *Hum Genet* **136**, 421–435 (2017).
- 1396 30. Kwok, A. J., Mentzer, A. & Knight, J. C. Host genetics and infectious disease: new tools,  
1397 insights and translational opportunities. *Nature Reviews Genetics* **22**, (2020).
- 1398 31. Gutierrez-Arcelus, M. *et al.* Allele-specific expression changes dynamically during T cell  
1399 activation in HLA and other autoimmune loci. *Nature Genetics* **52**, 247–253 (2020).
- 1400 32. Kooijman, S. *et al.* Novel identified aluminum hydroxide-induced pathways prove  
1401 monocyte activation and pro-inflammatory preparedness. *J. Proteomics* **175**, 144–155  
1402 (2018).
- 1403 33. Kamatani, Y. *et al.* A genome-wide association study identifies variants in the HLA-DP  
1404 locus associated with chronic hepatitis B in Asians. *Nat. Genet.* **41**, 591–595 (2009).
- 1405 34. Nishida, N. *et al.* Genome-wide association study confirming association of HLA-DP with  
1406 protection against chronic hepatitis B and viral clearance in Japanese and Korean. *PLoS*  
1407 *One* **7**, e39175 (2012).
- 1408 35. Low, J. S. *et al.* Clonal analysis of immunodominance and cross-reactivity of the CD4 T  
1409 cell response to SARS-CoV-2. *Science (80-. )*. **372**, 1336–1341 (2021).
- 1410 36. Consortium, G. P. *et al.* A global reference for human genetic variation. *Nature* **526**, 68–74  
1411 (2015).
- 1412 37. Consortium, I. H. *et al.* Integrating common and rare genetic variation in diverse human  
1413 populations. *Nature* **467**, 52–58 (2010).
- 1414 38. Webb, E. L. *et al.* Effect of single-dose anthelmintic treatment during pregnancy on an  
1415 infant’s response to immunisation and on susceptibility to infectious diseases in infancy: a  
1416 randomised, double-blind, placebo-controlled trial. *Lancet* **377**, 52–62 (2011).
- 1417 39. Nash, S. *et al.* The impact of prenatal exposure to parasitic infections and to anthelmintic  
1418 treatment on antibody responses to routine immunisations given in infancy: Secondary  
1419 analysis of a randomised controlled trial. *PLoS Negl. Trop. Dis.* **11**, (2017).
- 1420 40. Nunes, M. C. *et al.* Duration of Infant Protection Against Influenza Illness Conferred by  
1421 Maternal Immunization: Secondary Analysis of a Randomized Clinical Trial. *JAMA*  
1422 *Pediatr* **170**, 840–847 (2016).
- 1423 41. Bliss, C. M. *et al.* Viral Vector Malaria Vaccines Induce High-Level T Cell and Antibody  
1424 Responses in West African Children and Infants. *Mol Ther* **25**, 547–559 (2017).
- 1425 42. Boyd, A. *et al.* Cohort profile: The ‘Children of the 90s’-The index offspring of the avon  
1426 longitudinal study of parents and children. *Int. J. Epidemiol.* **42**, 111–127 (2013).
- 1427 43. Fraser, A. *et al.* Cohort profile: The avon longitudinal study of parents and children:  
1428 ALSPAC mothers cohort. *Int. J. Epidemiol.* **42**, 97–110 (2013).
- 1429 44. Cereb, N., Kim, H. R., Ryu, J. & Yang, S. Y. Advances in DNA sequencing technologies

- 1430 for high resolution HLA typing. *Hum Immunol* **76**, 923–927 (2015).
- 1431 45. Mack, S. J. *et al.* Common and well-documented HLA alleles: 2012 update to the CWD  
1432 catalogue. *Tissue Antigens* **81**, 194–203 (2013).
- 1433 46. Gourraud, P. A. *et al.* HLA diversity in the 1000 genomes dataset. *PLoS One* **9**, e97282  
1434 (2014).
- 1435 47. Smits, G. P., van Gageldonk, P. G., Schouls, L. M., van der Klis, F. R. & Berbers, G. A.  
1436 Development of a bead-based multiplex immunoassay for simultaneous quantitative  
1437 detection of IgG serum antibodies against measles, mumps, rubella, and varicella-zoster  
1438 virus. *Clin Vaccine Immunol* **19**, 396–400 (2012).
- 1439 48. van Gageldonk, P. G., van Schaijk, F. G., van der Klis, F. R. & Berbers, G. A.  
1440 Development and validation of a multiplex immunoassay for the simultaneous  
1441 determination of serum antibodies to Bordetella pertussis, diphtheria and tetanus. *J*  
1442 *Immunol Methods* **335**, 79–89 (2008).
- 1443 49. de Voer, R. M., Schepp, R. M., Versteegh, F. G., van der Klis, F. R. & Berbers, G. A.  
1444 Simultaneous detection of Haemophilus influenzae type b polysaccharide-specific  
1445 antibodies and Neisseria meningitidis serogroup A, C, Y, and W-135 polysaccharide-  
1446 specific antibodies in a fluorescent-bead-based multiplex immunoassay. *Clin Vaccine*  
1447 *Immunol* **16**, 433–436 (2009).
- 1448 50. Swart, E. M. *et al.* Long-Term Protection against Diphtheria in the Netherlands after 50  
1449 Years of Vaccination: Results from a Seroepidemiological Study. *PLoS One* **11**, e0148605  
1450 (2016).
- 1451 51. Brinkman, I. D. *et al.* Early measles vaccination during an outbreak in The Netherlands:  
1452 reduced short and long-term antibody responses in children vaccinated before 12 months of  
1453 age. *J Infect Dis* pii: 5441452 (2019). doi:10.1093/infdis/jiz159
- 1454 52. Bancroft, T. *et al.* Th1 versus Th2 T cell polarization by whole-cell and acellular childhood  
1455 pertussis vaccines persists upon re-immunization in adolescence and adulthood. *Cell*  
1456 *Immunol* **304–305**, 35–43 (2016).
- 1457 53. Lindestam Arlehamn, C. S. *et al.* Memory T cells in latent Mycobacterium tuberculosis  
1458 infection are directed against three antigenic islands and largely contained in a  
1459 CXCR3+CCR6+ Th1 subset. *PLoS Pathog* **9**, e1003130 (2013).
- 1460 54. Weiskopf, D. *et al.* Comprehensive analysis of dengue virus-specific responses supports an  
1461 HLA-linked protective role for CD8+ T cells. *Proc Natl Acad Sci U S A* **110**, E2046-53  
1462 (2013).
- 1463 55. Frazier, A. *et al.* Allergy-associated T cell epitope repertoires are surprisingly diverse and  
1464 include non-IgE reactive antigens. *World Allergy Organ J* **7**, 26 (2014).
- 1465 56. Schmiedel, B. J. *et al.* Impact of Genetic Polymorphisms on Human Immune Cell Gene  
1466 Expression Resource Impact of Genetic Polymorphisms on Human Immune Cell Gene  
1467 Expression. *Cell* **175**, (2018).
- 1468 57. Purcell, S., Cherny, S. S. & Sham, P. C. Genetic Power Calculator: design of linkage and  
1469 association genetic mapping studies of complex traits. *Bioinformatics* **19**, 149–150 (2003).
- 1470 58. Patterson, N., Price, A. L. & Reich, D. Population structure and eigenanalysis. *PLoS Genet*  
1471 **2**, e190 (2006).
- 1472 59. Gurdasani, D. *et al.* The African Genome Variation Project shapes medical genetics in  
1473 Africa. *Nature* (2015). doi:10.1038/nature13997
- 1474 60. Consortium, G. P. *et al.* An integrated map of genetic variation from 1,092 human  
1475 genomes. *Nature* **491**, 56–65 (2012).
- 1476 61. Delaneau, O., Marchini, J. & Zagury, J. F. A linear complexity phasing method for  
1477 thousands of genomes. *Nat Methods* **9**, 179–181 (2011).
- 1478 62. Howie, B., Fuchsberger, C., Stephens, M., Marchini, J. & Abecasis, G. R. Fast and  
1479 accurate genotype imputation in genome-wide association studies through pre-phasing. *Nat*

- 1480 *Genet* **44**, 955–959 (2012).
- 1481 63. Keenan, K., McGinnity, P., Cross, T. F., Crozier, W. W. & Prodohl, P. A. diveRcity: An R  
1482 package for the estimation and exploration of population genetics parameters and their  
1483 associated errors. *Methods Ecol. Evol.* **4**, 782–788 (2013).
- 1484 64. Jost, L. G(ST) and its relatives do not measure differentiation. *Mol Ecol* **17**, 4015–4026  
1485 (2008).
- 1486 65. Henn, B. M. *et al.* Hunter-gatherer genomic diversity suggests a southern African origin for  
1487 modern humans. *Proc Natl Acad Sci U S A* **108**, 5154–5162 (2011).
- 1488 66. Pirinen, M., Donnelly, P. & Spencer, C. C. Including known covariates can reduce power  
1489 to detect genetic effects in case-control studies. *Nat Genet* **44**, 848–851 (2012).
- 1490 67. Yang, J., Zaitlen, N. A., Goddard, M. E., Visscher, P. M. & Price, A. L. Advantages and  
1491 pitfalls in the application of mixed-model association methods. *Nature Genetics* (2014).  
1492 doi:10.1038/ng.2876
- 1493 68. Zhou, X. & Stephens, M. Efficient multivariate linear mixed model algorithms for genome-  
1494 wide association studies. *Nat Methods* **11**, 407–409 (2014).
- 1495 69. Han, B. & Eskin, E. Random-effects model aimed at discovering associations in meta-  
1496 analysis of genome-wide association studies. *Am J Hum Genet* **88**, 586–598 (2011).
- 1497 70. Jia, X. *et al.* Imputing amino acid polymorphisms in human leukocyte antigens. *PLoS One*  
1498 **8**, e64683 (2013).
- 1499 71. Zheng, X. *et al.* HIBAG--HLA genotype imputation with attribute bagging.  
1500 *Pharmacogenomics J* **14**, 192–200 (2014).
- 1501 72. International Multiple Sclerosis Genetics, C. *et al.* Genetic risk and a primary role for cell-  
1502 mediated immune mechanisms in multiple sclerosis. *Nature* **476**, 214–219 (2011).
- 1503 73. Morris, A. P. Transethnic meta-analysis of genomewide association studies. *Genet*  
1504 *Epidemiol* **35**, 809–822 (2011).
- 1505 74. Dobin, A. *et al.* STAR: ultrafast universal RNA-seq aligner. *Bioinformatics* **29**, 15–21  
1506 (2013).
- 1507 75. Love, M. I., Huber, W. & Anders, S. Moderated estimation of fold change and dispersion  
1508 for RNA-seq data with DESeq2. *Genome Biol* **15**, 550 (2014).
- 1509 76. Shabalin, A. A. Matrix eQTL: ultra fast eQTL analysis via large matrix operations.  
1510 *Bioinformatics* **28**, 1353–1358 (2012).
- 1511 77. Vince, N. *et al.* HLA-C Level Is Regulated by a Polymorphic Oct1 Binding Site in the  
1512 HLA-C Promoter Region. *Am J Hum Genet* **99**, 1353–1358 (2016).
- 1513 78. Vita, R. *et al.* The immune epitope database (IEDB) 3.0. *Nucleic Acids Res* **43**, D405-12  
1514 (2015).
- 1515 79. Wang, P. *et al.* Peptide binding predictions for HLA DR, DP and DQ molecules. *BMC*  
1516 *Bioinformatics* **11**, 568 (2010).
- 1517
- 1518





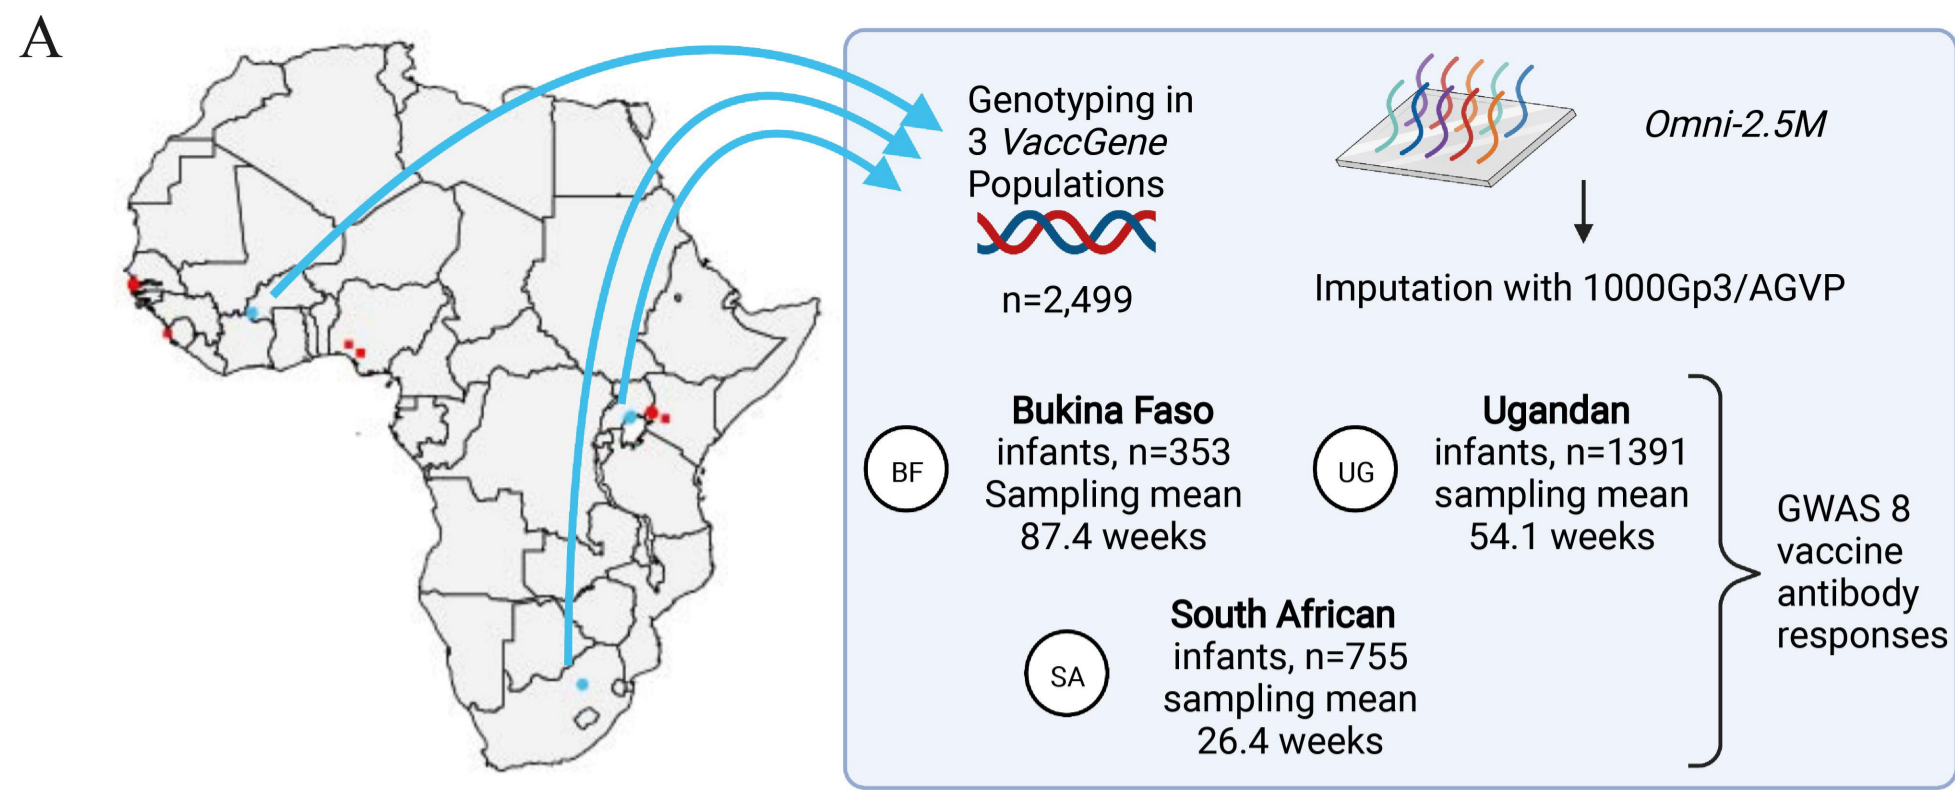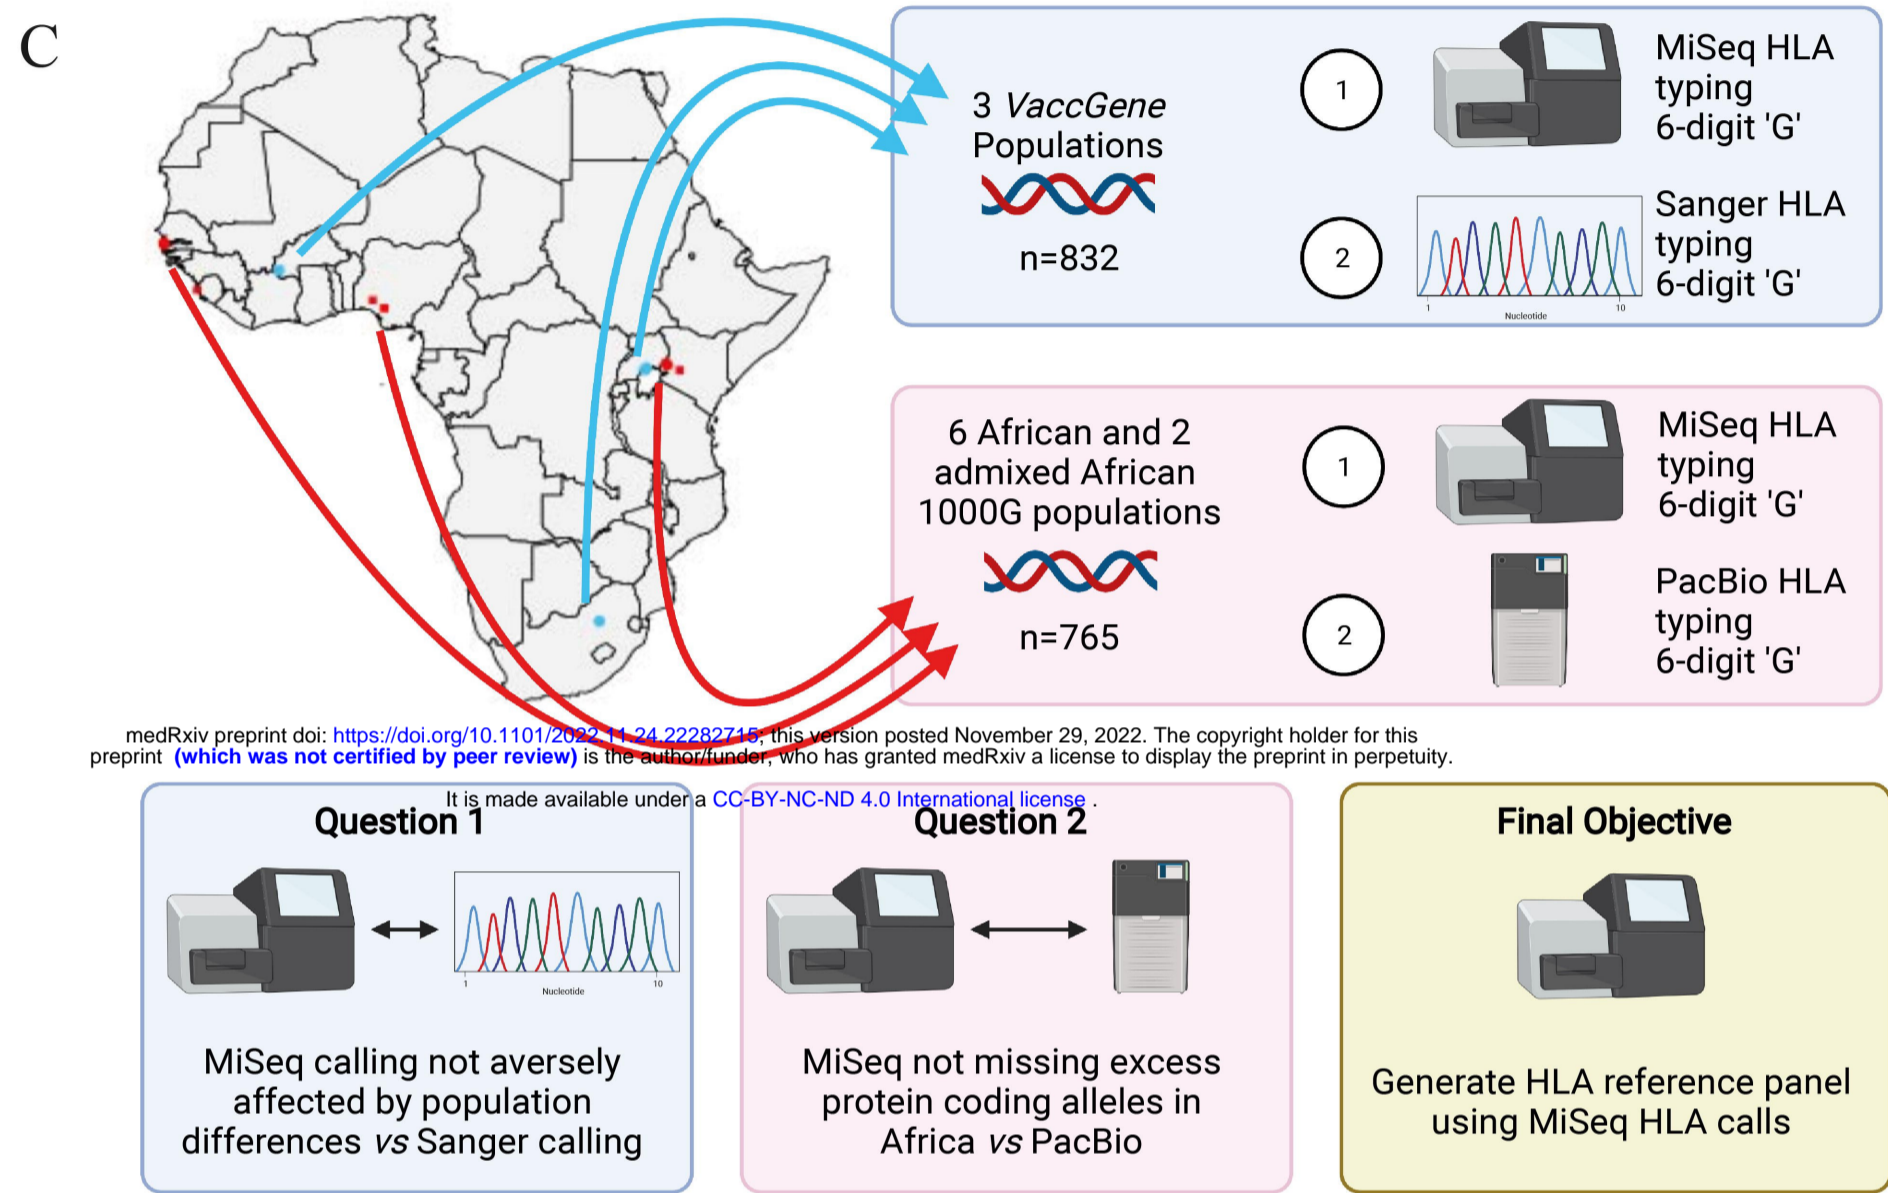

medRxiv preprint doi: <https://doi.org/10.1101/2022.11.29.22282745>; this version posted November 29, 2022. The copyright holder for this preprint (which was not certified by peer review) is the author/funder, who has granted medRxiv a license to display the preprint in perpetuity. It is made available under a [CC-BY-NC-ND 4.0 International license](https://creativecommons.org/licenses/by-nc-nd/4.0/).

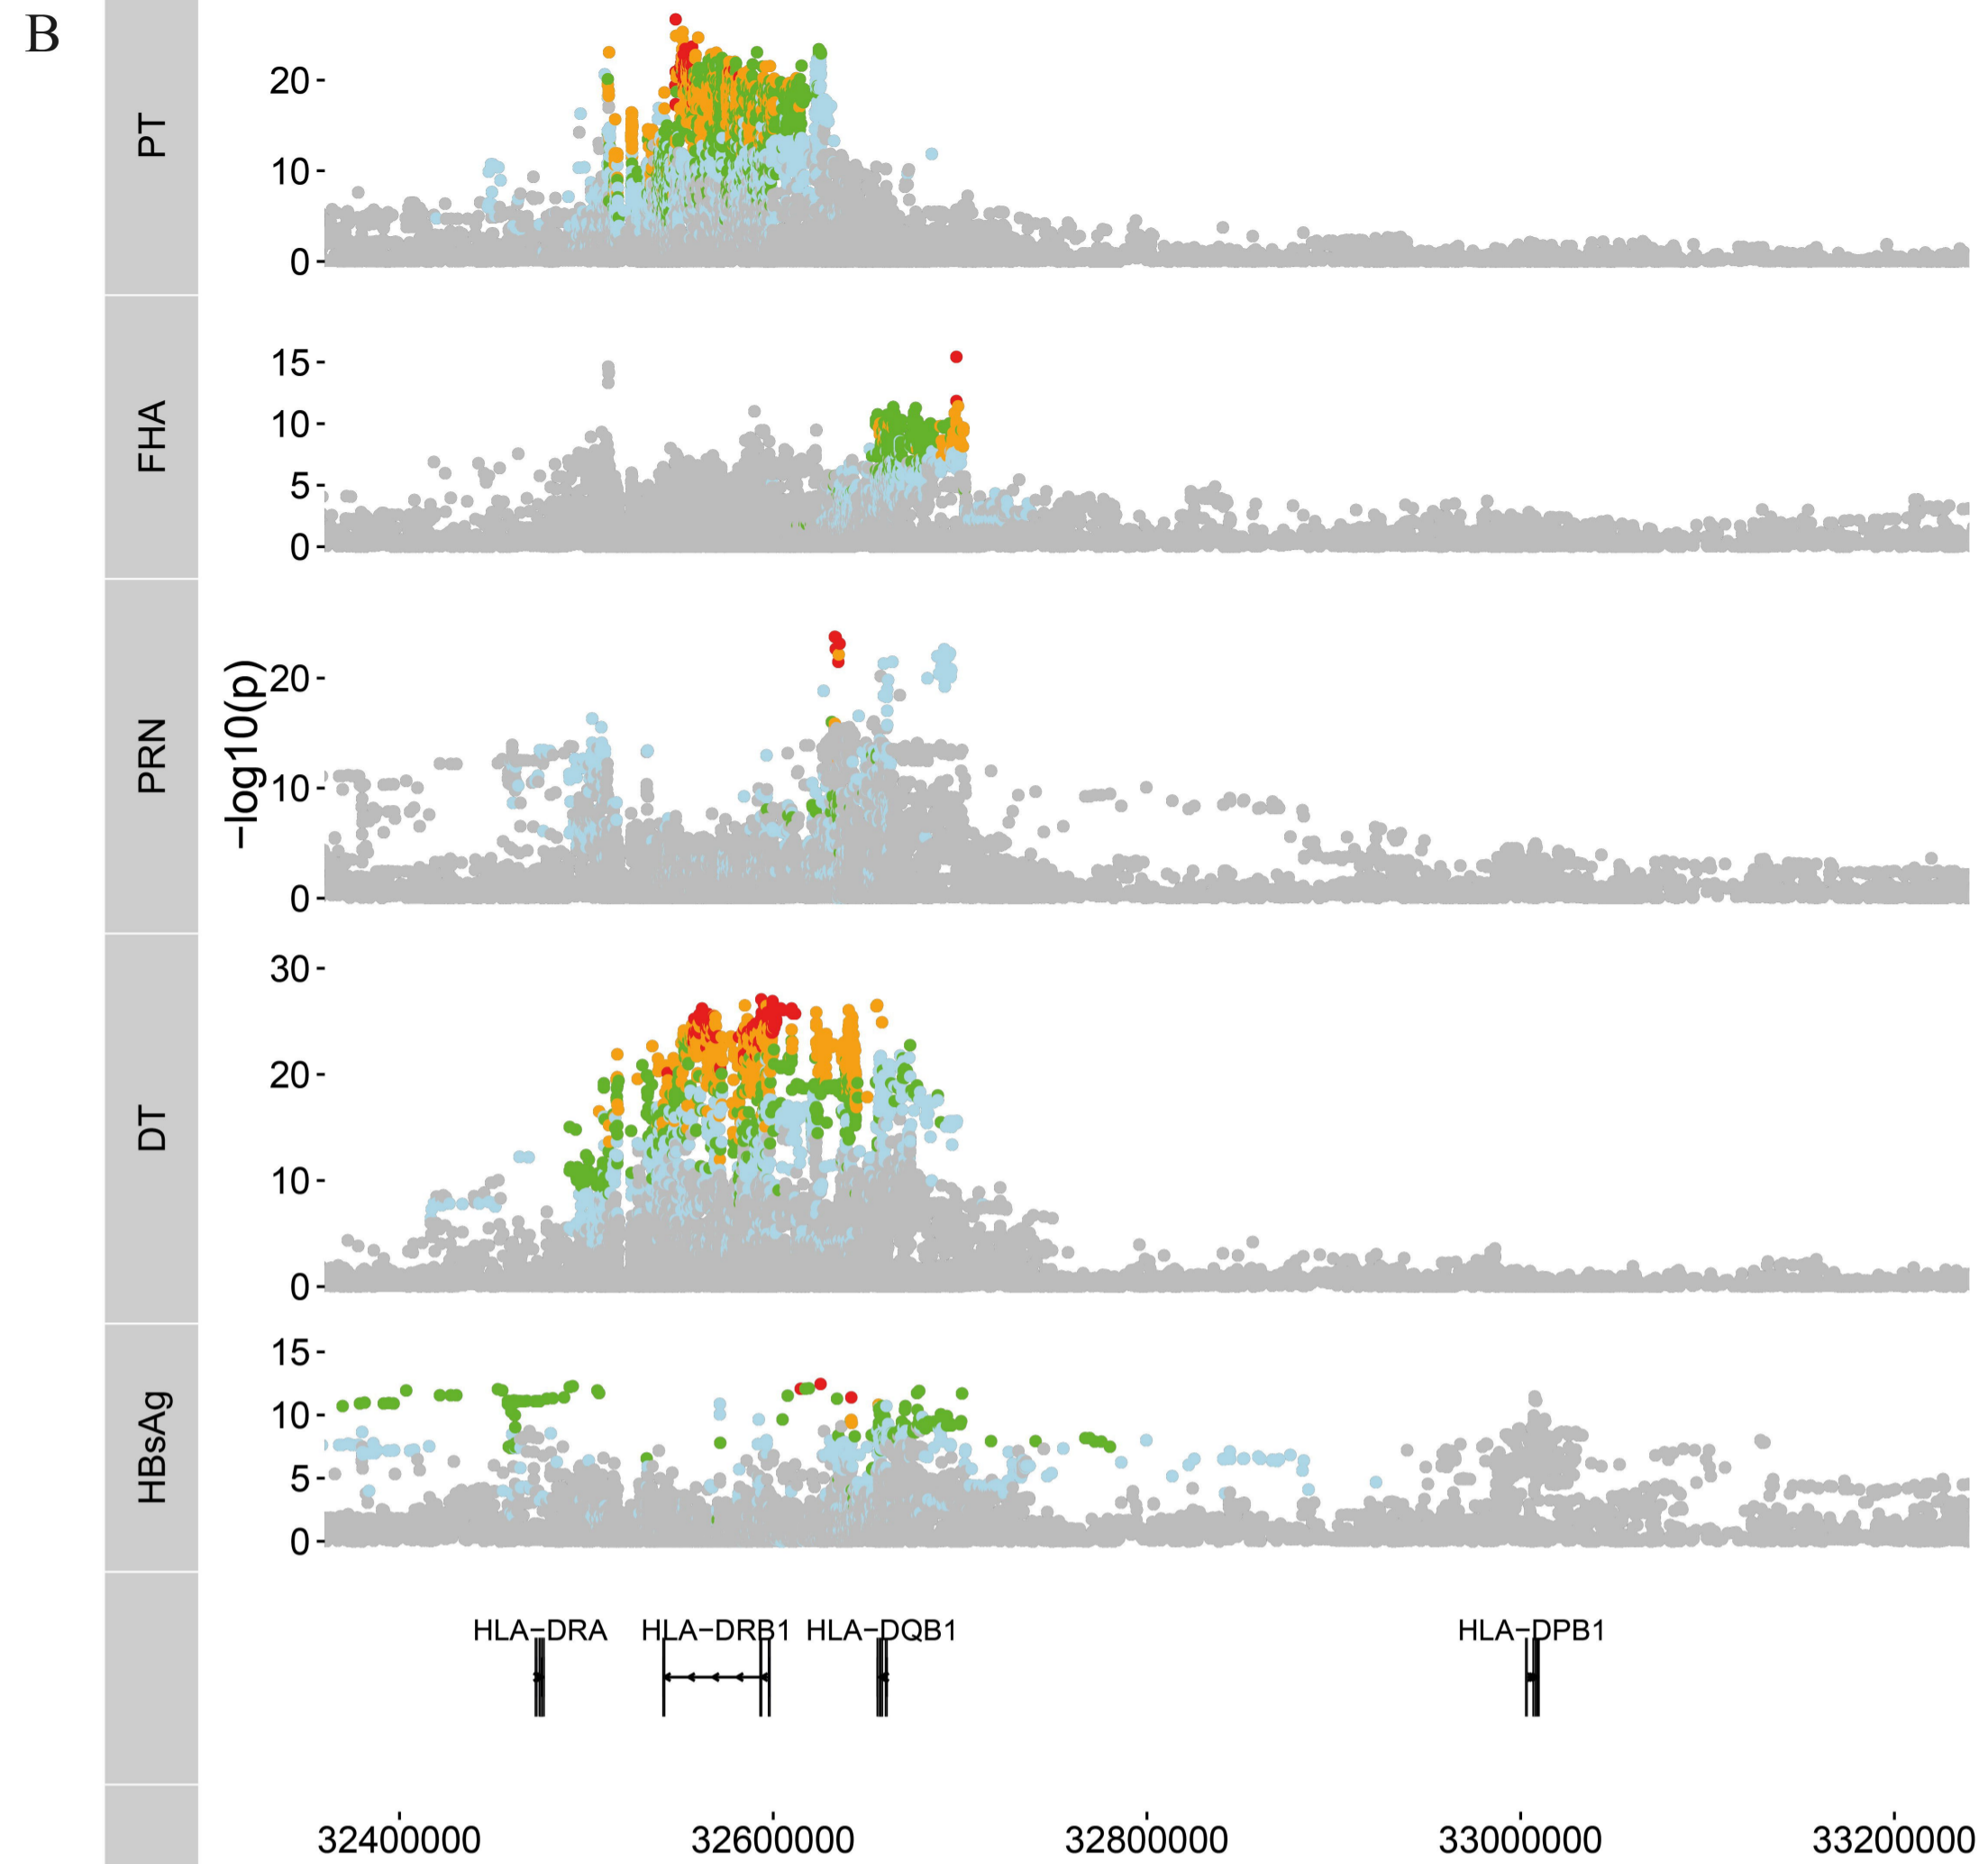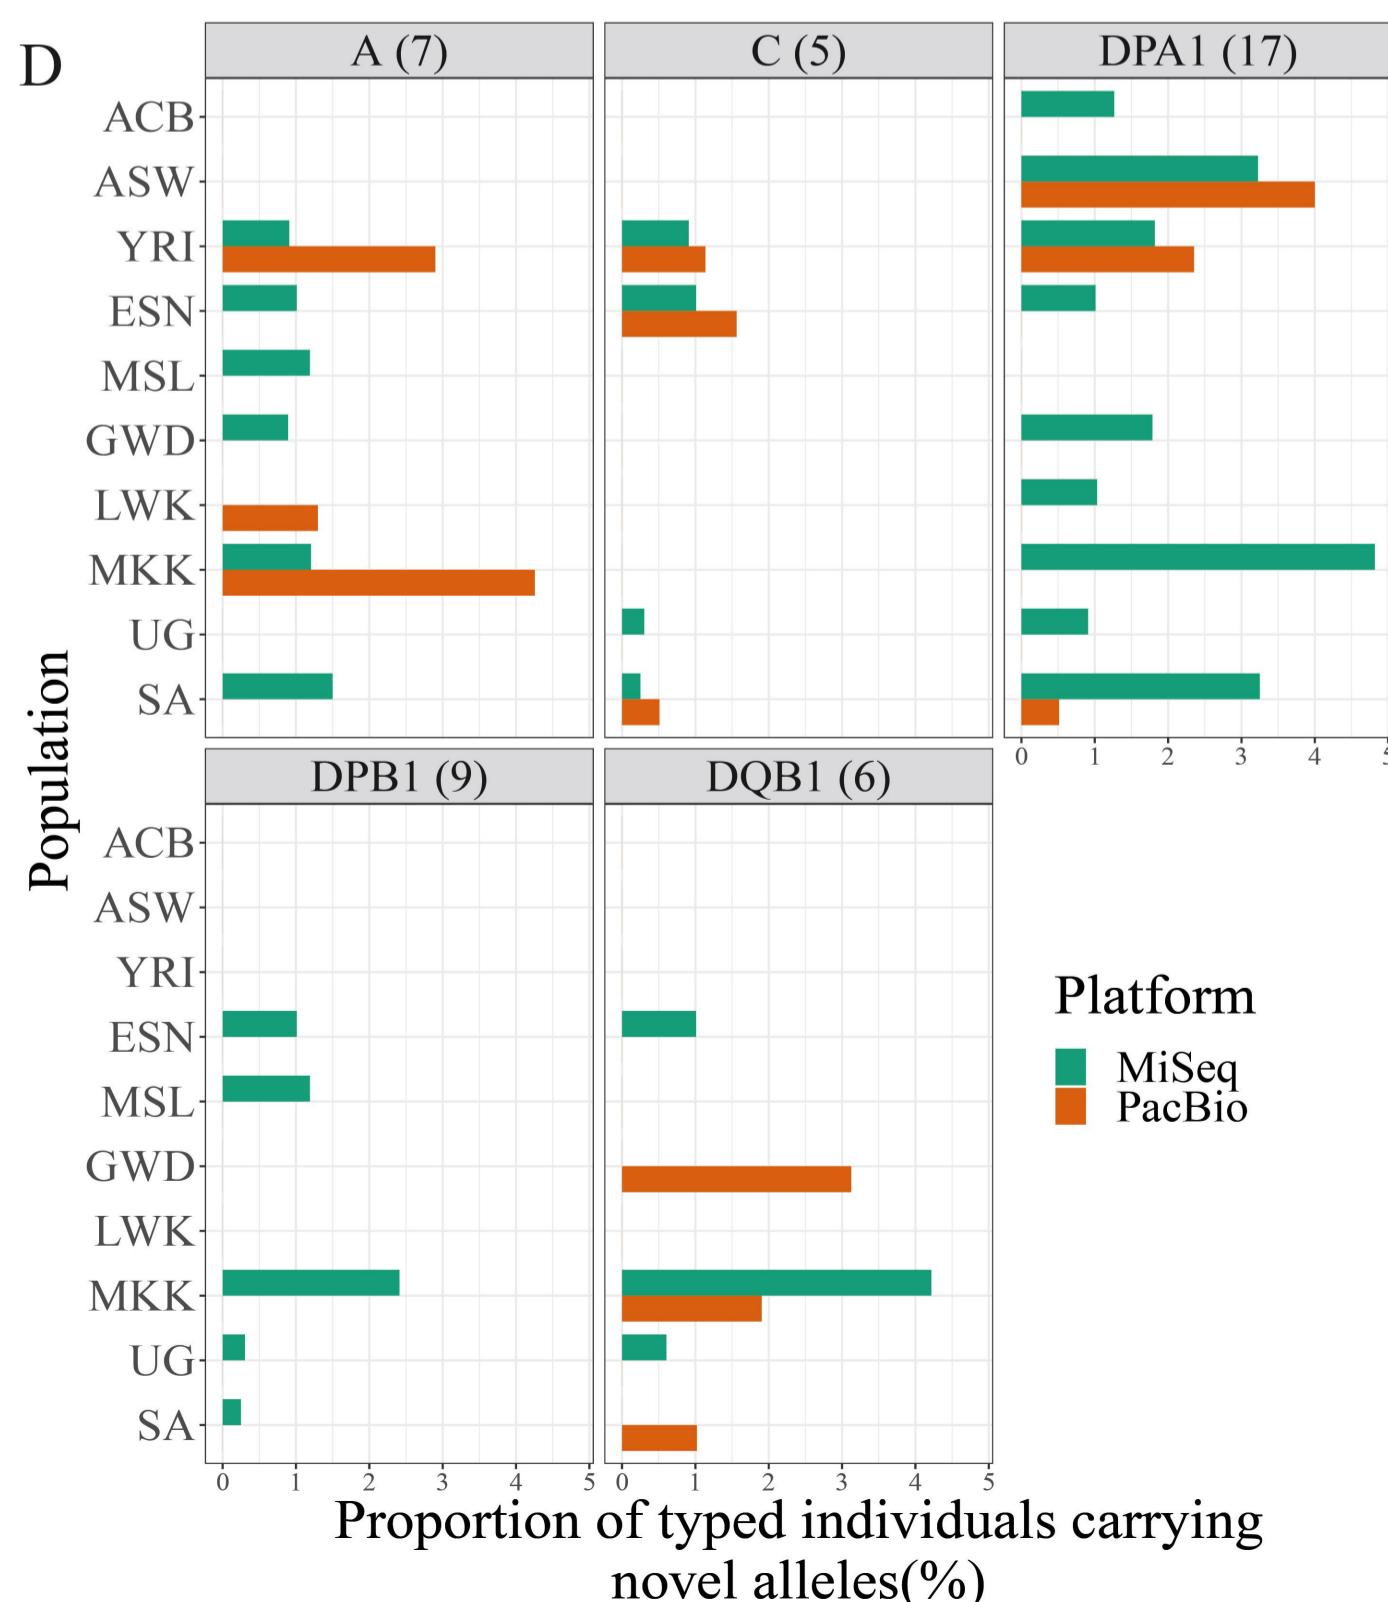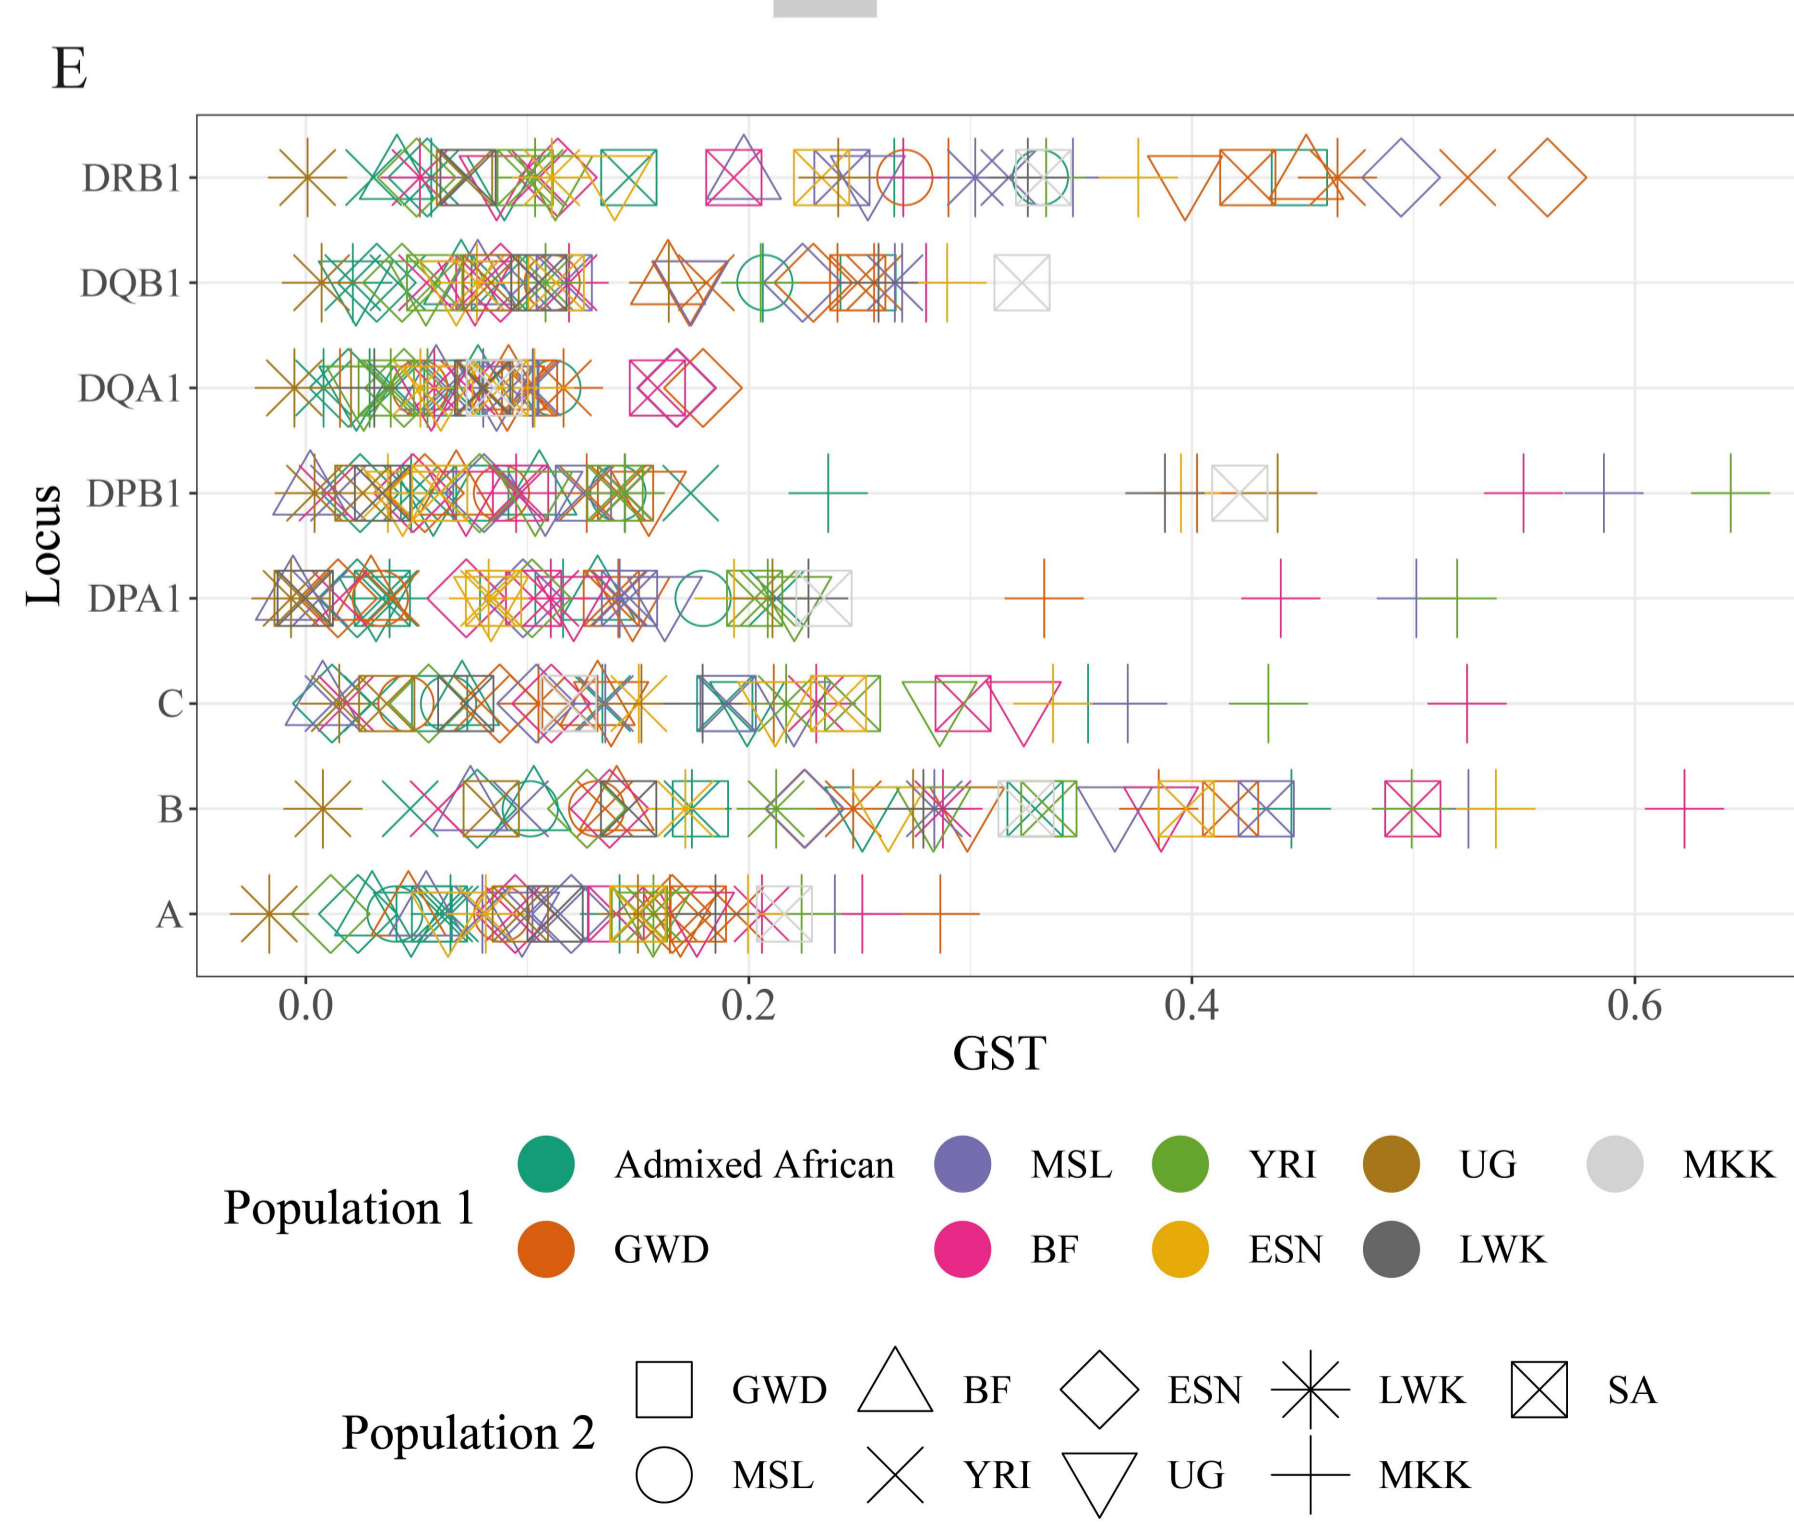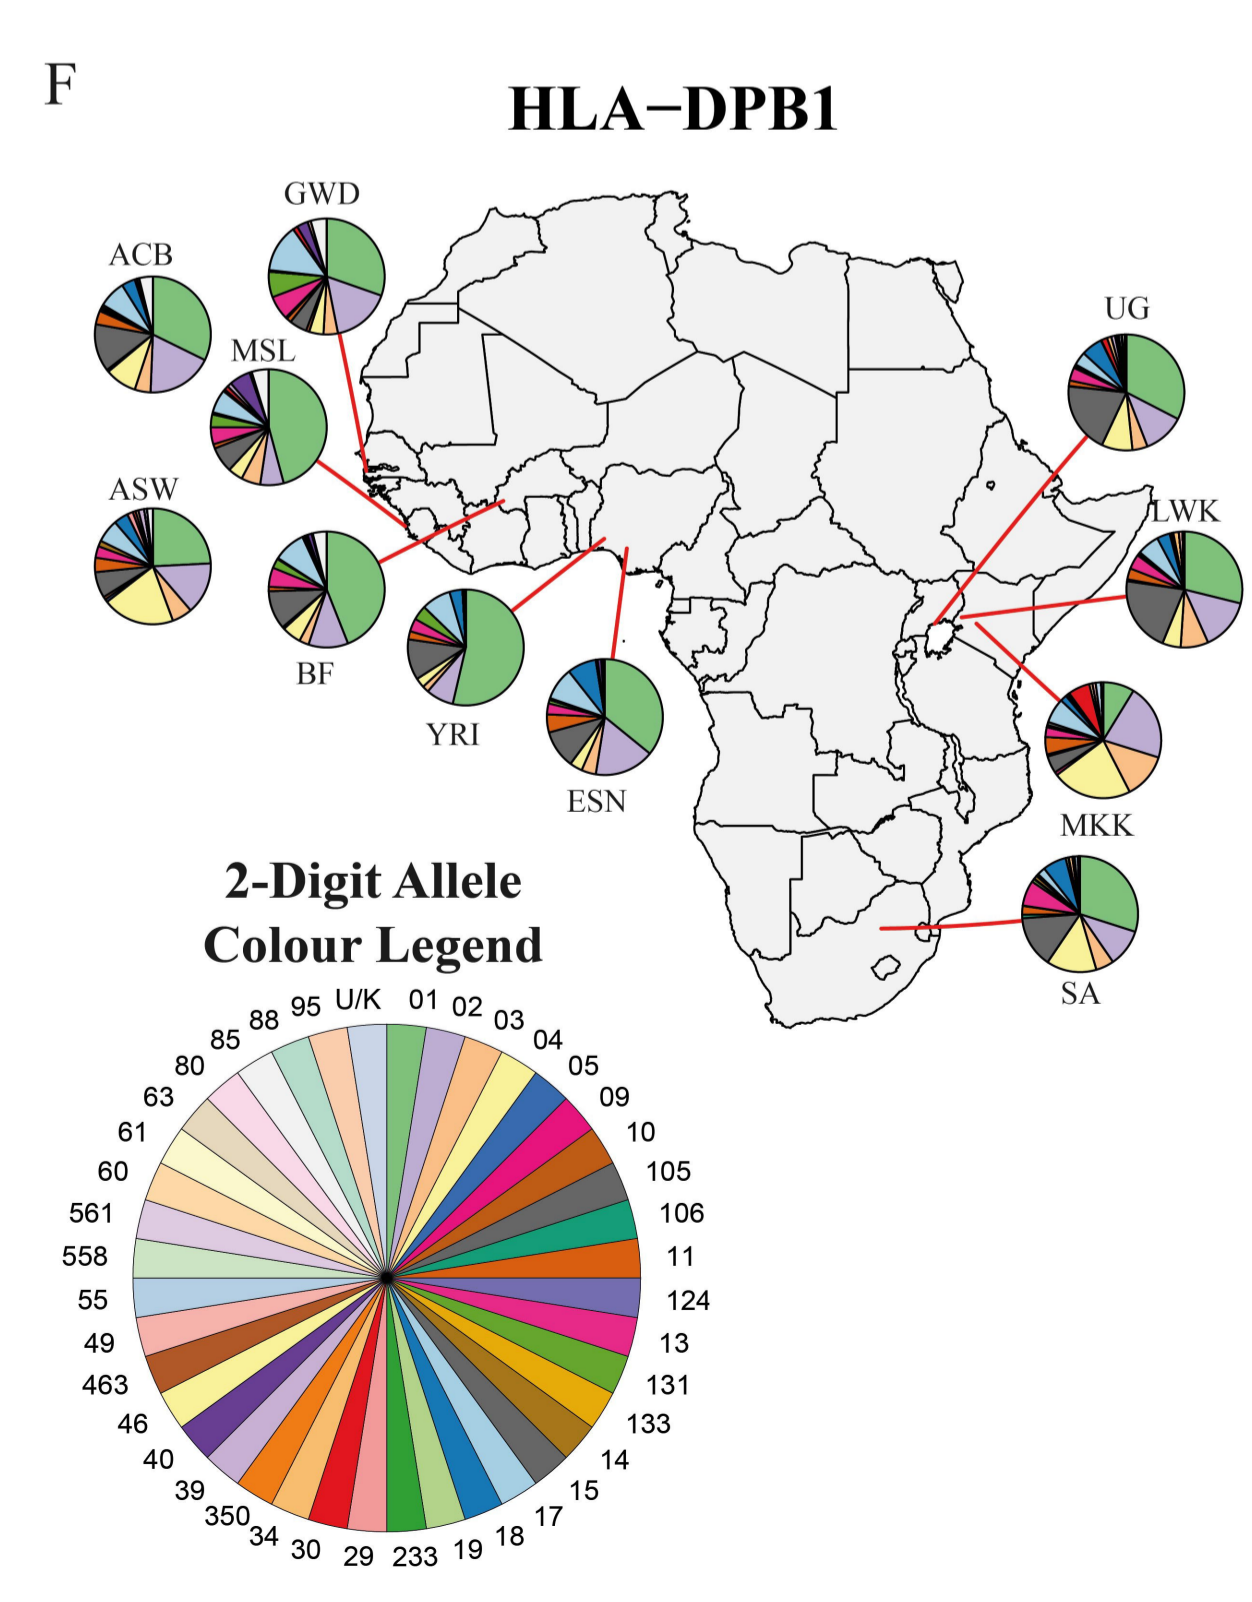

A

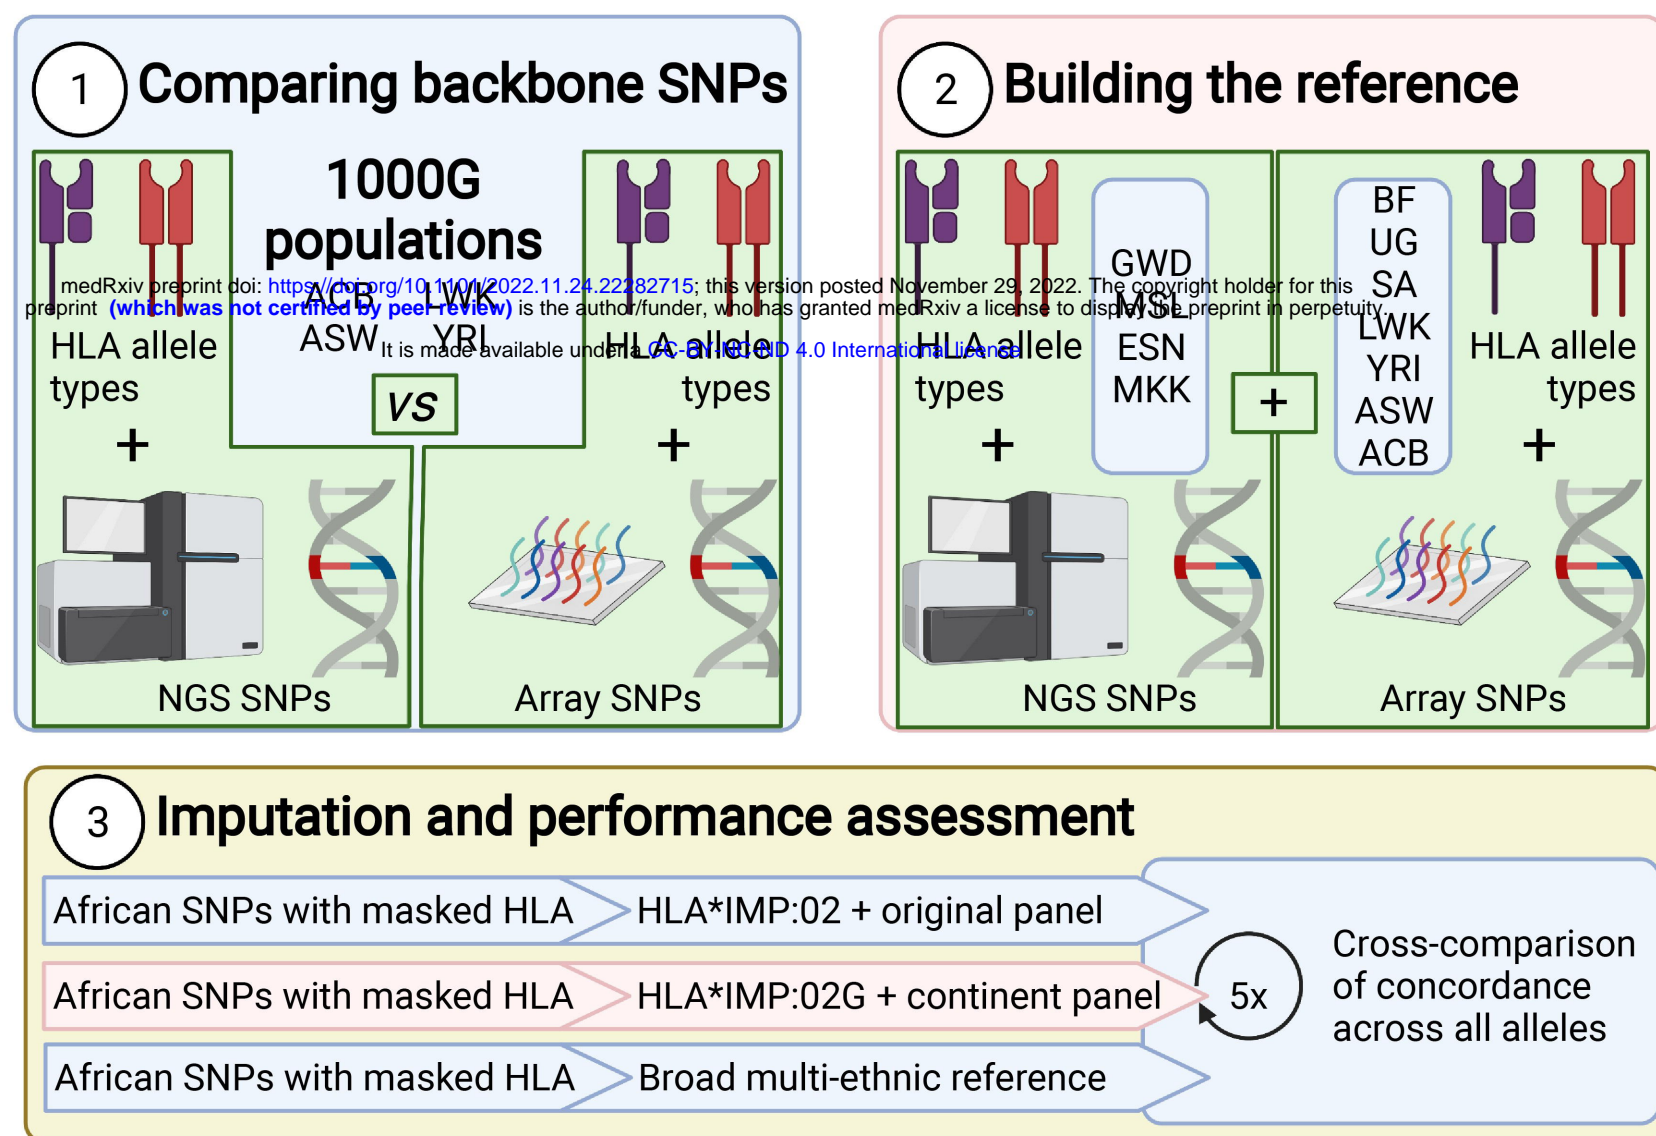

B

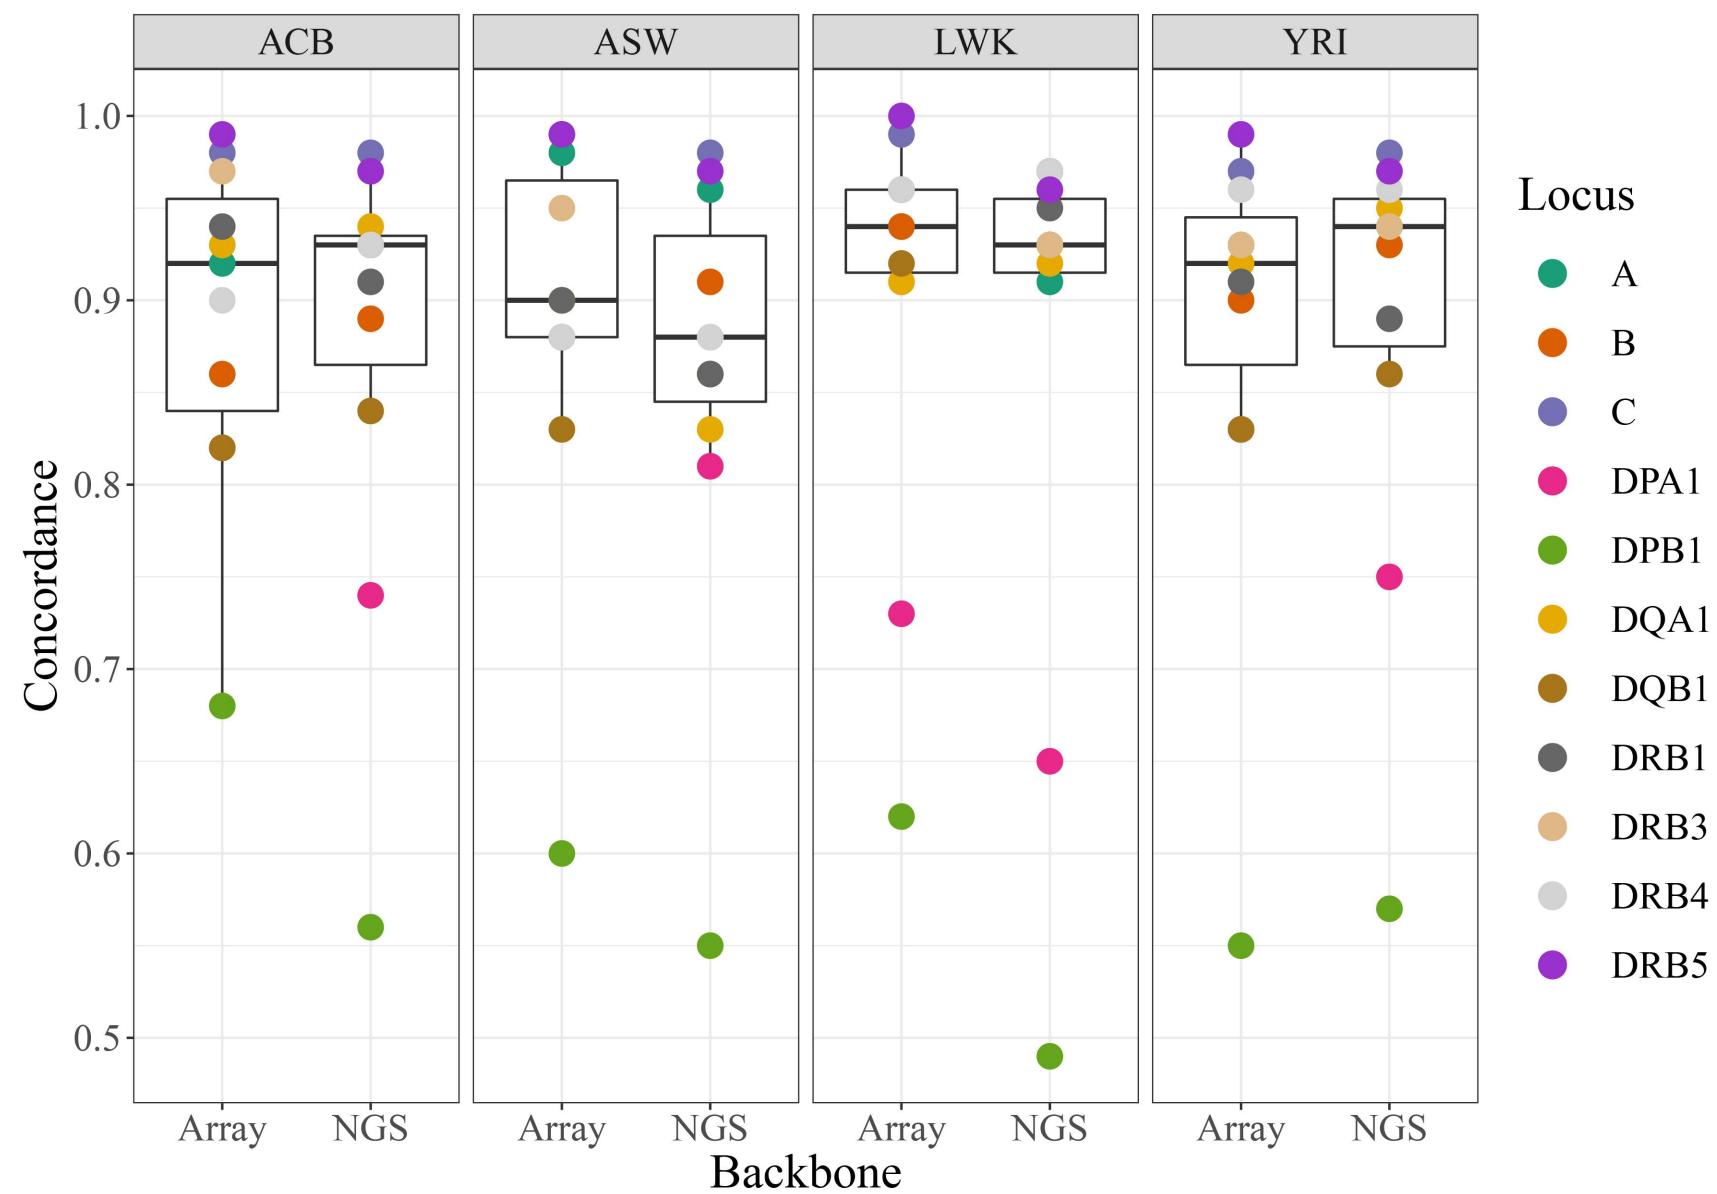

C

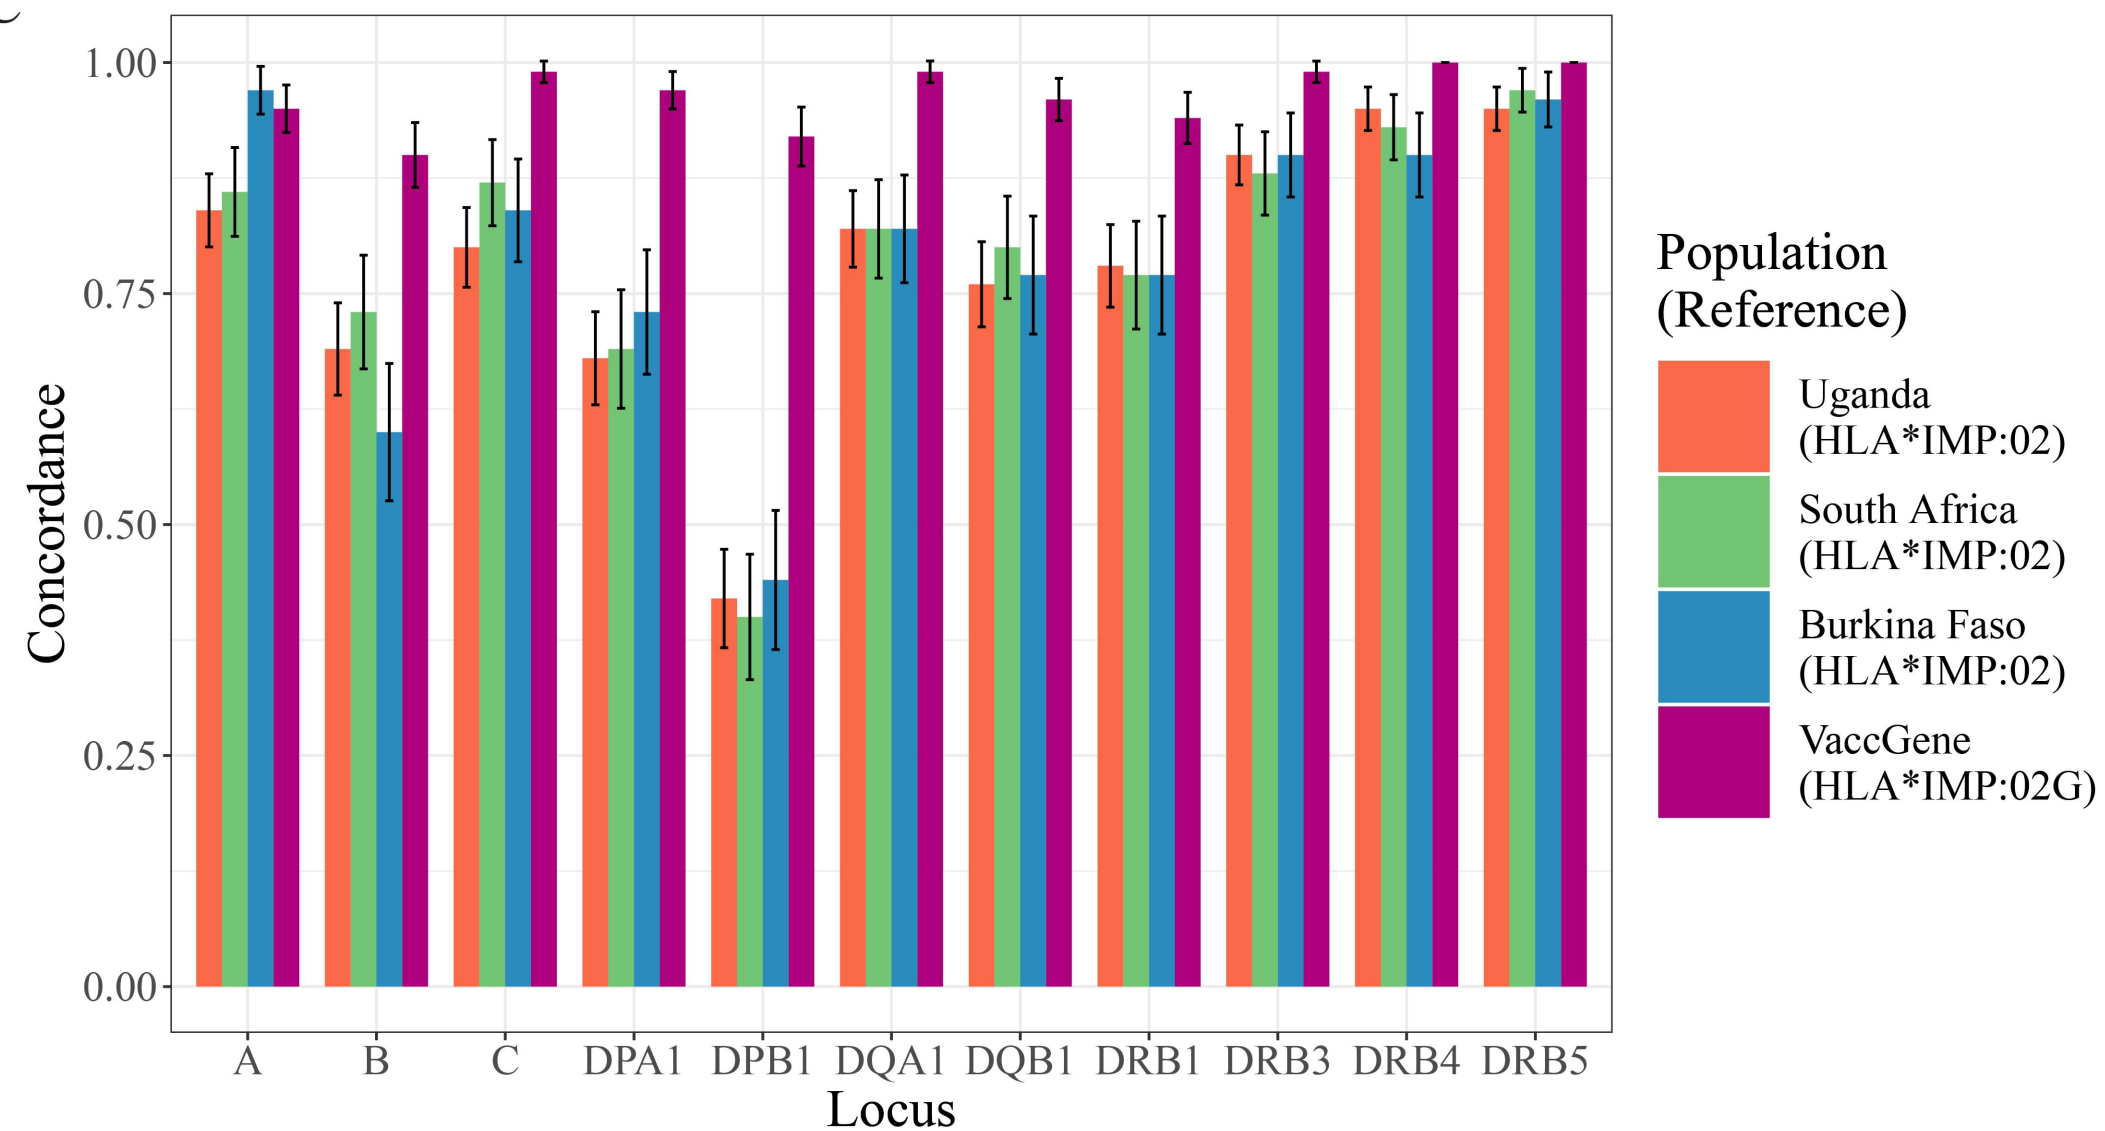

D

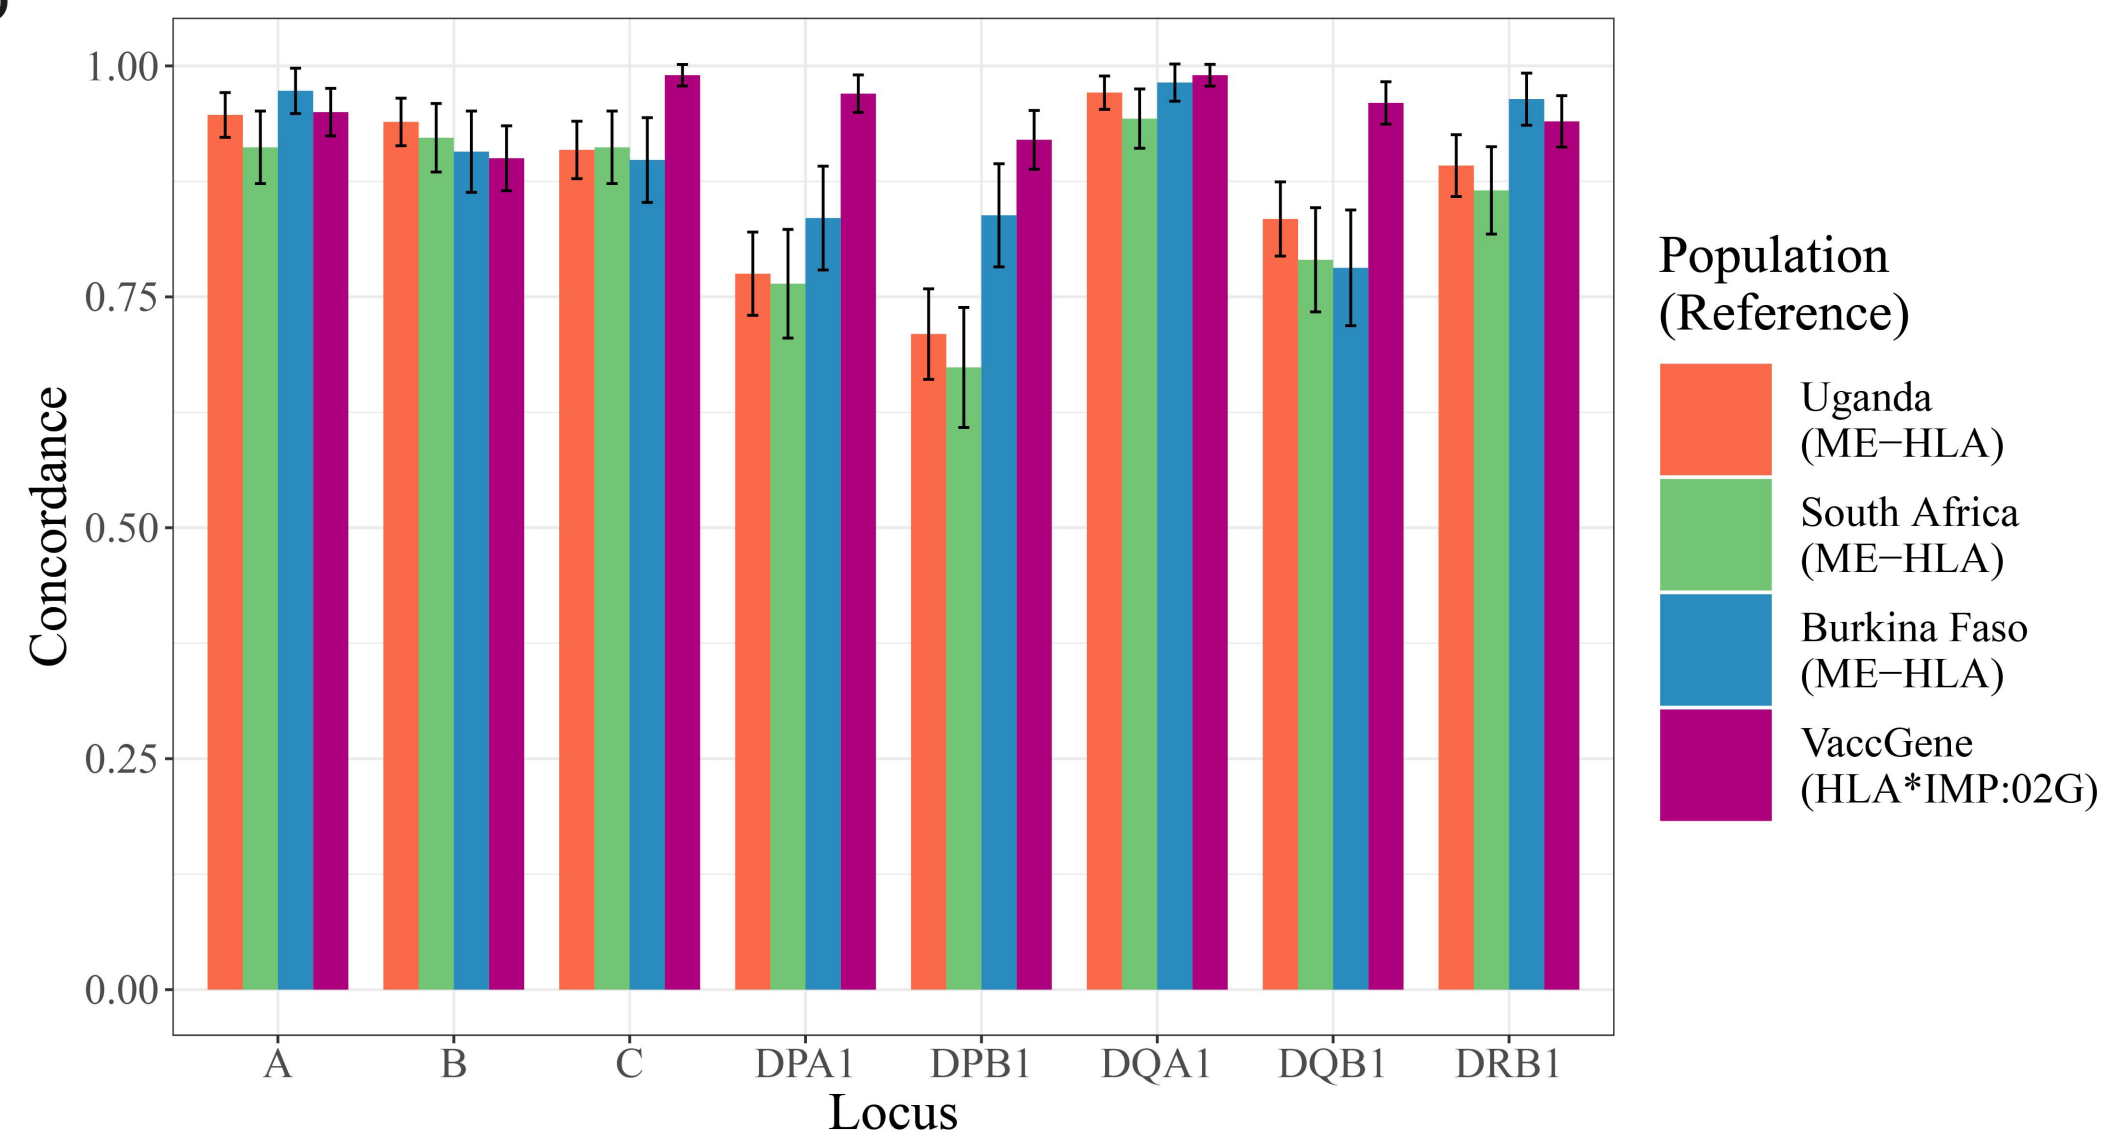

PRN

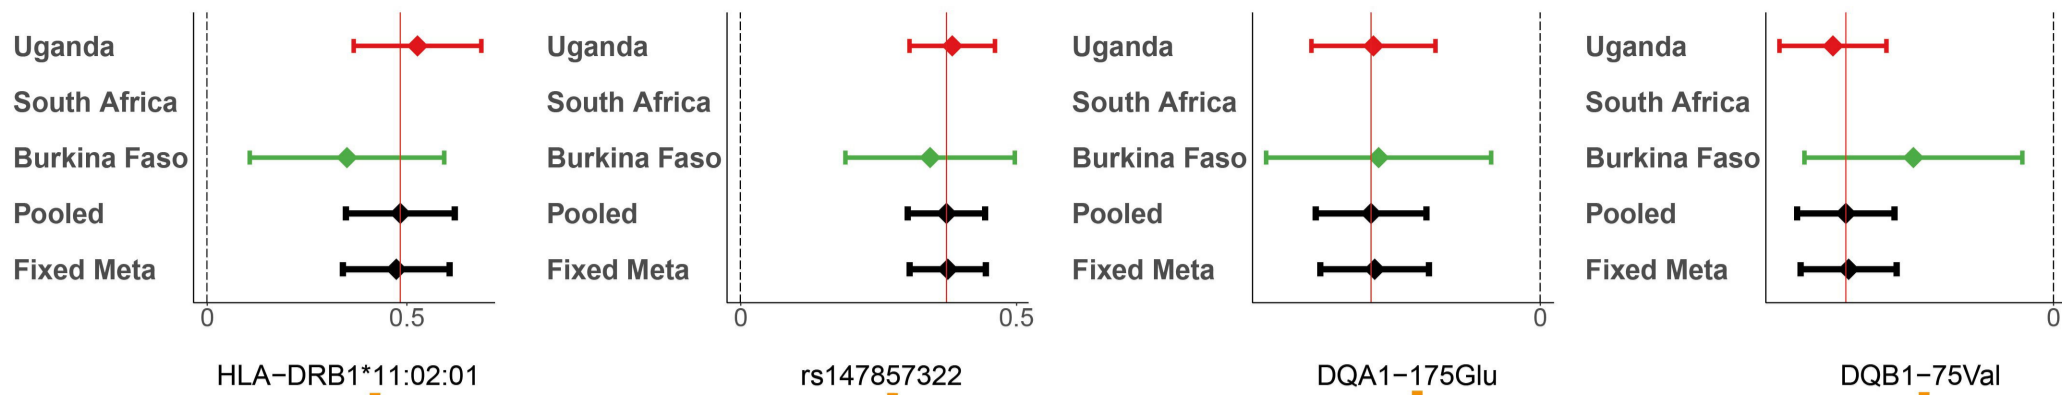

FHA

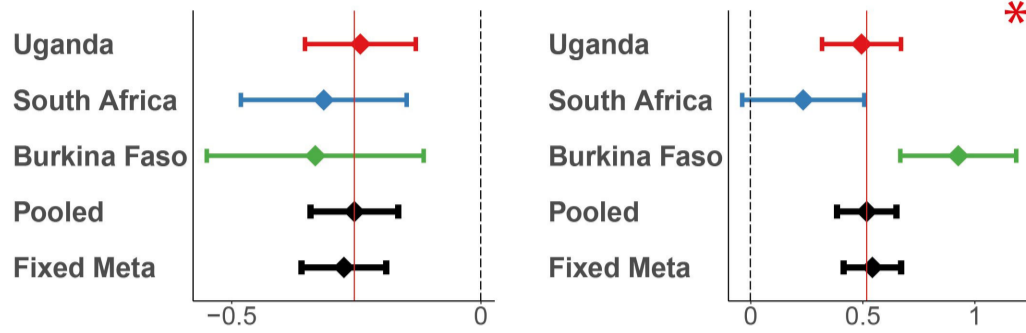

medRxiv preprint doi: <https://doi.org/10.1101/2022.11.24.22282715>; this version posted November 29, 2022. The copyright holder for this preprint (which was not certified by peer review) is the author/funder, who has granted medRxiv a license to display the preprint in perpetuity. It is made available under a [CC-BY-NC-ND 4.0 International license](https://creativecommons.org/licenses/by-nc-nd/4.0/).

DT

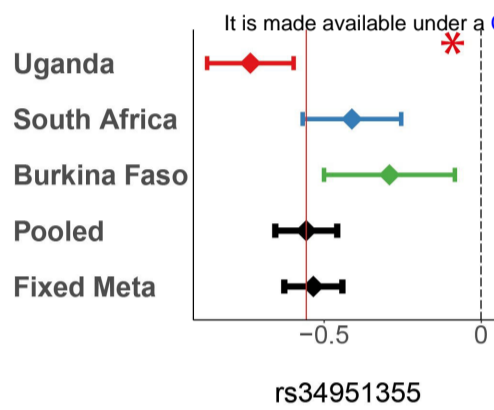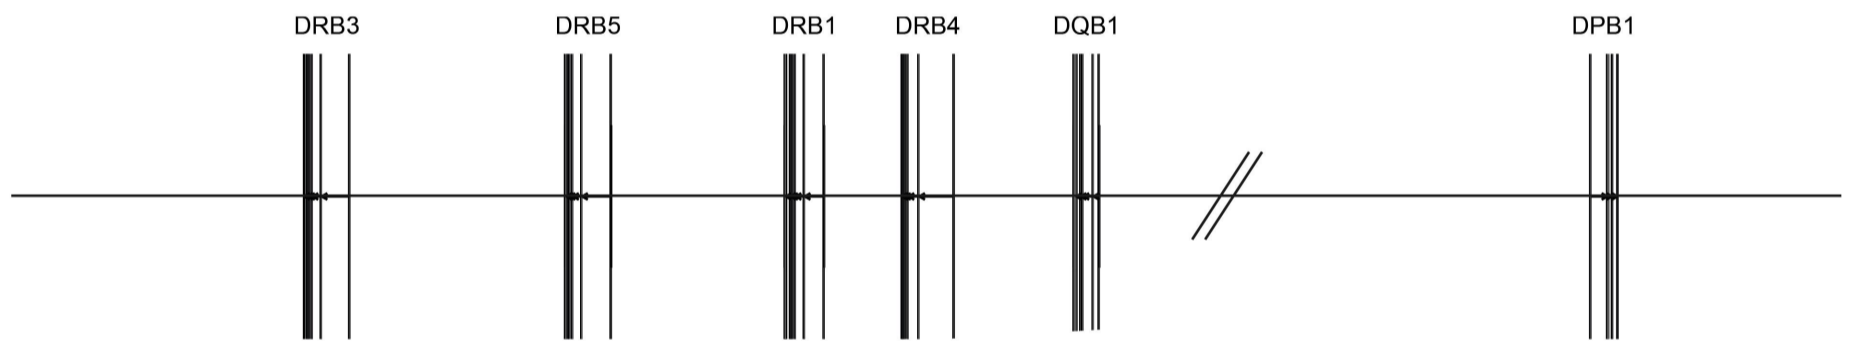

PT

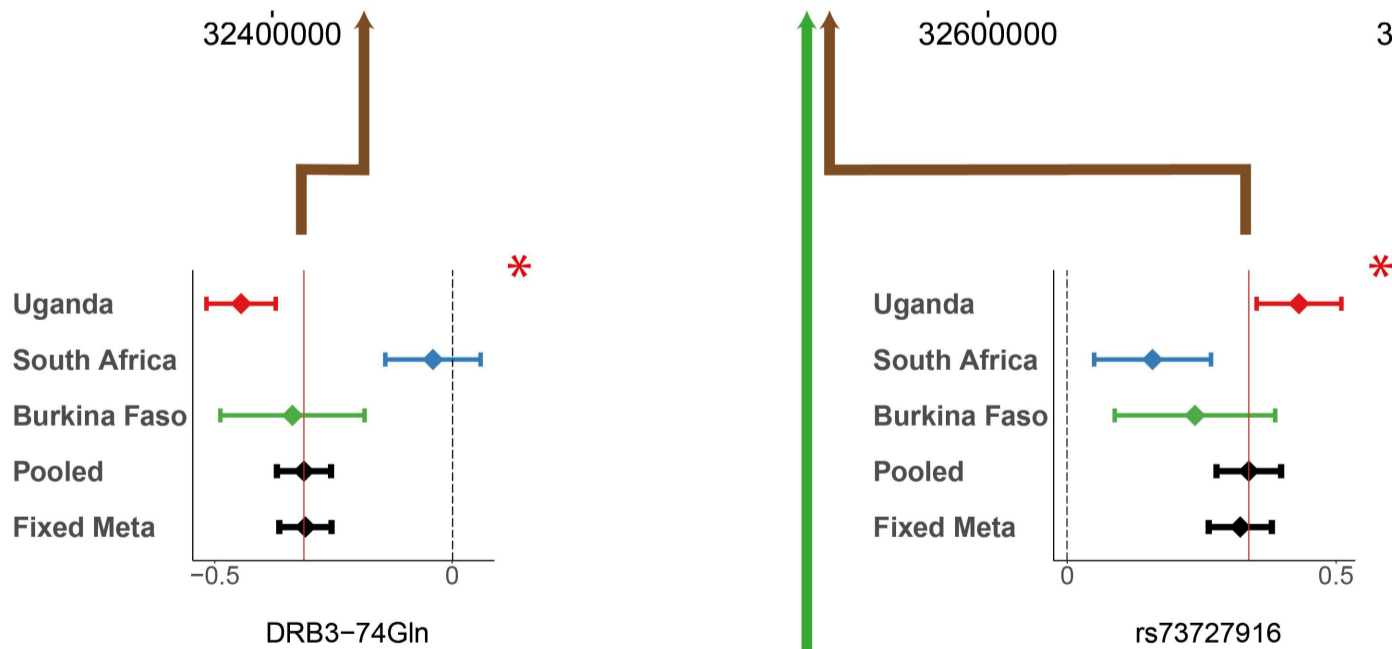

HBsAg

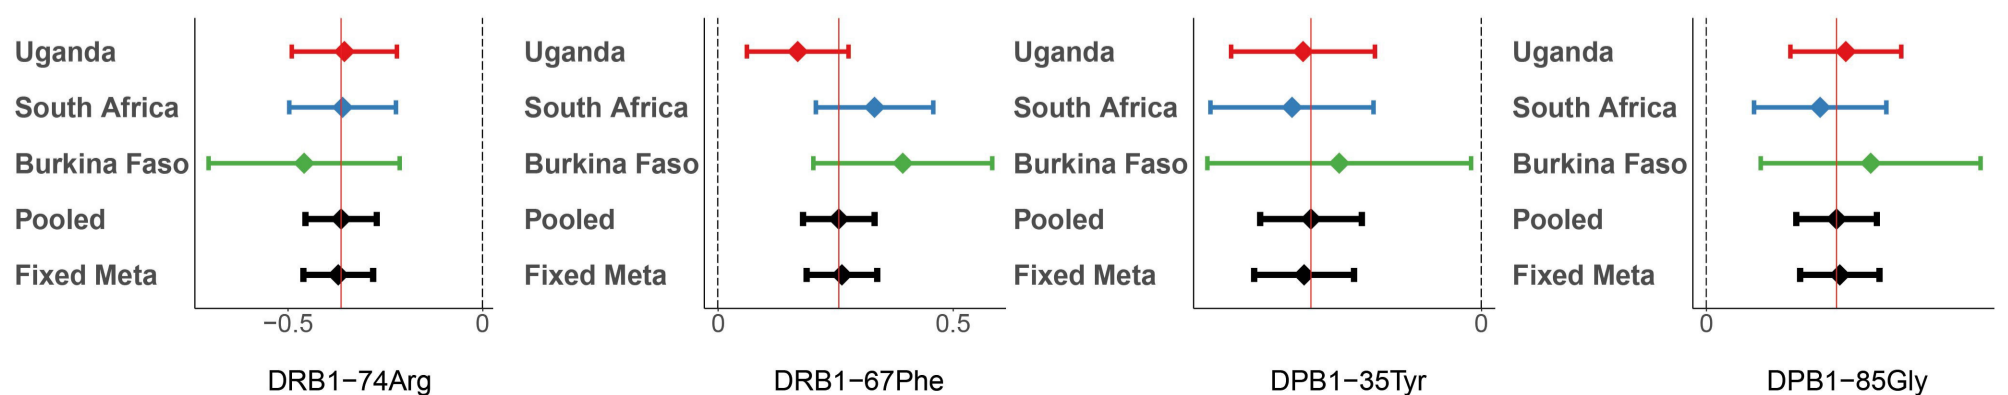

A

medRxiv preprint doi: <https://doi.org/10.1101/2022.11.24.22282715>; this version posted November 29, 2022. The copyright holder for this preprint (which was not certified by peer review) is the author/funder, who has granted medRxiv a license to display the preprint in perpetuity. It is made available under a CC-BY-NC-ND 4.0 International license.

Vaccine antibody response

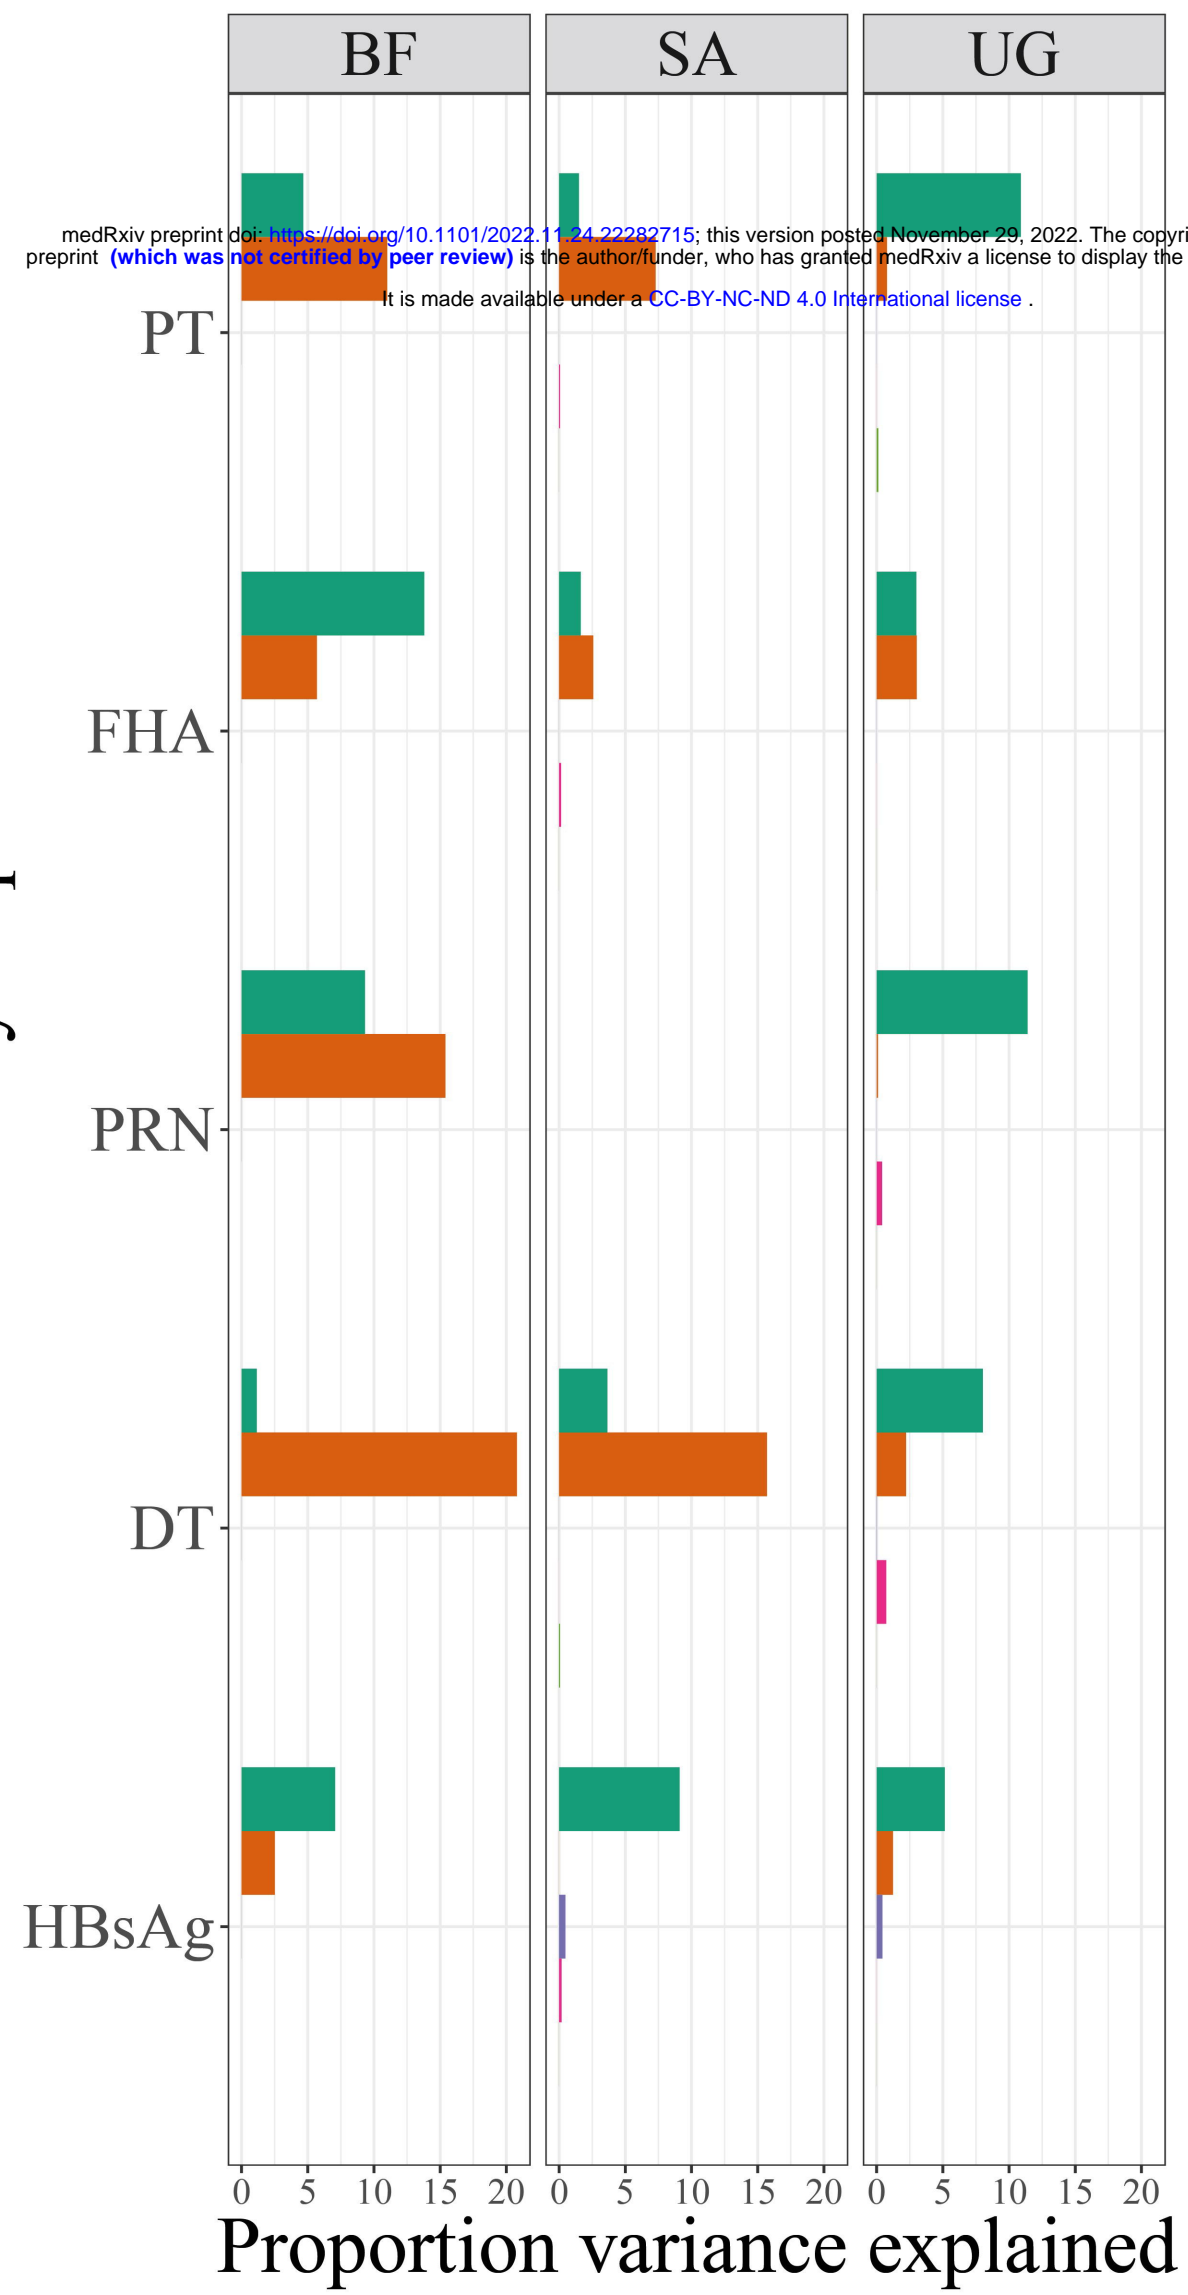

B

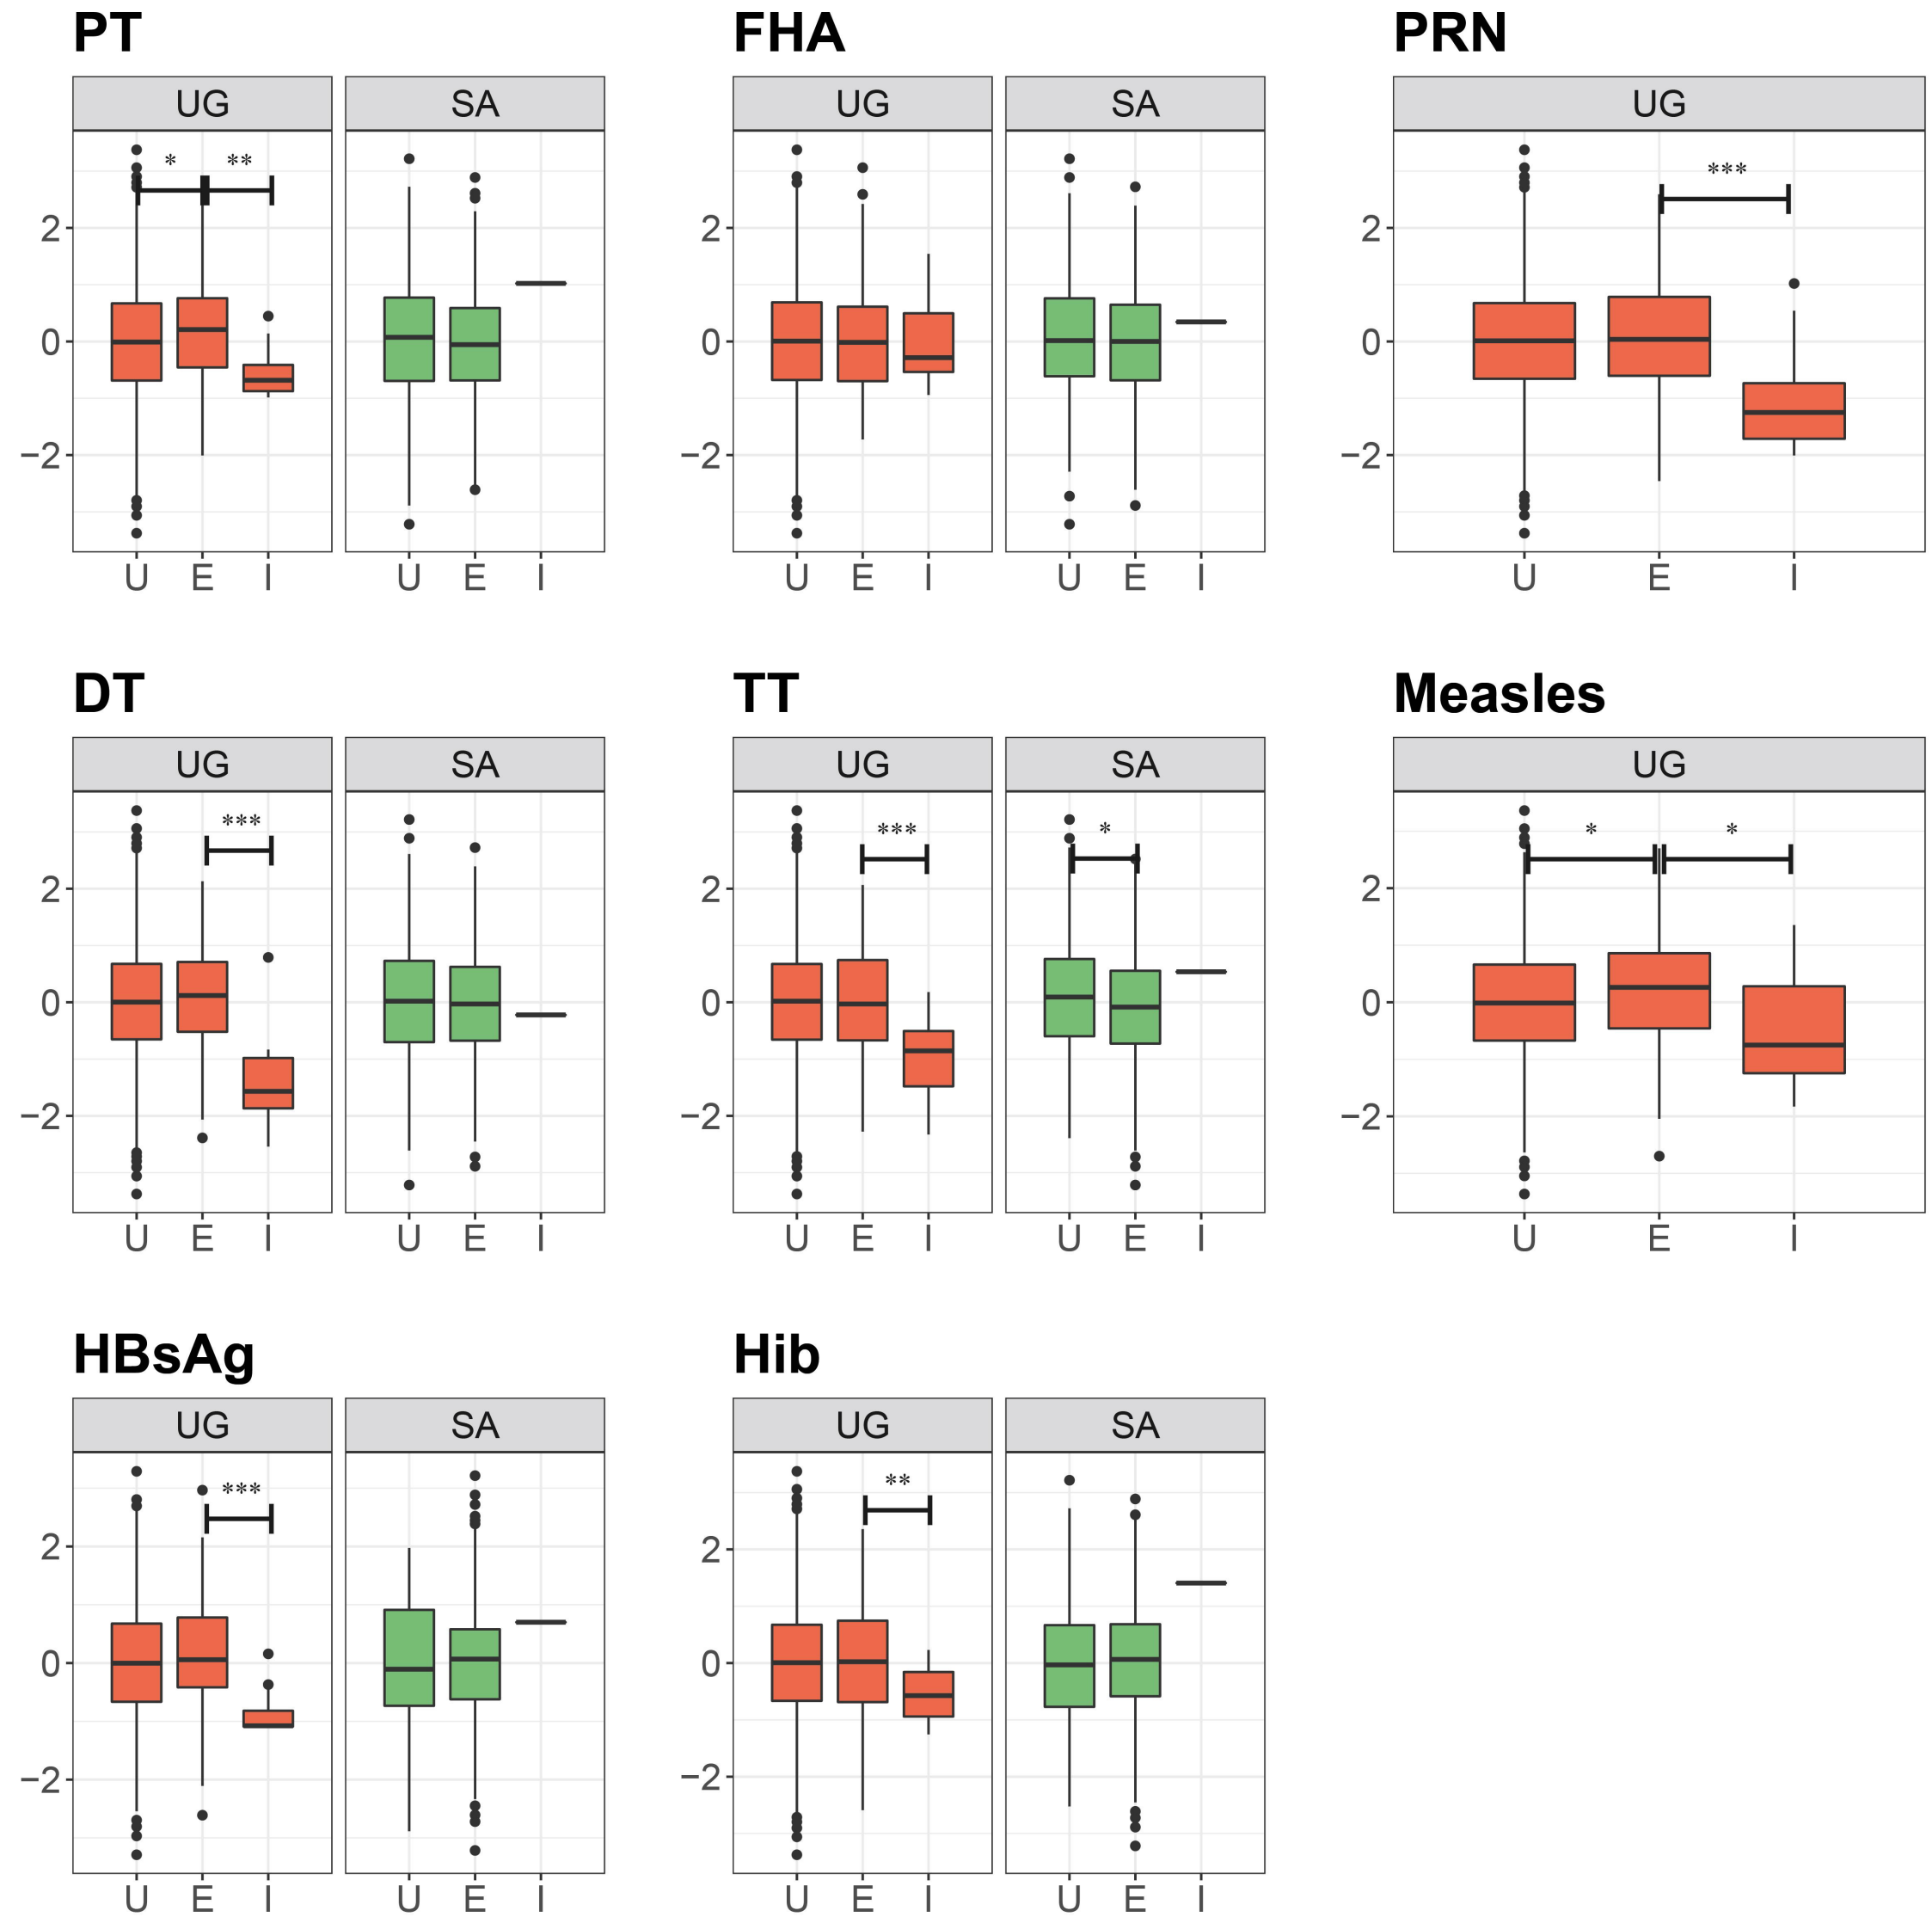

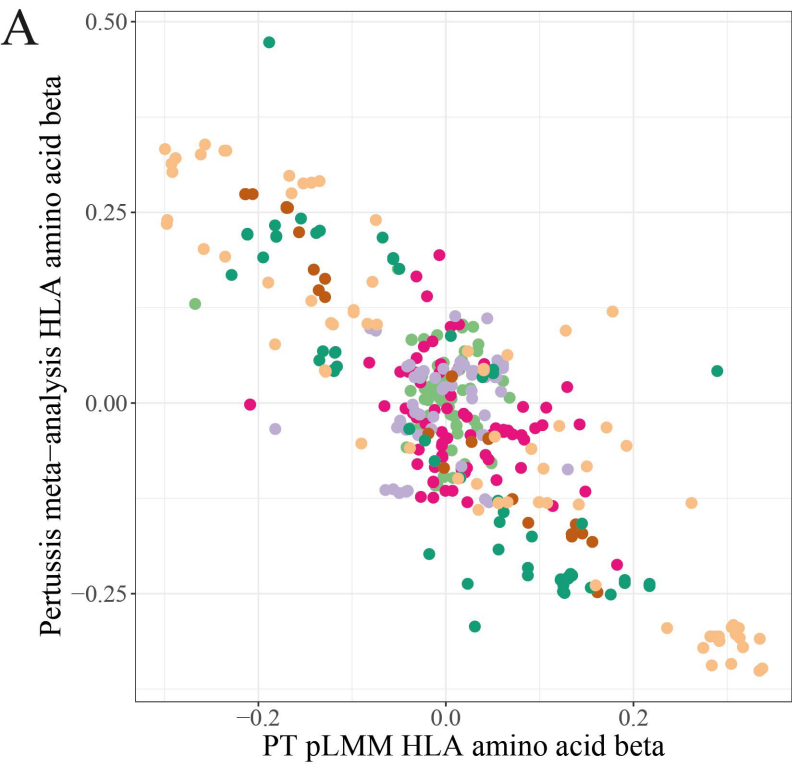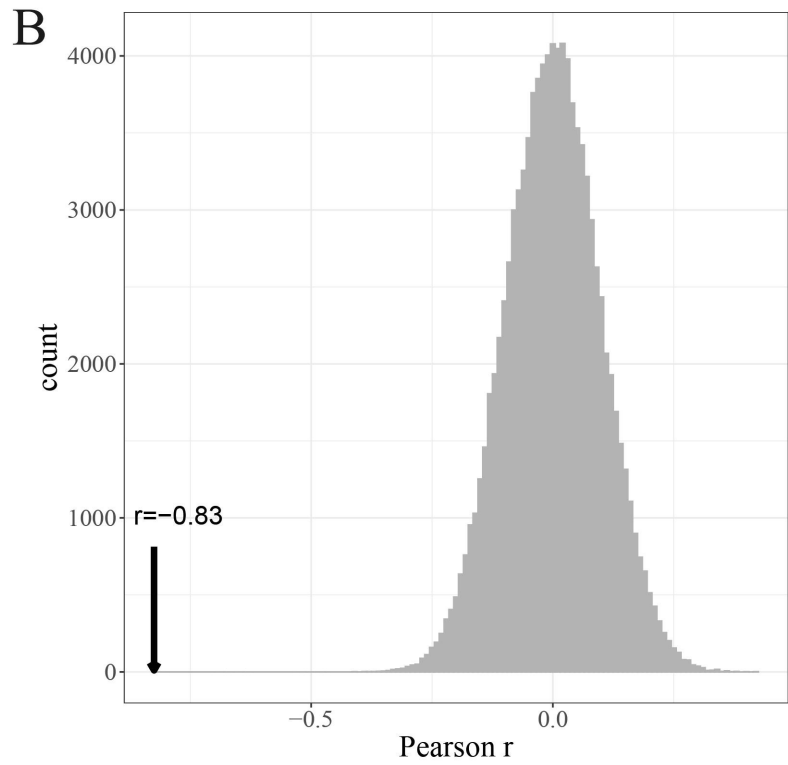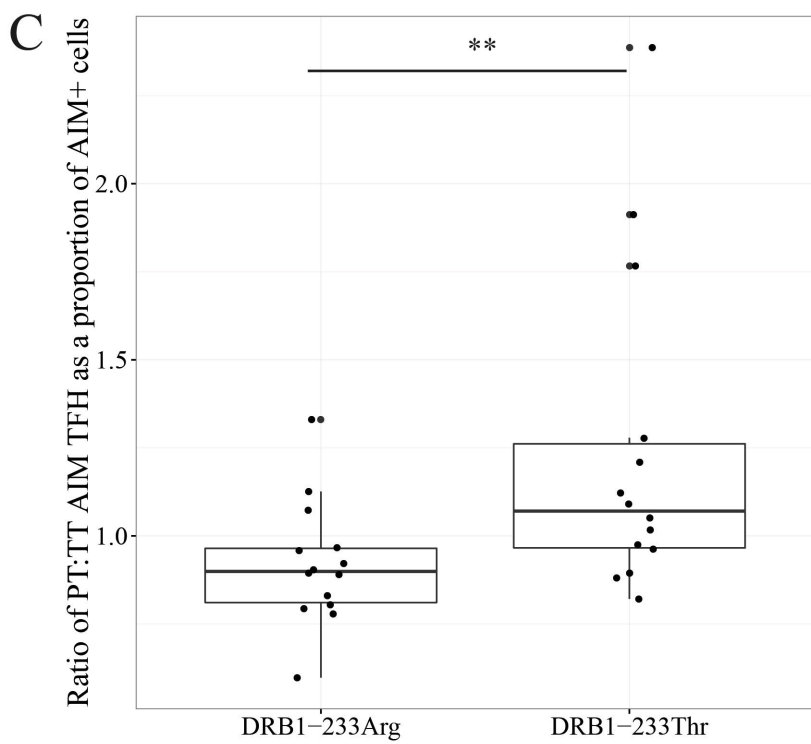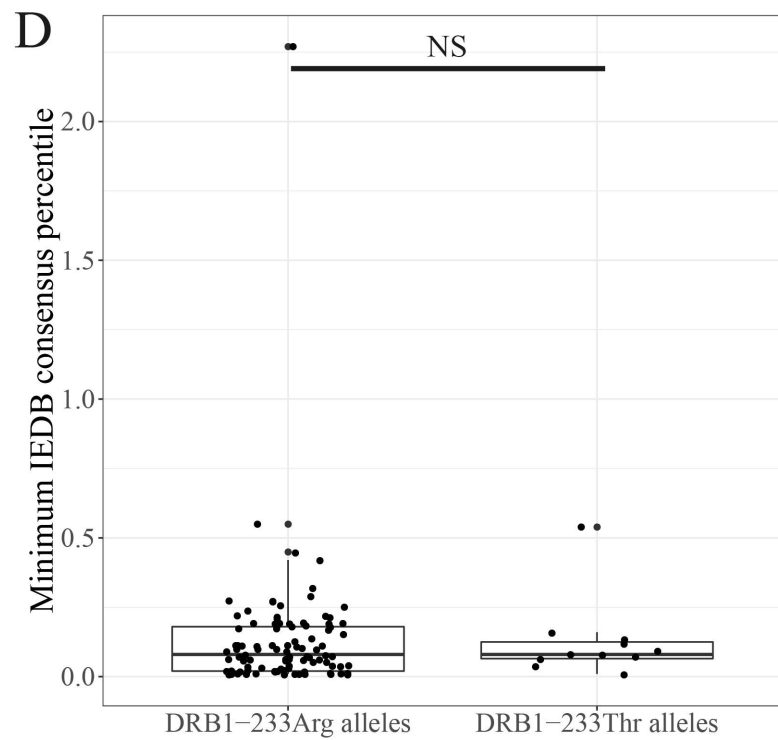

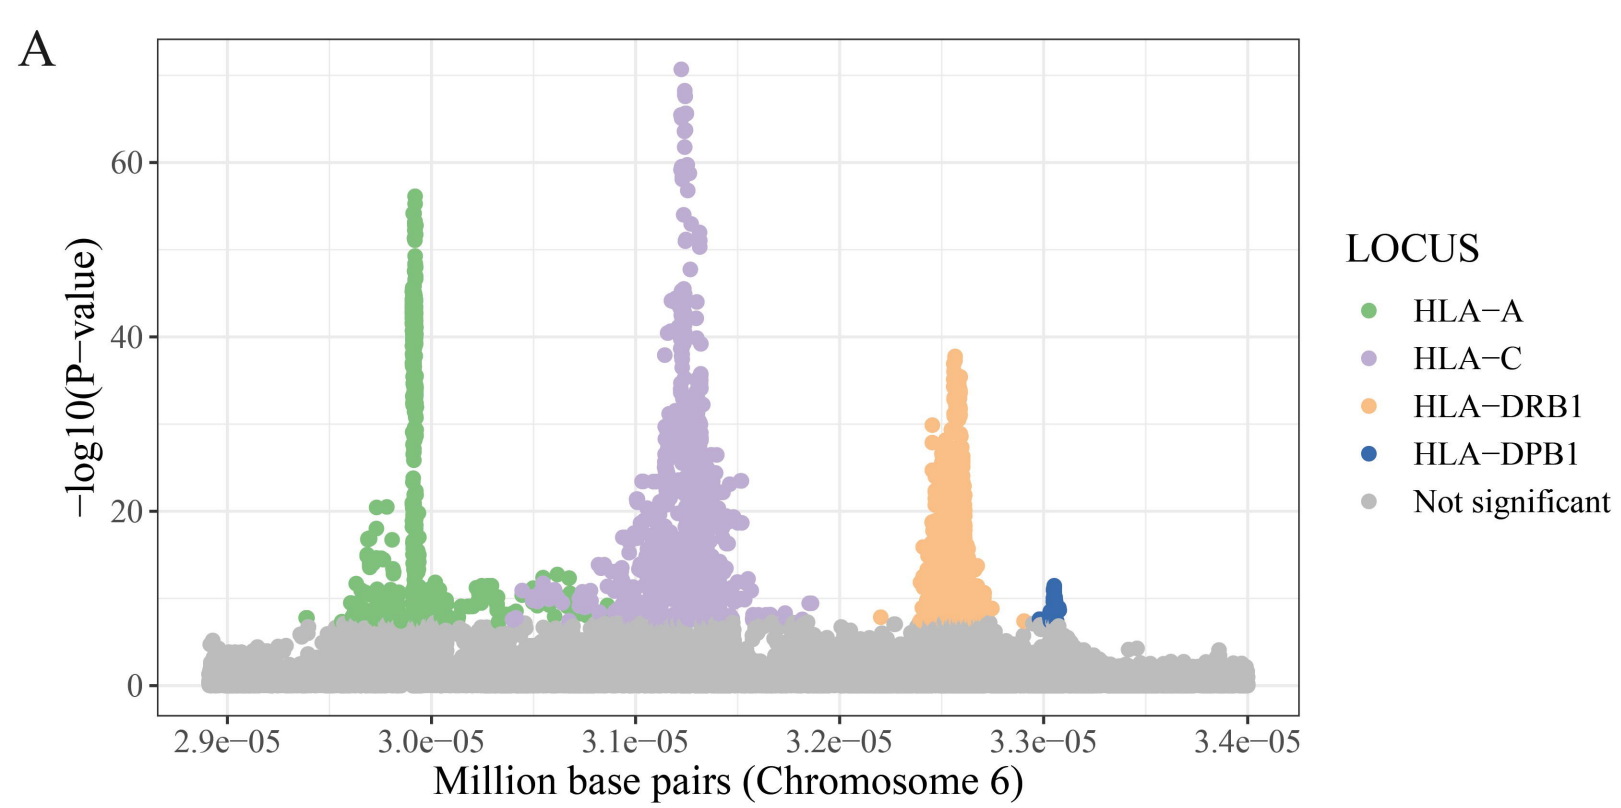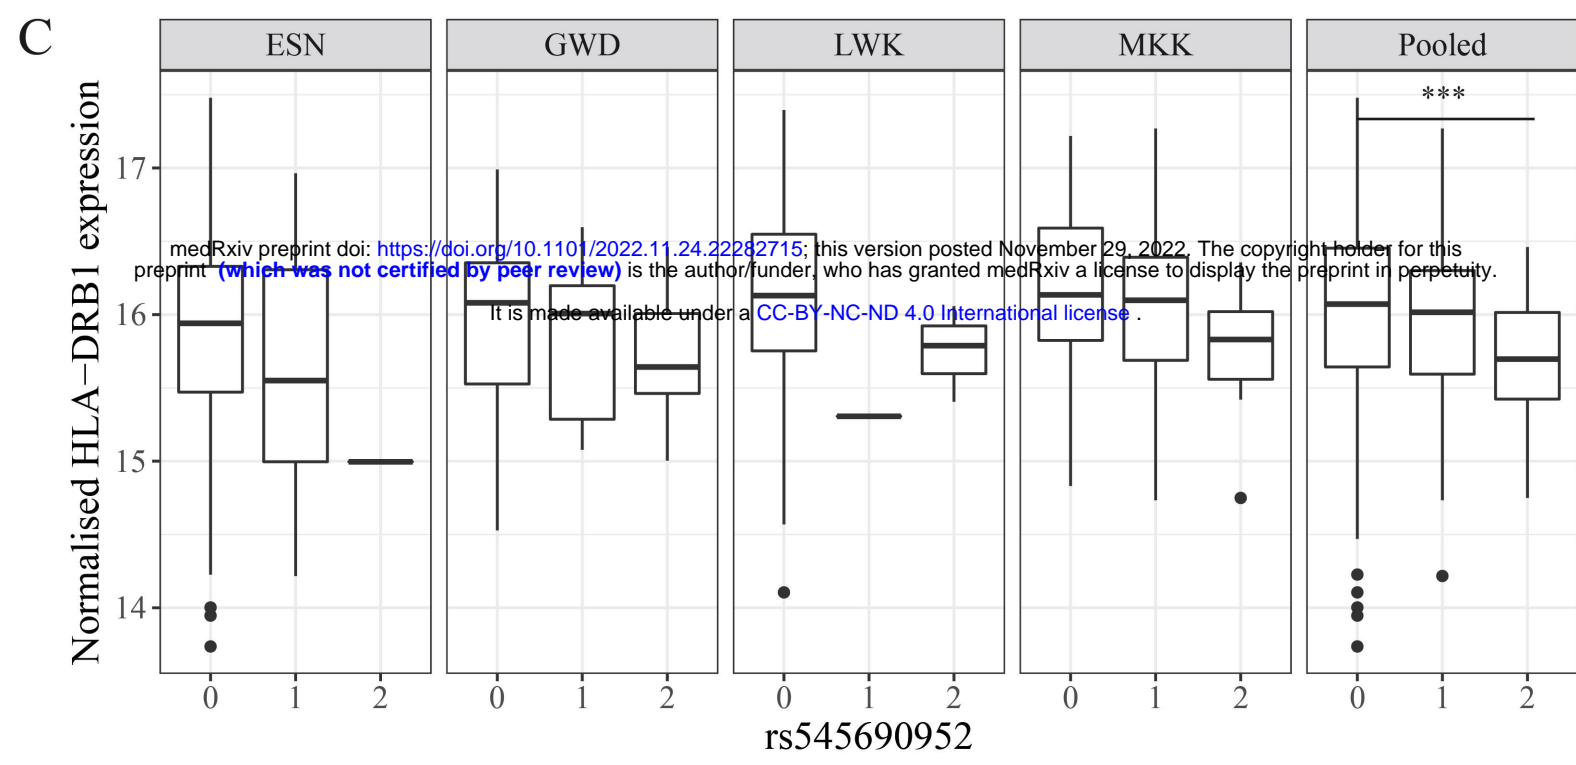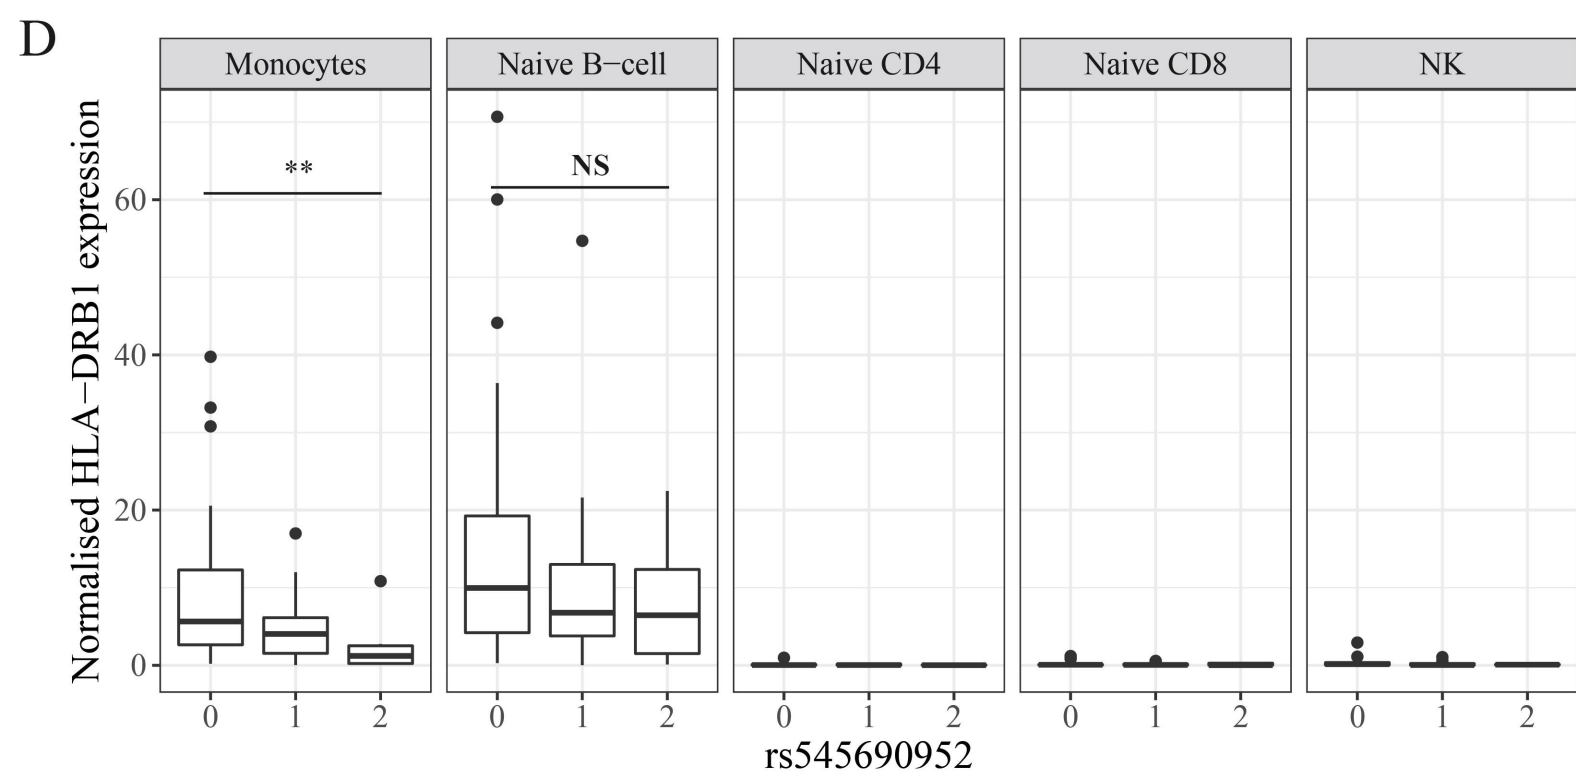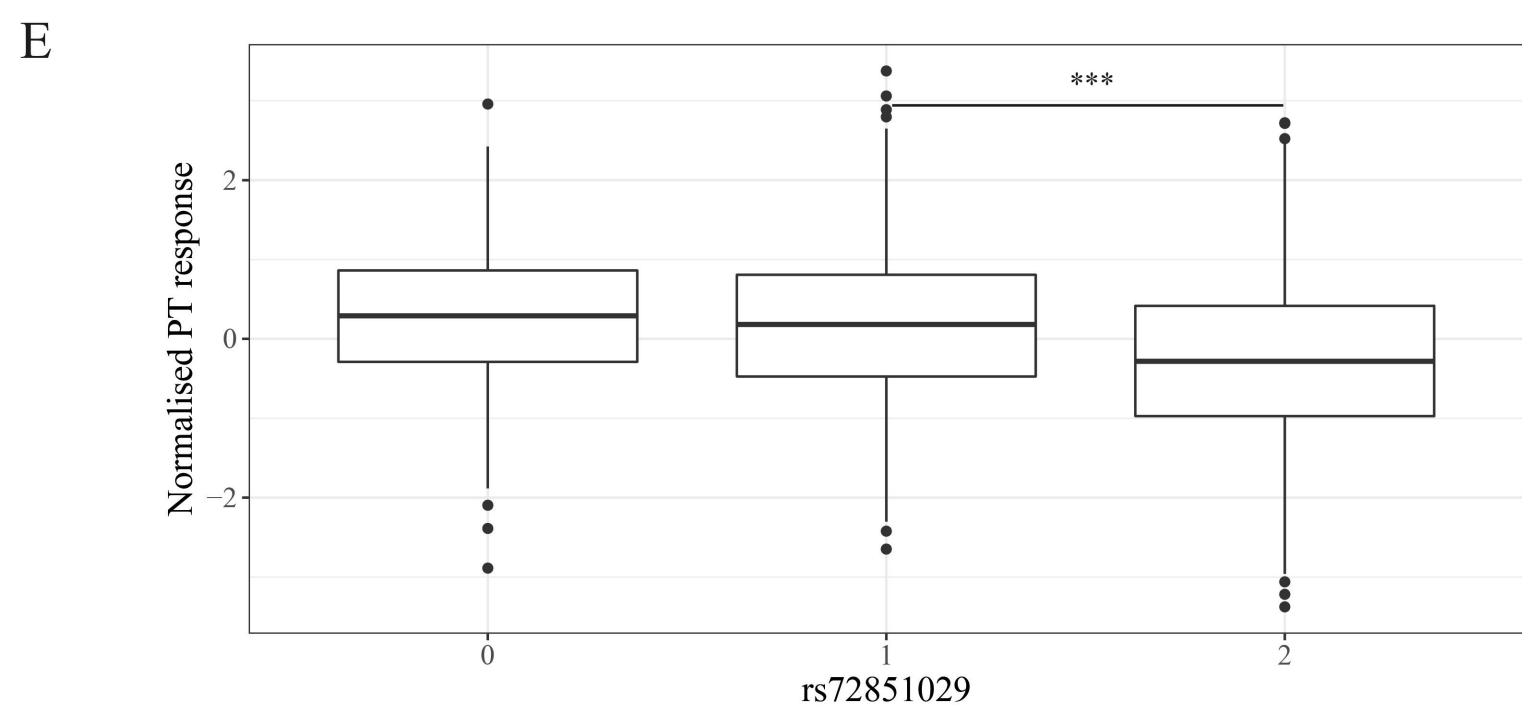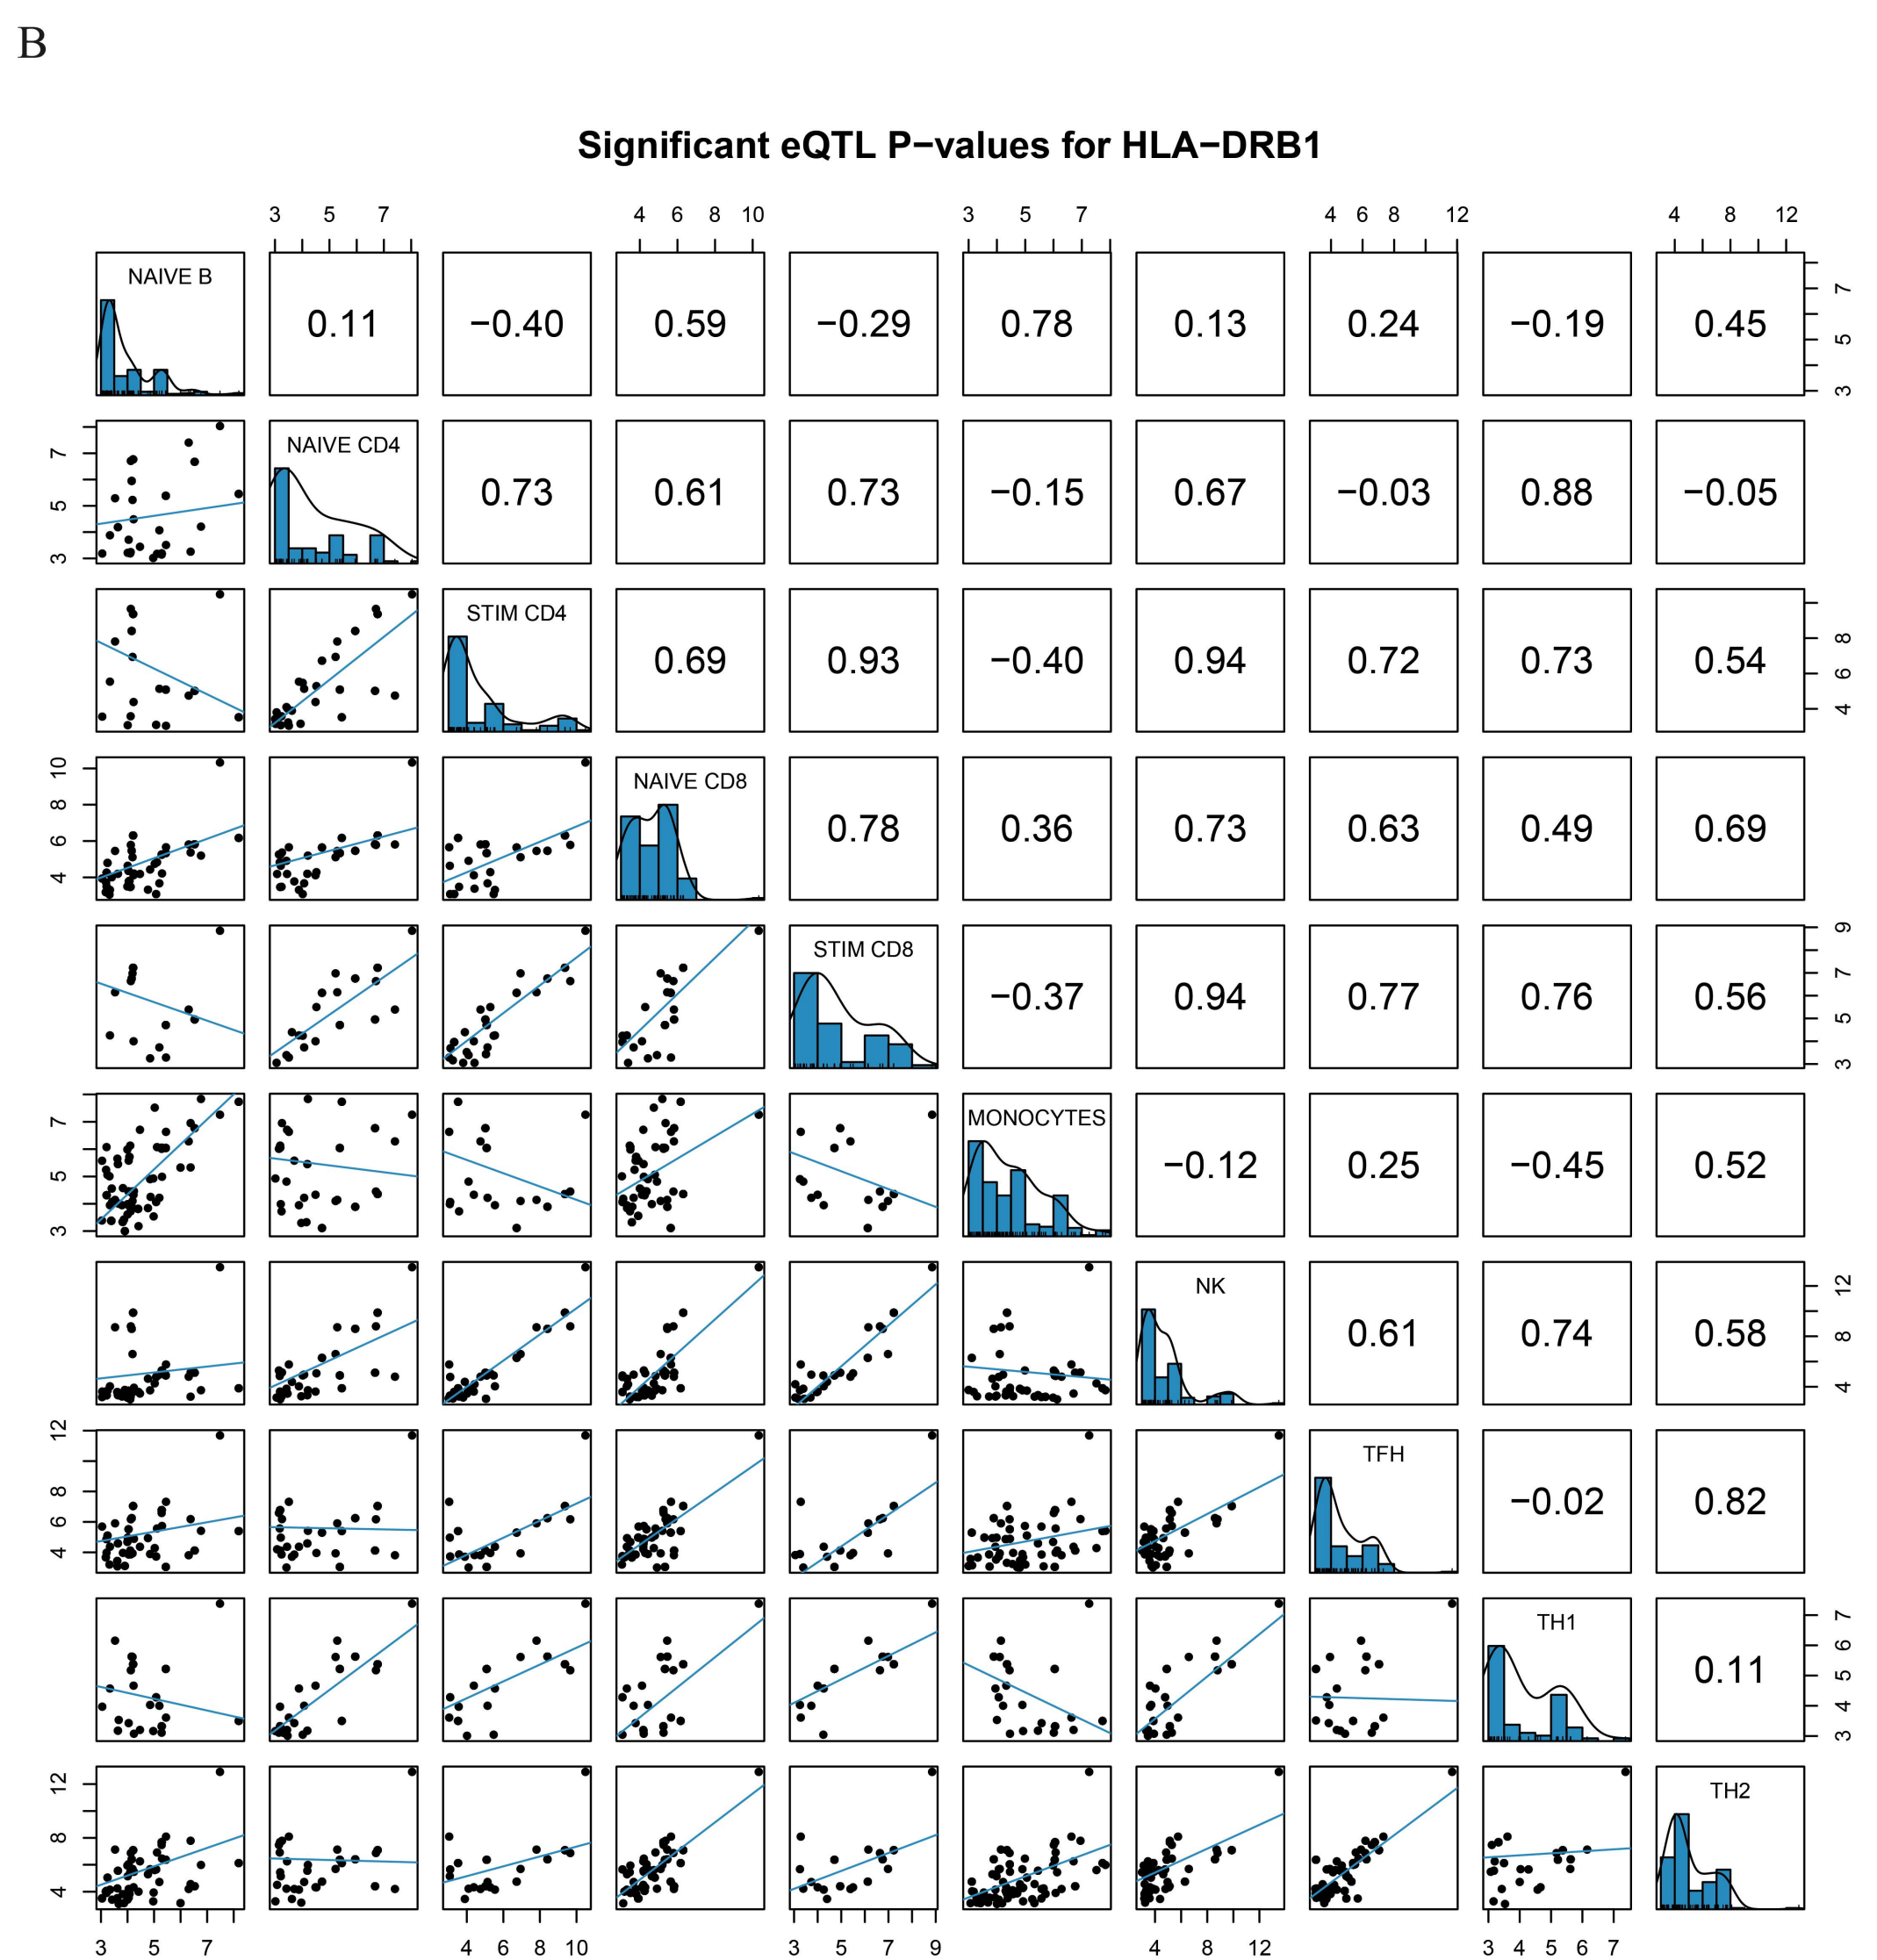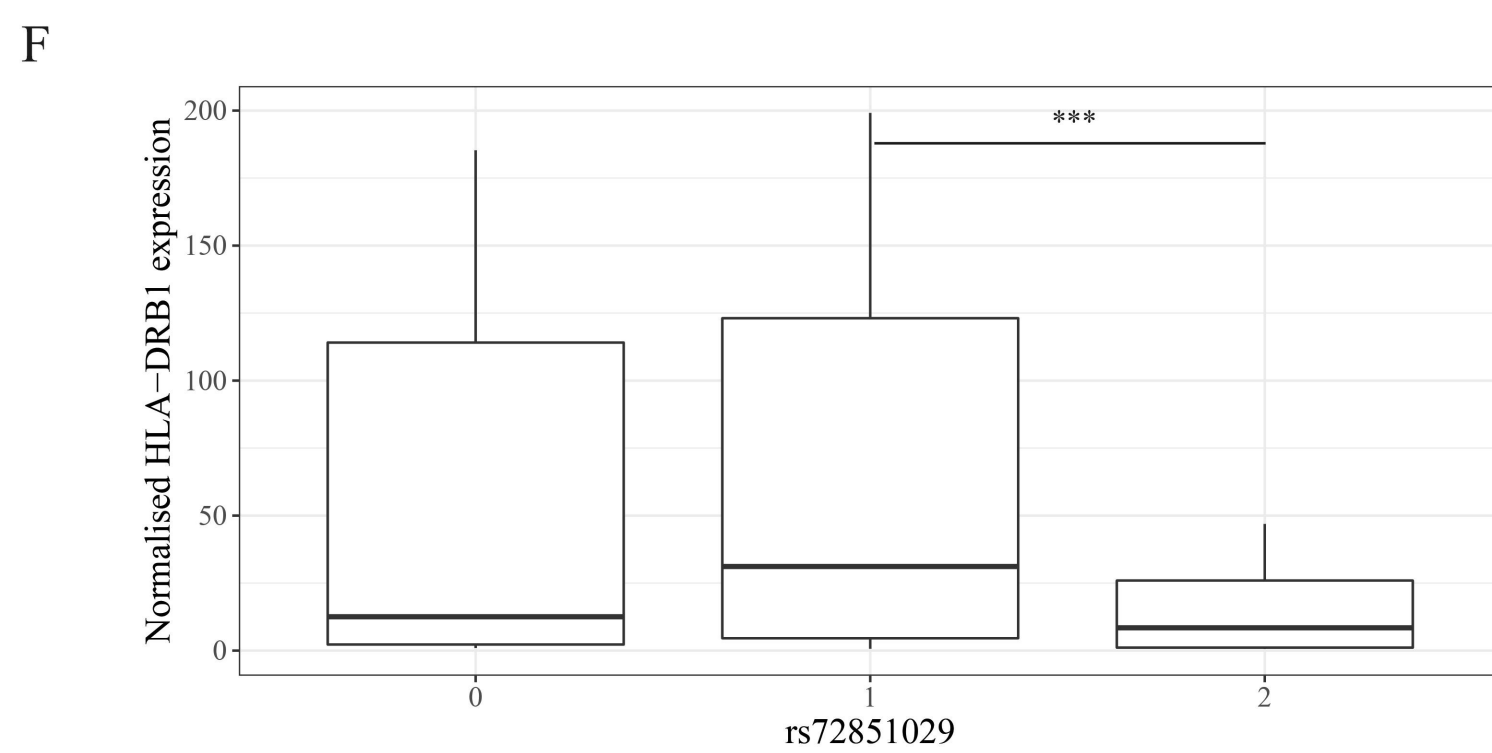

Source: https://medrxiv.org/content/10.1101/2022.11.24.22282715v1.full.pdf
